# Supplementary material for: ggComp enables dissection of germplasm resources and construction of a multiscale germplasm network in wheat
Source: PubMed Central journal article supplement — Plant Physiol. 2022 Jan 28;188(4):1950–65. doi: 10.1093/plphys/kiac029 (PMC8968352; doi:10.1093/plphys/kiac029), 2022-01-28
Supplement: kiac029_supplementary_data.pdf [file kiac029_supplementary_data.pdf]

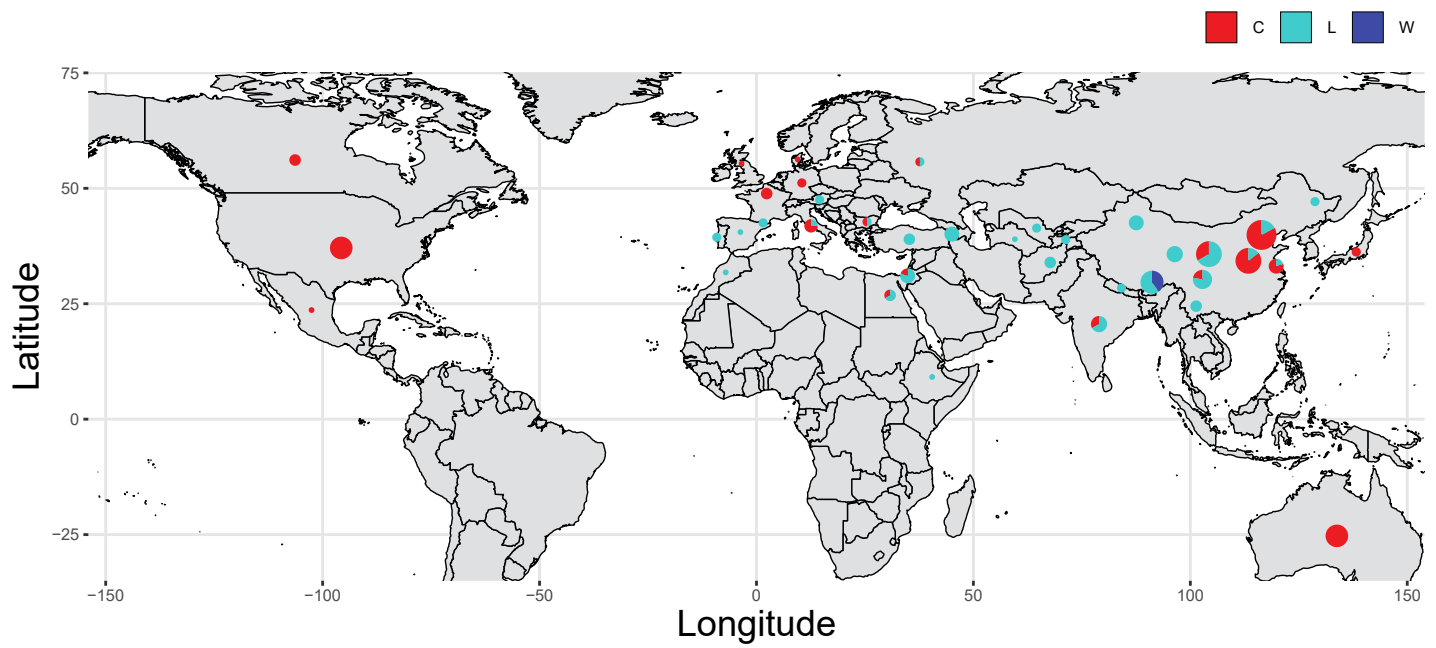

Supplemental Figure S1. Geographic distribution of wheat accessions by country or region of origin. Bubble sizes and pie proportions are proportional to the sample sizes. C, cultivar; L, landrace; W, semi-wild.

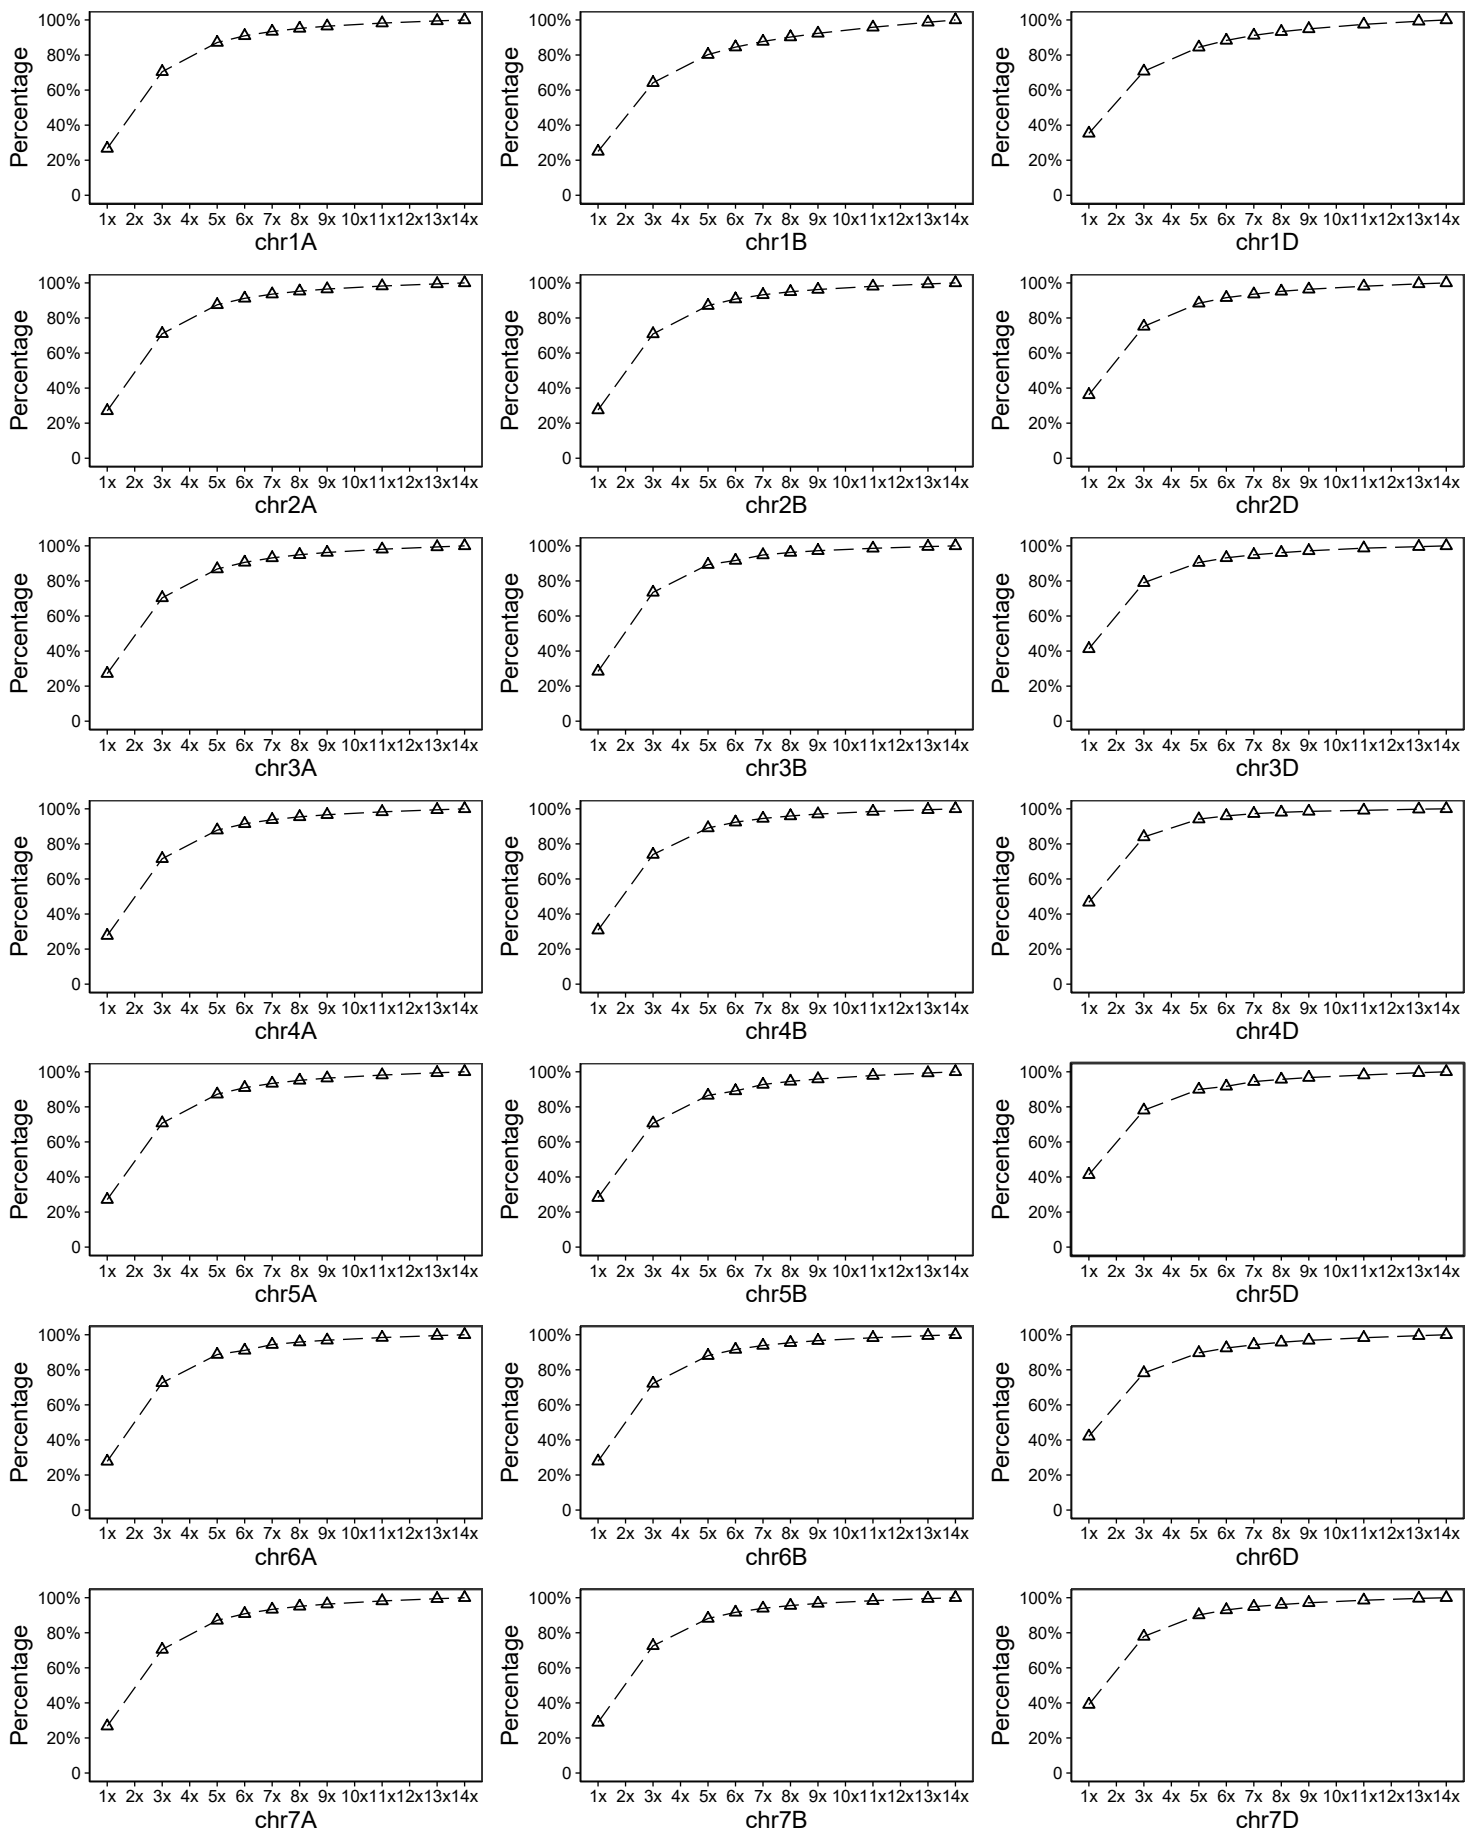

Supplemental Figure S2. The effect of mapping depth on SNP recall rate.

The proportions of detected homozygous SNP in different sequencing coverage were compared to the full data.

Abbreviatio: SNP: Single-nucleotide polymorphism

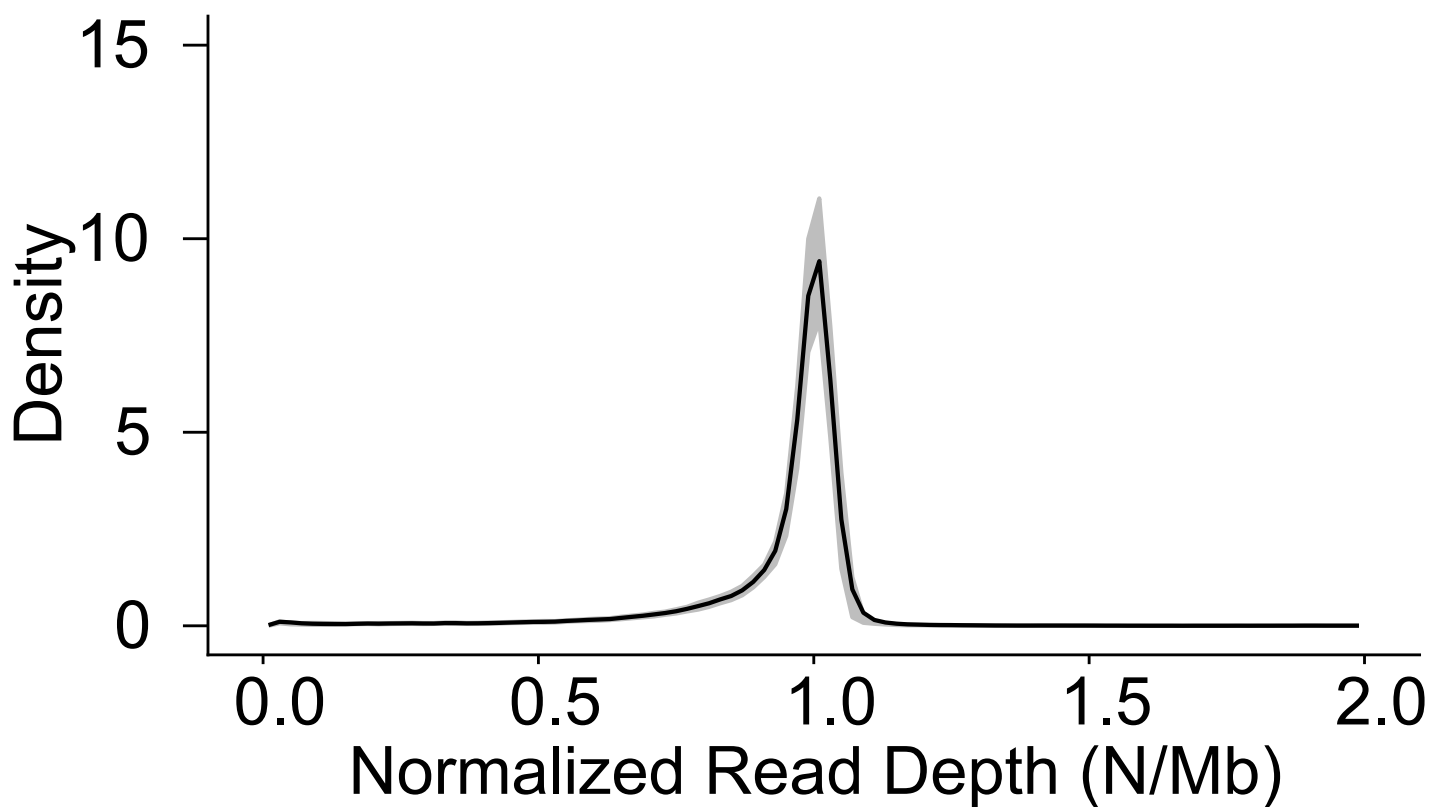

Supplemental Figure S3. Distribution of normalized read depth per bin along whole genome of all accessions. N refers to reads number of each bin after normalized. Black curve indicates the mean of each plot bins and gray shade illustrates the 45%-75% density of each normalized read depth.

**A**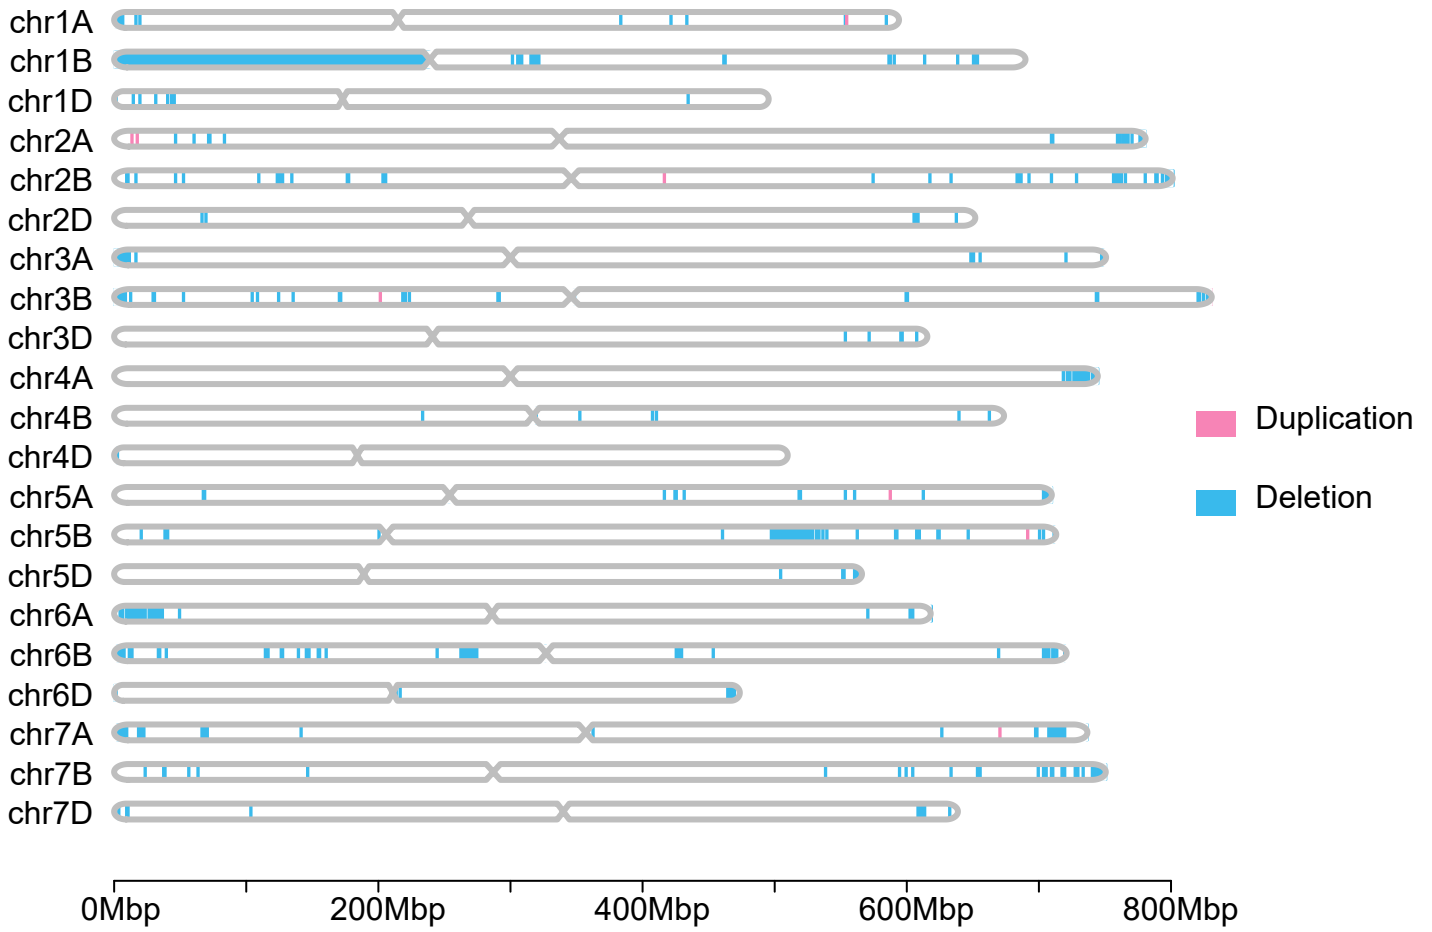**B**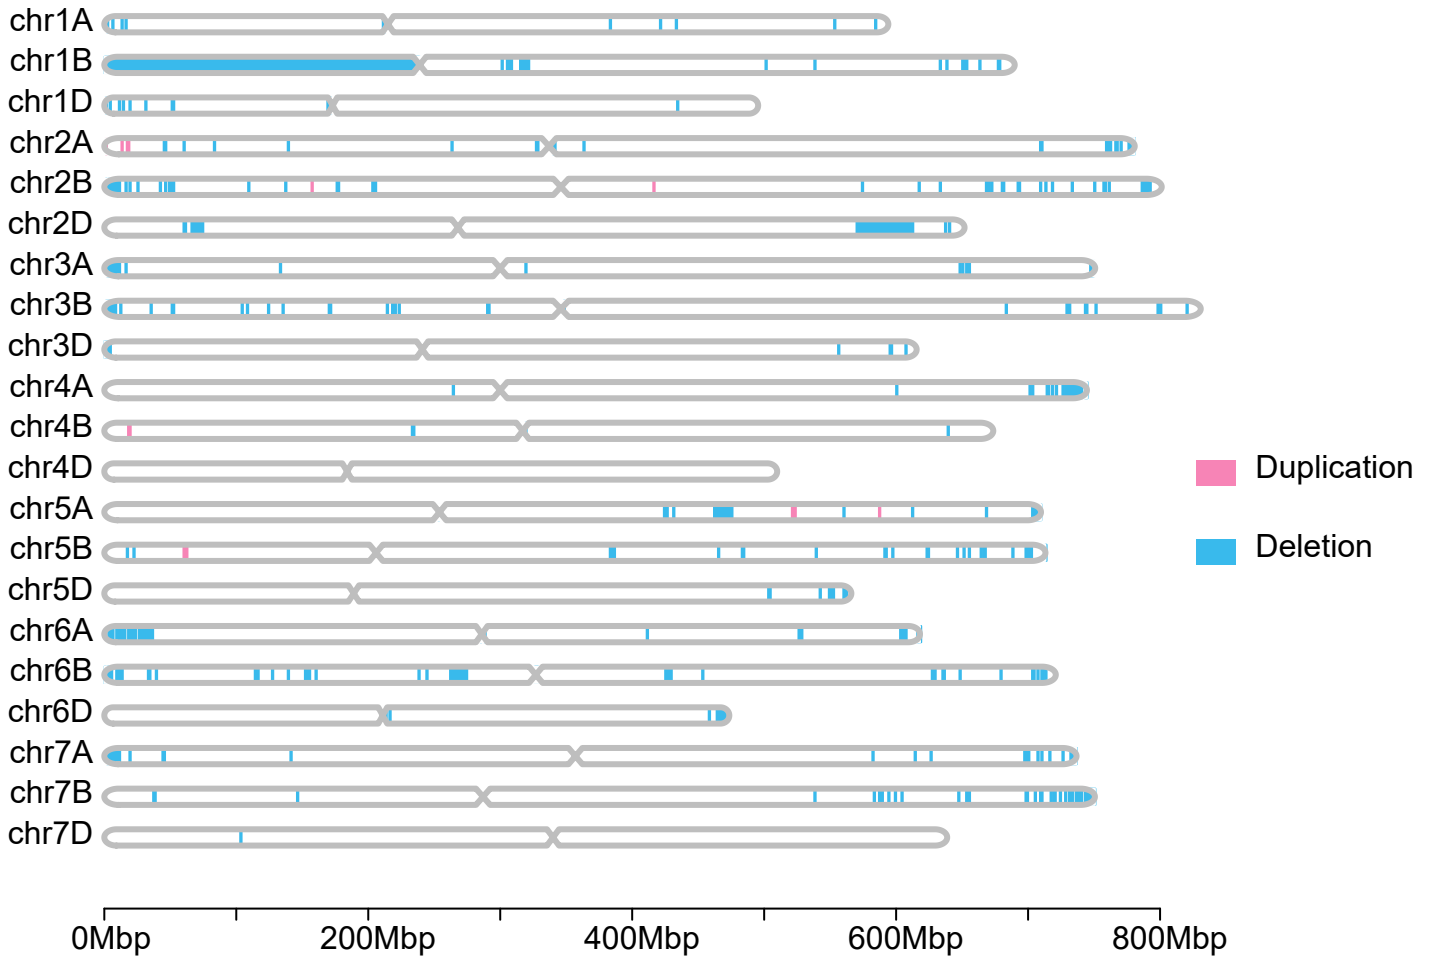

Supplemental Figure S4. CNV block distribution of Aikang58 and Lovrin10.

(A) Aikang58, (B) Lovrin10. Blue, CNV-deletion blocks; Pink, CNV-duplication blocks

Abbreviation: CNV: Copy number variation



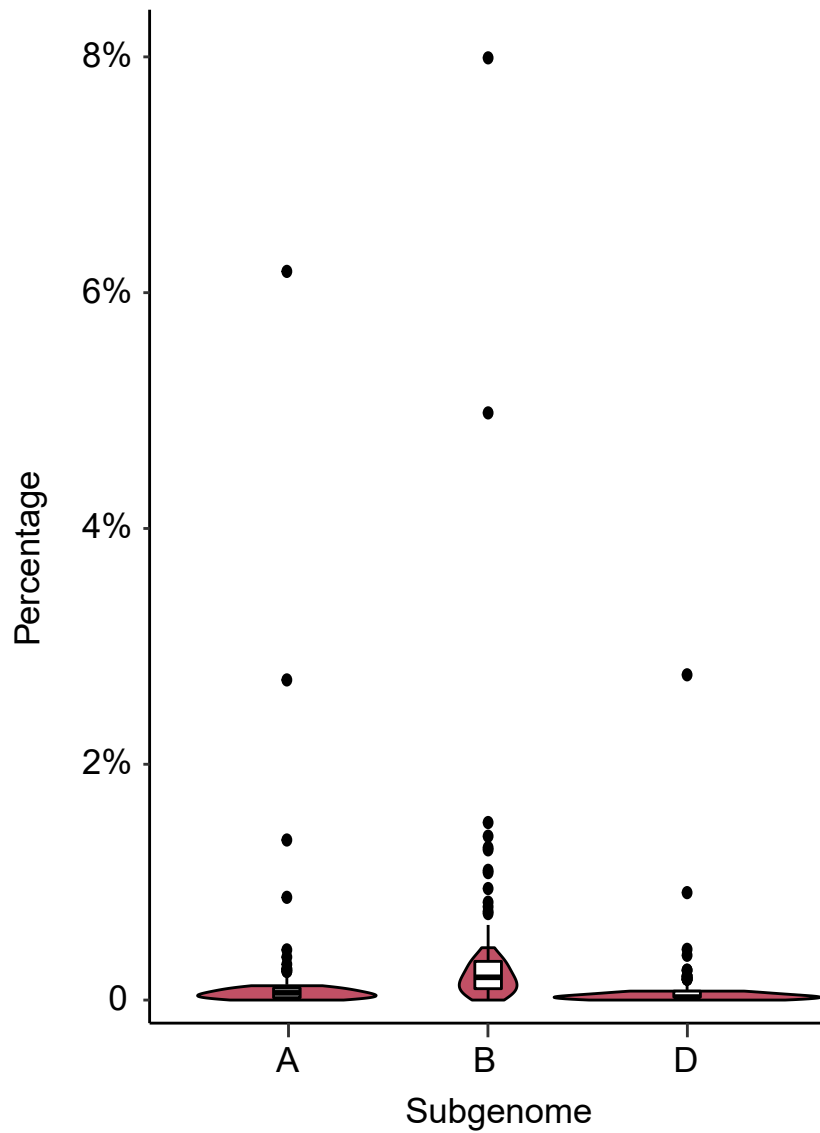

Supplemental Figure S5. Distribution of CNV-duplication blocks ratios in A, B, D subgenomes. Horizontal line indicates the median value.

Abbreviation: CNV, Copy number variation

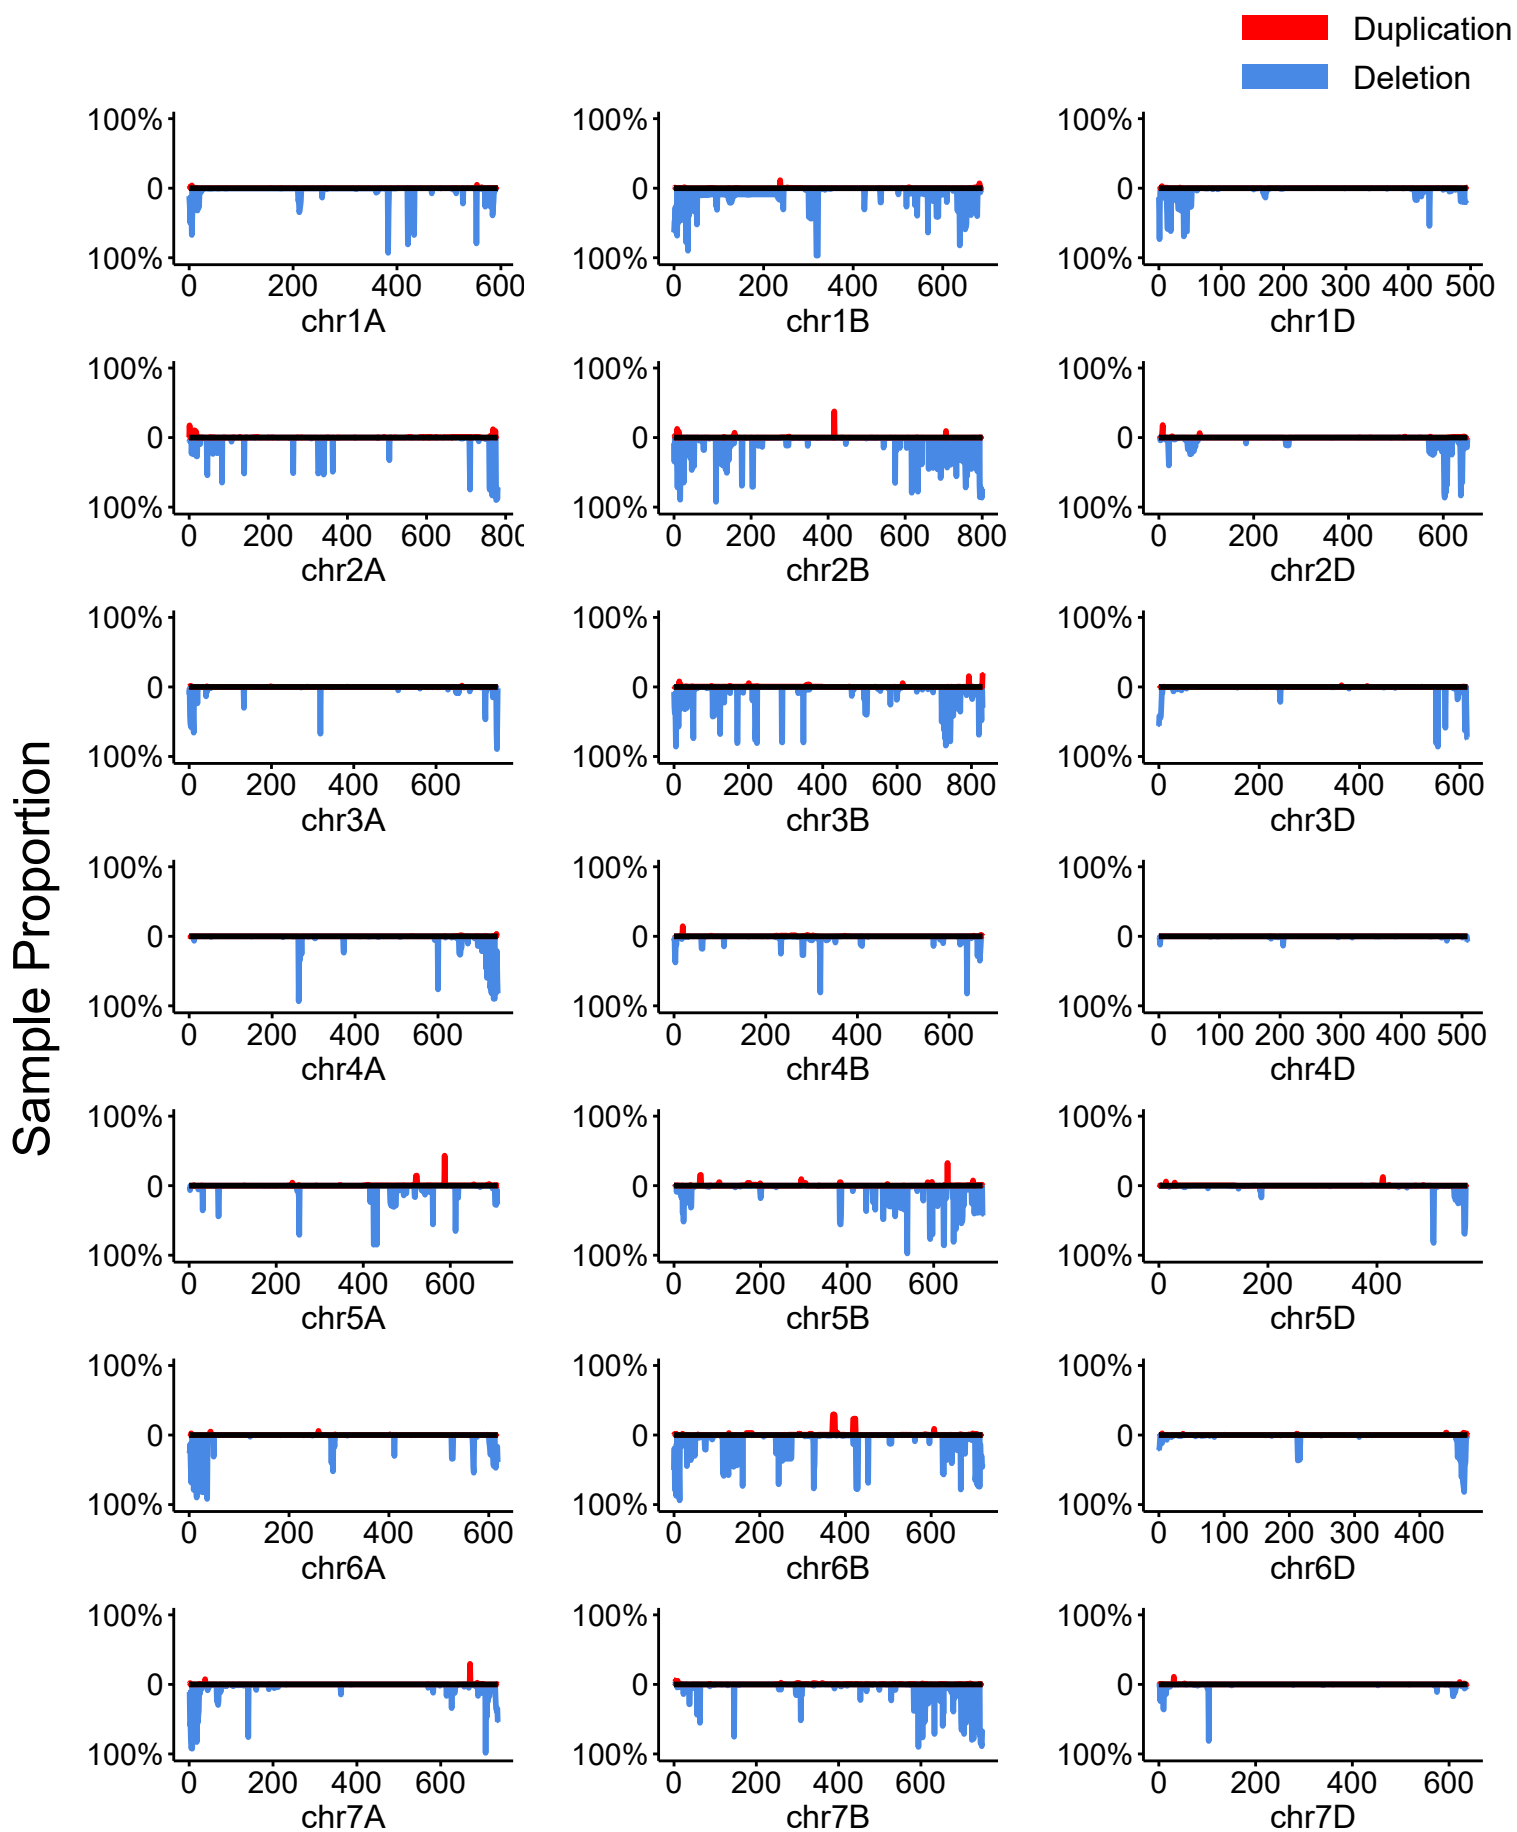

Supplemental Figure S6. Frequency of CNV-deletion blocks (blue) and CNV-duplication blocks (red) in each window of all accessions along whole genome compared with the Chinese Spring reference genome.

Abbreviation: CNV, Copy number variation

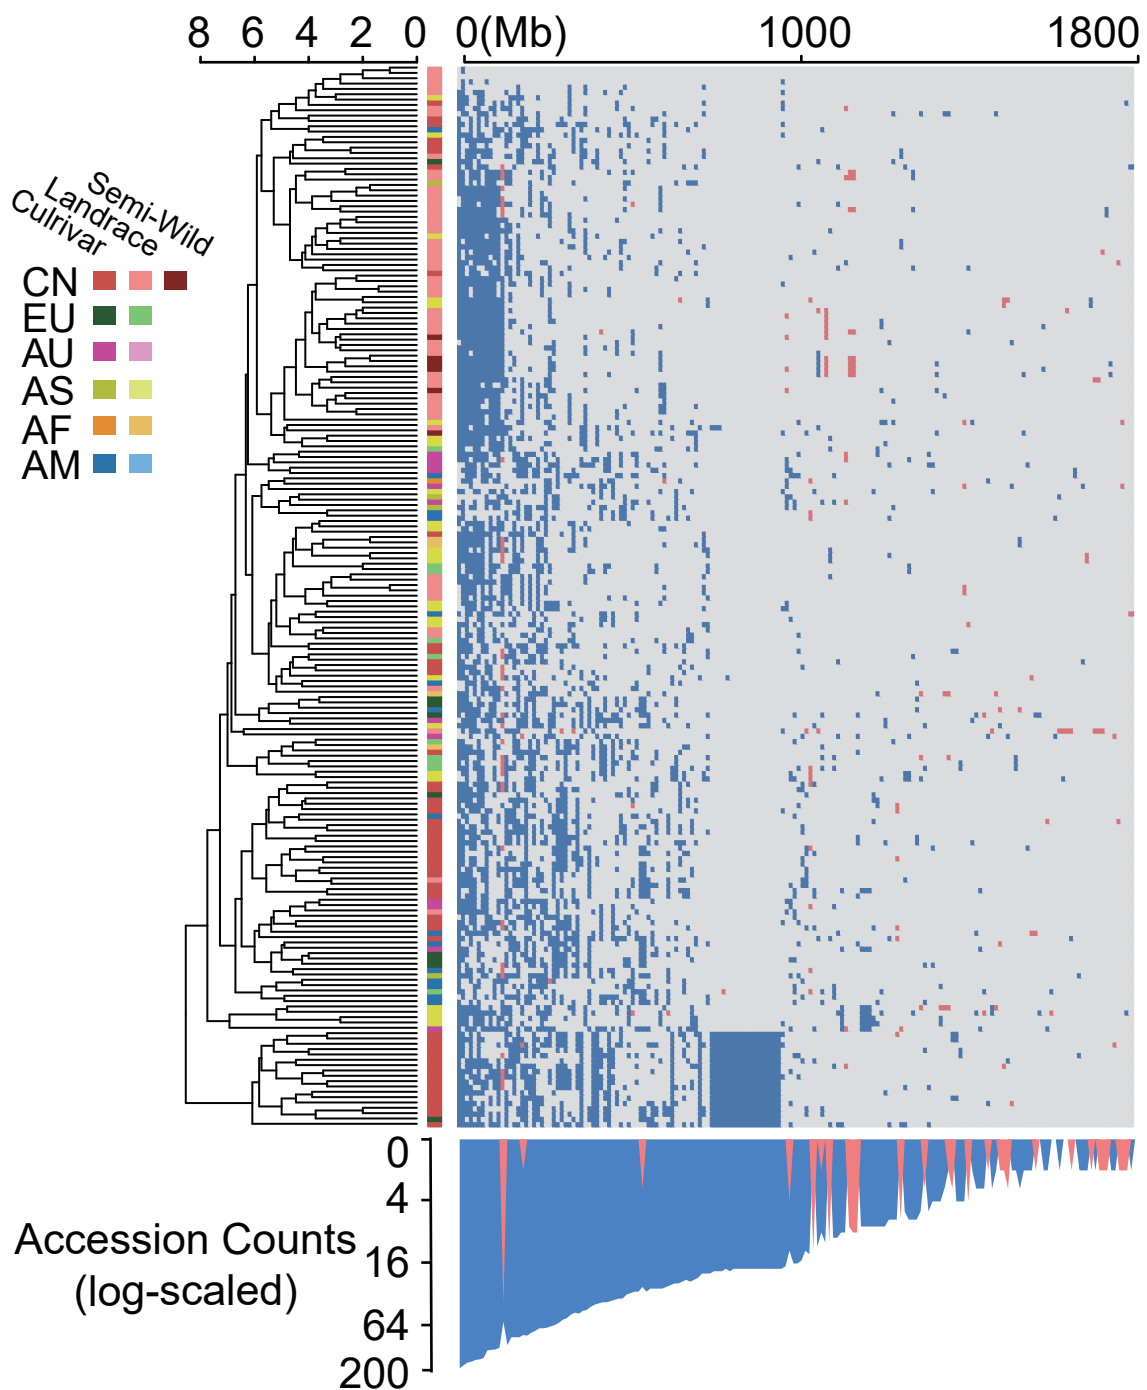

Supplemental Figure S7 Profile of CNV segments distribution in wheat accessions.

Left panel: Hierarchical cluster tree based on CNV blocks information of all accessions (left). CNV-deletion blocks, CNV-duplication blocks and un-CNV blocks are encoded as 0,2,1 into matrix to calculate distance between accessions. Mid bar indicates geographic origin of accession in each row (CN, Chinese accessions; EU, European accessions; AU, Australian accessions; AF: African accessions; AM, American accessions) and historical groups (cultivar, landrace, semi-wild). Upright panel: distribution pattern of CNV blocks shared with at least two accessions along whole genome. The order of CNV blocks was sorted according to their frequencies. Red box, CNV-duplication block; Blue box, CNV-deletion blocks. Bottom: Distribution of sample count in each bin along CNV distribution pattern. Red pattern, CNV-duplication block; Blue pattern, CNV-deletion blocks.

Abbreviation: CNV, Copy number variation

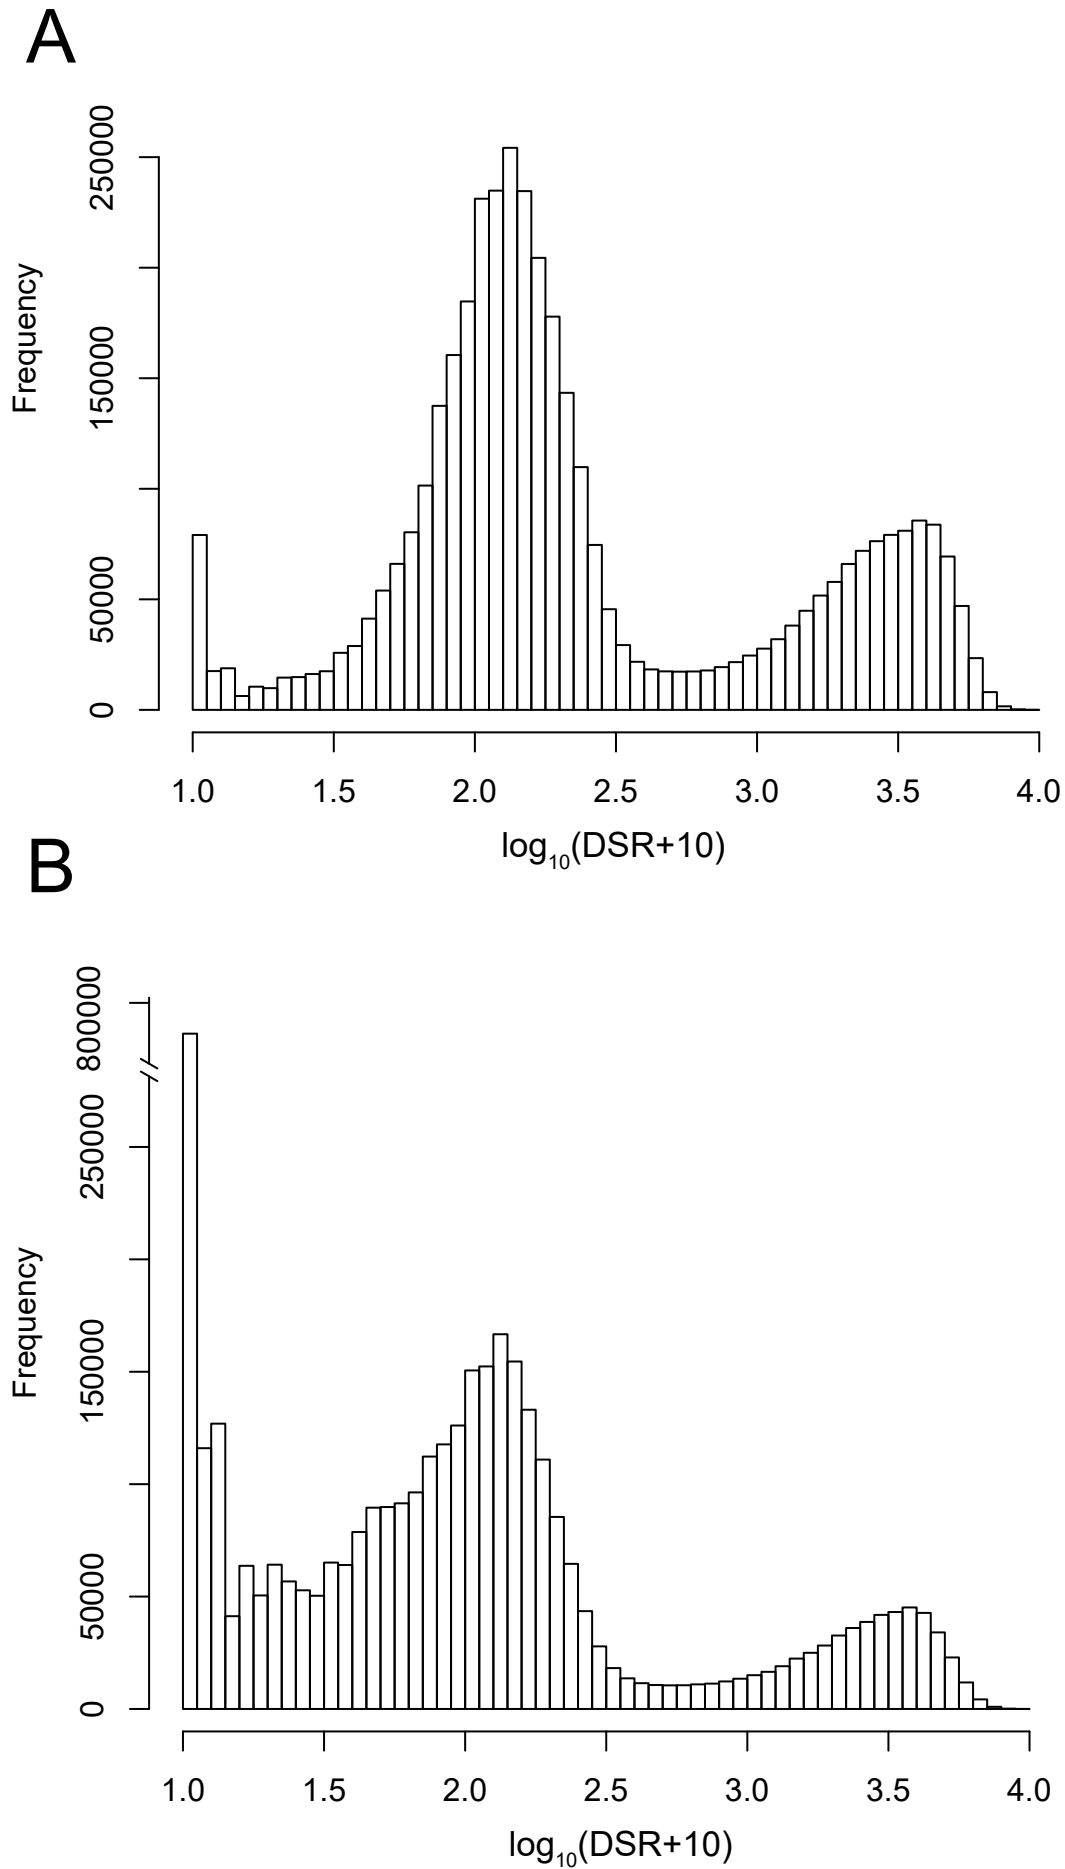

Supplemental Figure S8. Distribution of  $\log_{10}(\text{DSR}+10)$  in each window (1-Mbp length). (A), 300 accession pairs random selected from all accessions pairs; (B), accession pairs of 212 accessions with their top 2 nearest IBS genetic distances accessions.

Abbreviations: DSR, different SNP ratio; IBS, identical by state; SNP: Single-nucleotide polymorphism

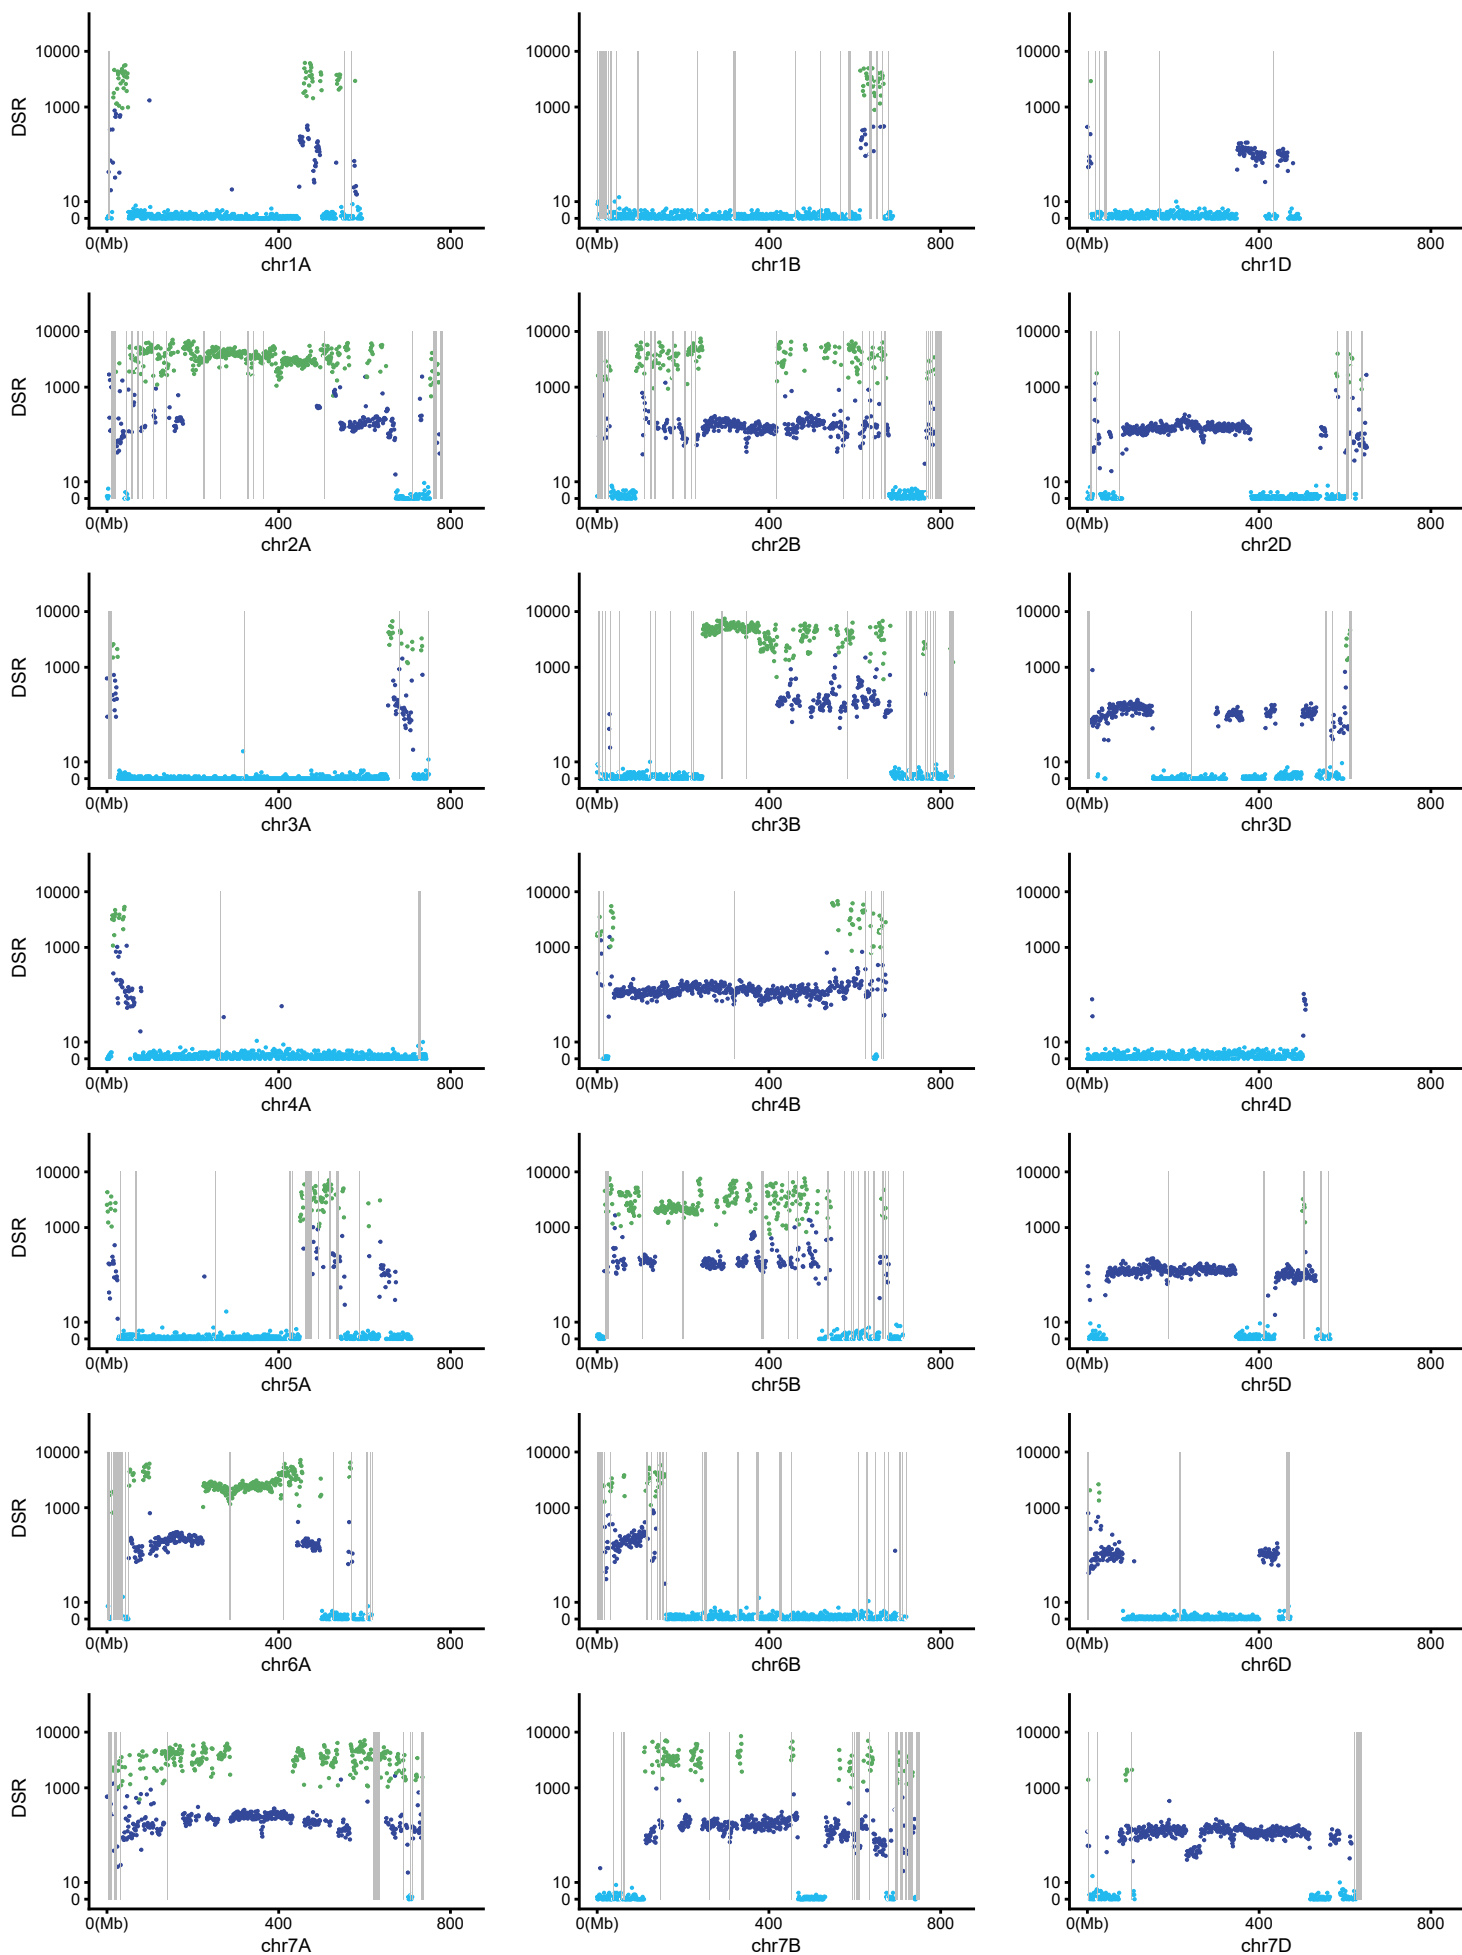

Supplemental Figure S9 Distribution of bin-wise SNP density between Bima4 and Bima1 along whole genome. Point colors correspond with the fitted low-, mid-, high- density of  $\log_{10}(\text{DSR}+10)$  distributions. Grey shadows indicate CNV blocks. Y-axis is log-scaled.

Abbreviations: DSR, different SNP ratio; SNP: Single-nucleotide polymorphism; CNV: Copy number variation

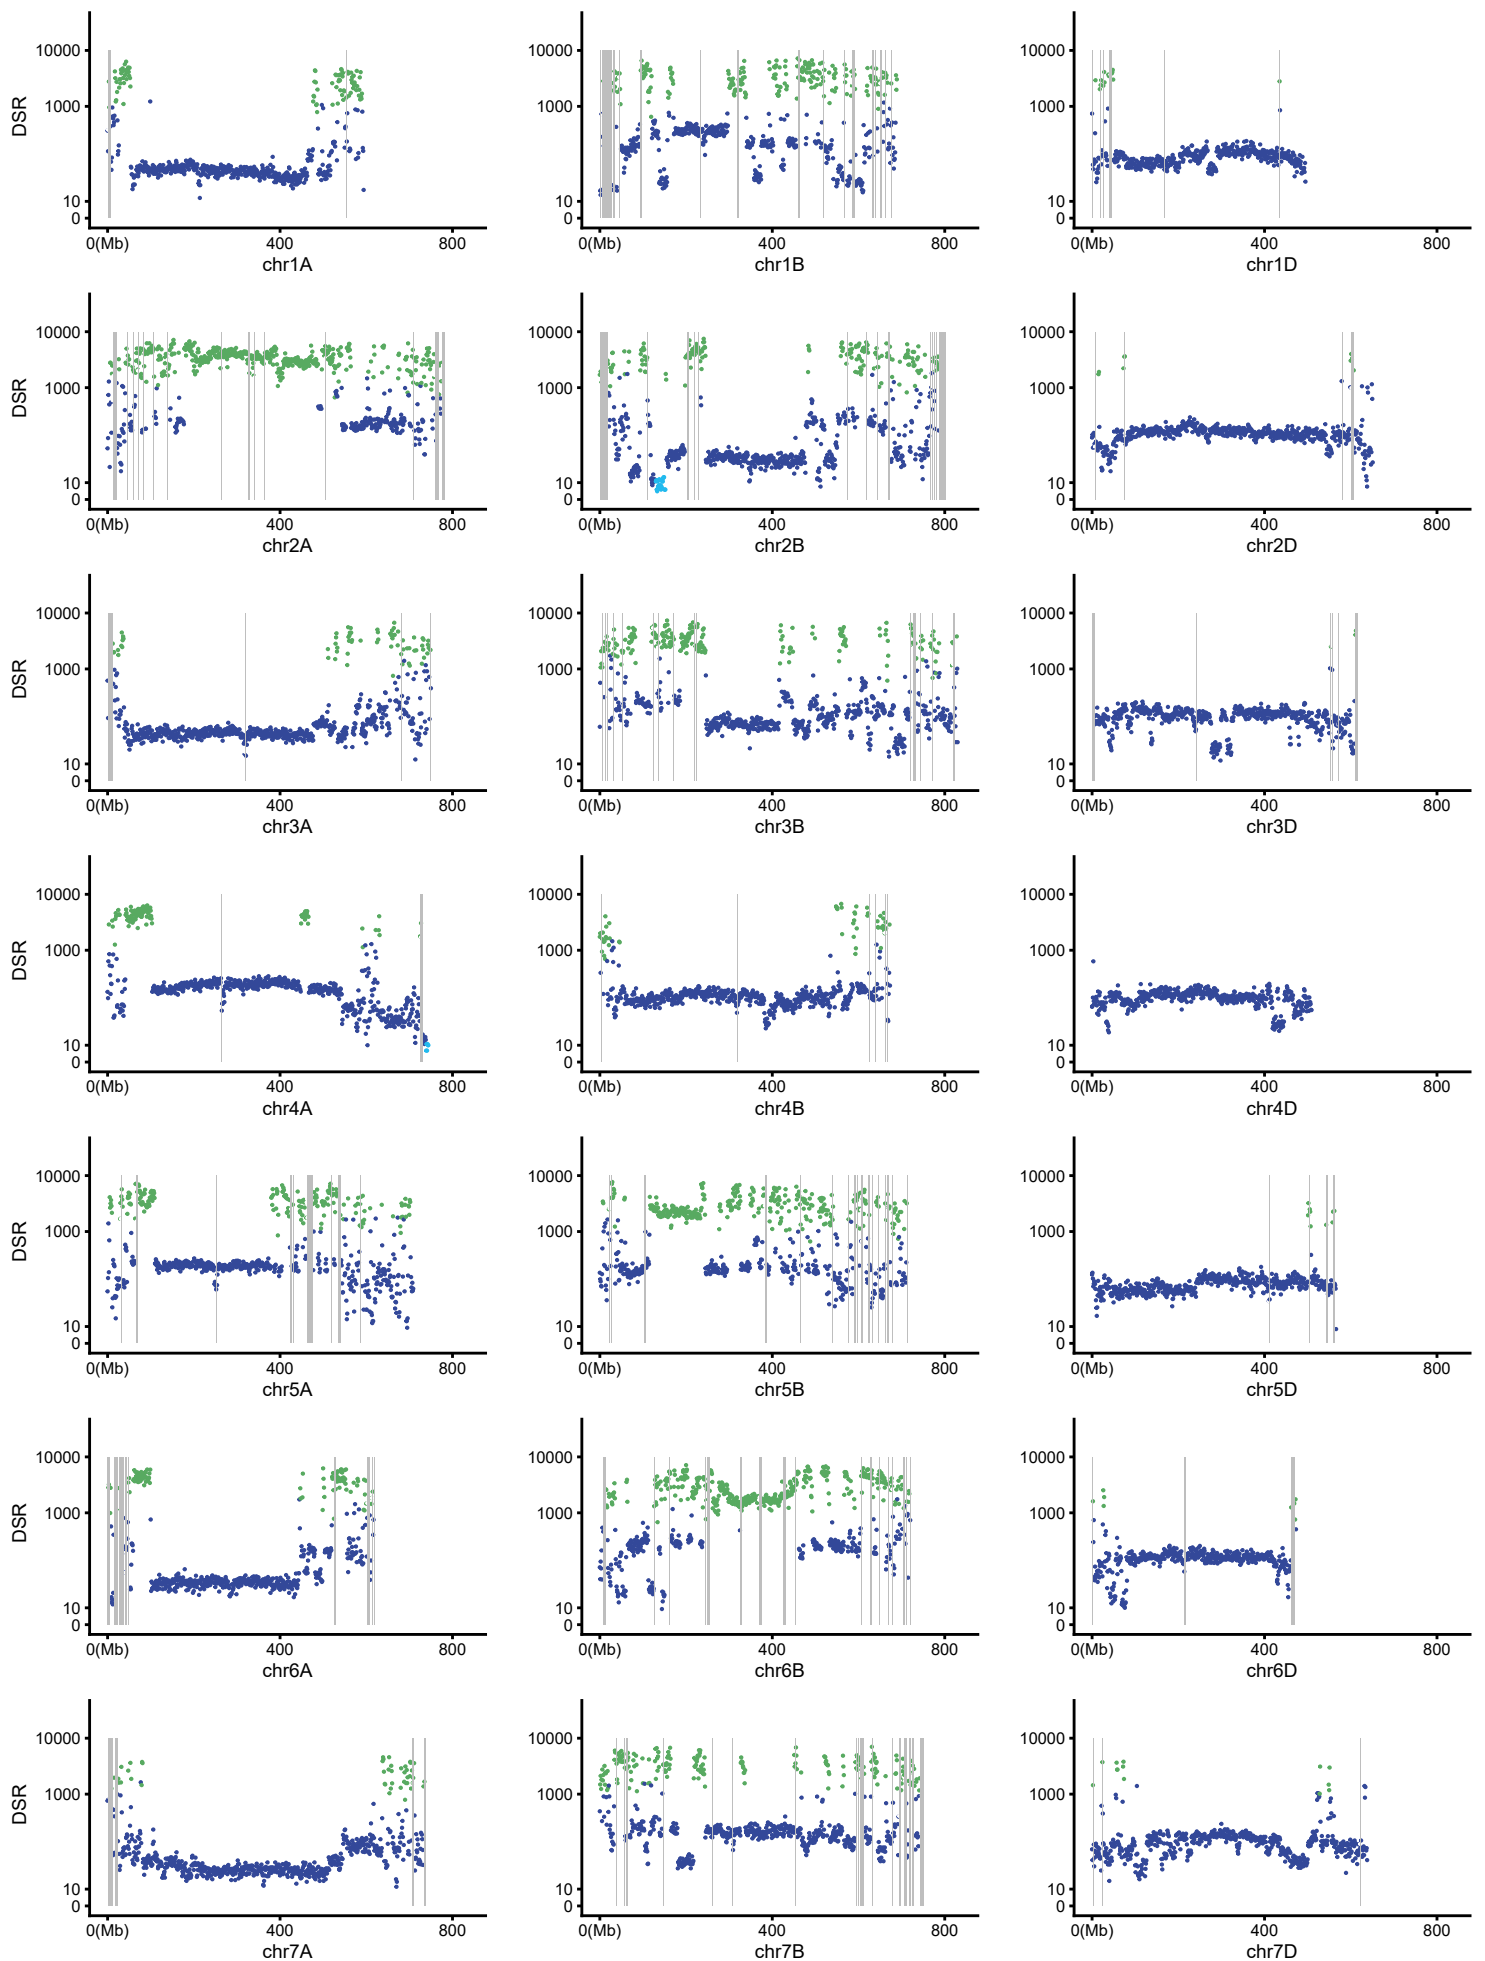

Supplemental Figure S10. Distribution of bin-wise SNP density between Bima4 and Chinese Spring along whole genome. Point colors correspond with the fitted low-, mid-, high- density of  $\log_{10}(\text{DSR}+10)$  distributions. Grey shadows indicate CNV blocks. Y-axis is log-scaled.

Abbreviations: DSR, different SNP ratio; SNP: Single-nucleotide polymorphism; CNV: Copy number variation

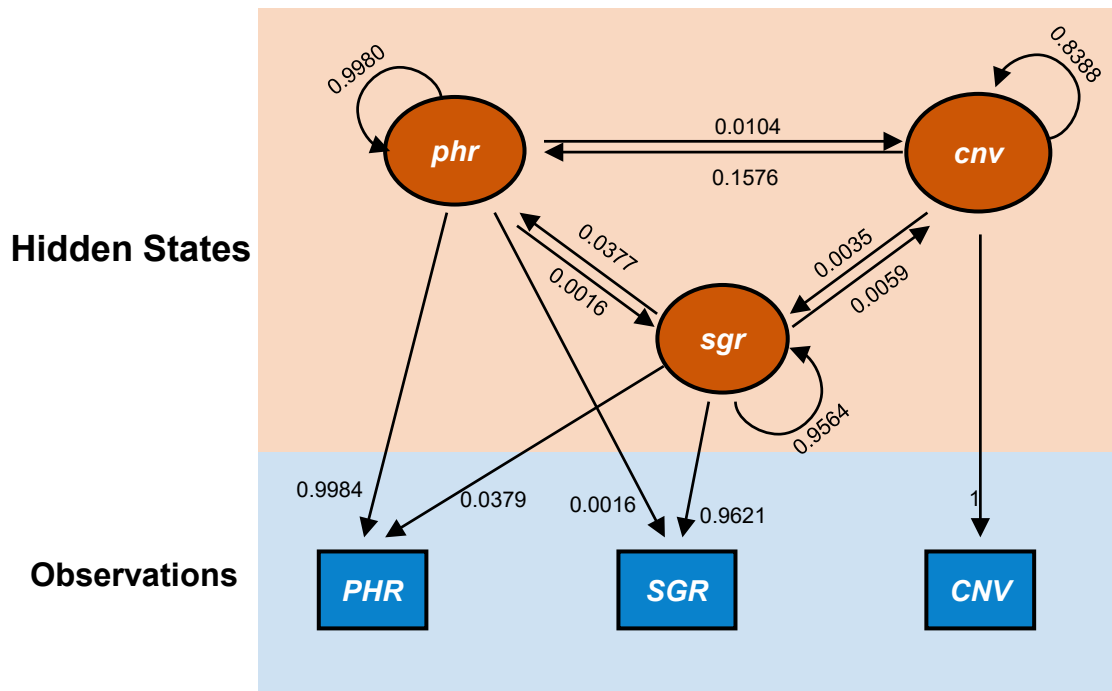

Supplemental Figure S11 Layout of the Hidden Markov Model. In the smoothing process, raw sharing statuses were considered as observations (*PHR*, *SGR* and *CNV* in blue zone), and the model was used to find their real status (*phr*, *sgr* and *cnv* in the orange) underlying potential noise signals. The transition (arrows between orange circles) probabilities and emission (arrows from orange circles to blue boxes) probabilities we used are annotated on the figure.

Abbreviations: *PHR*, polymorphism hotspot regions; *SGR*, Shared Genomic resource Regions; *CNV*, Copy number variation

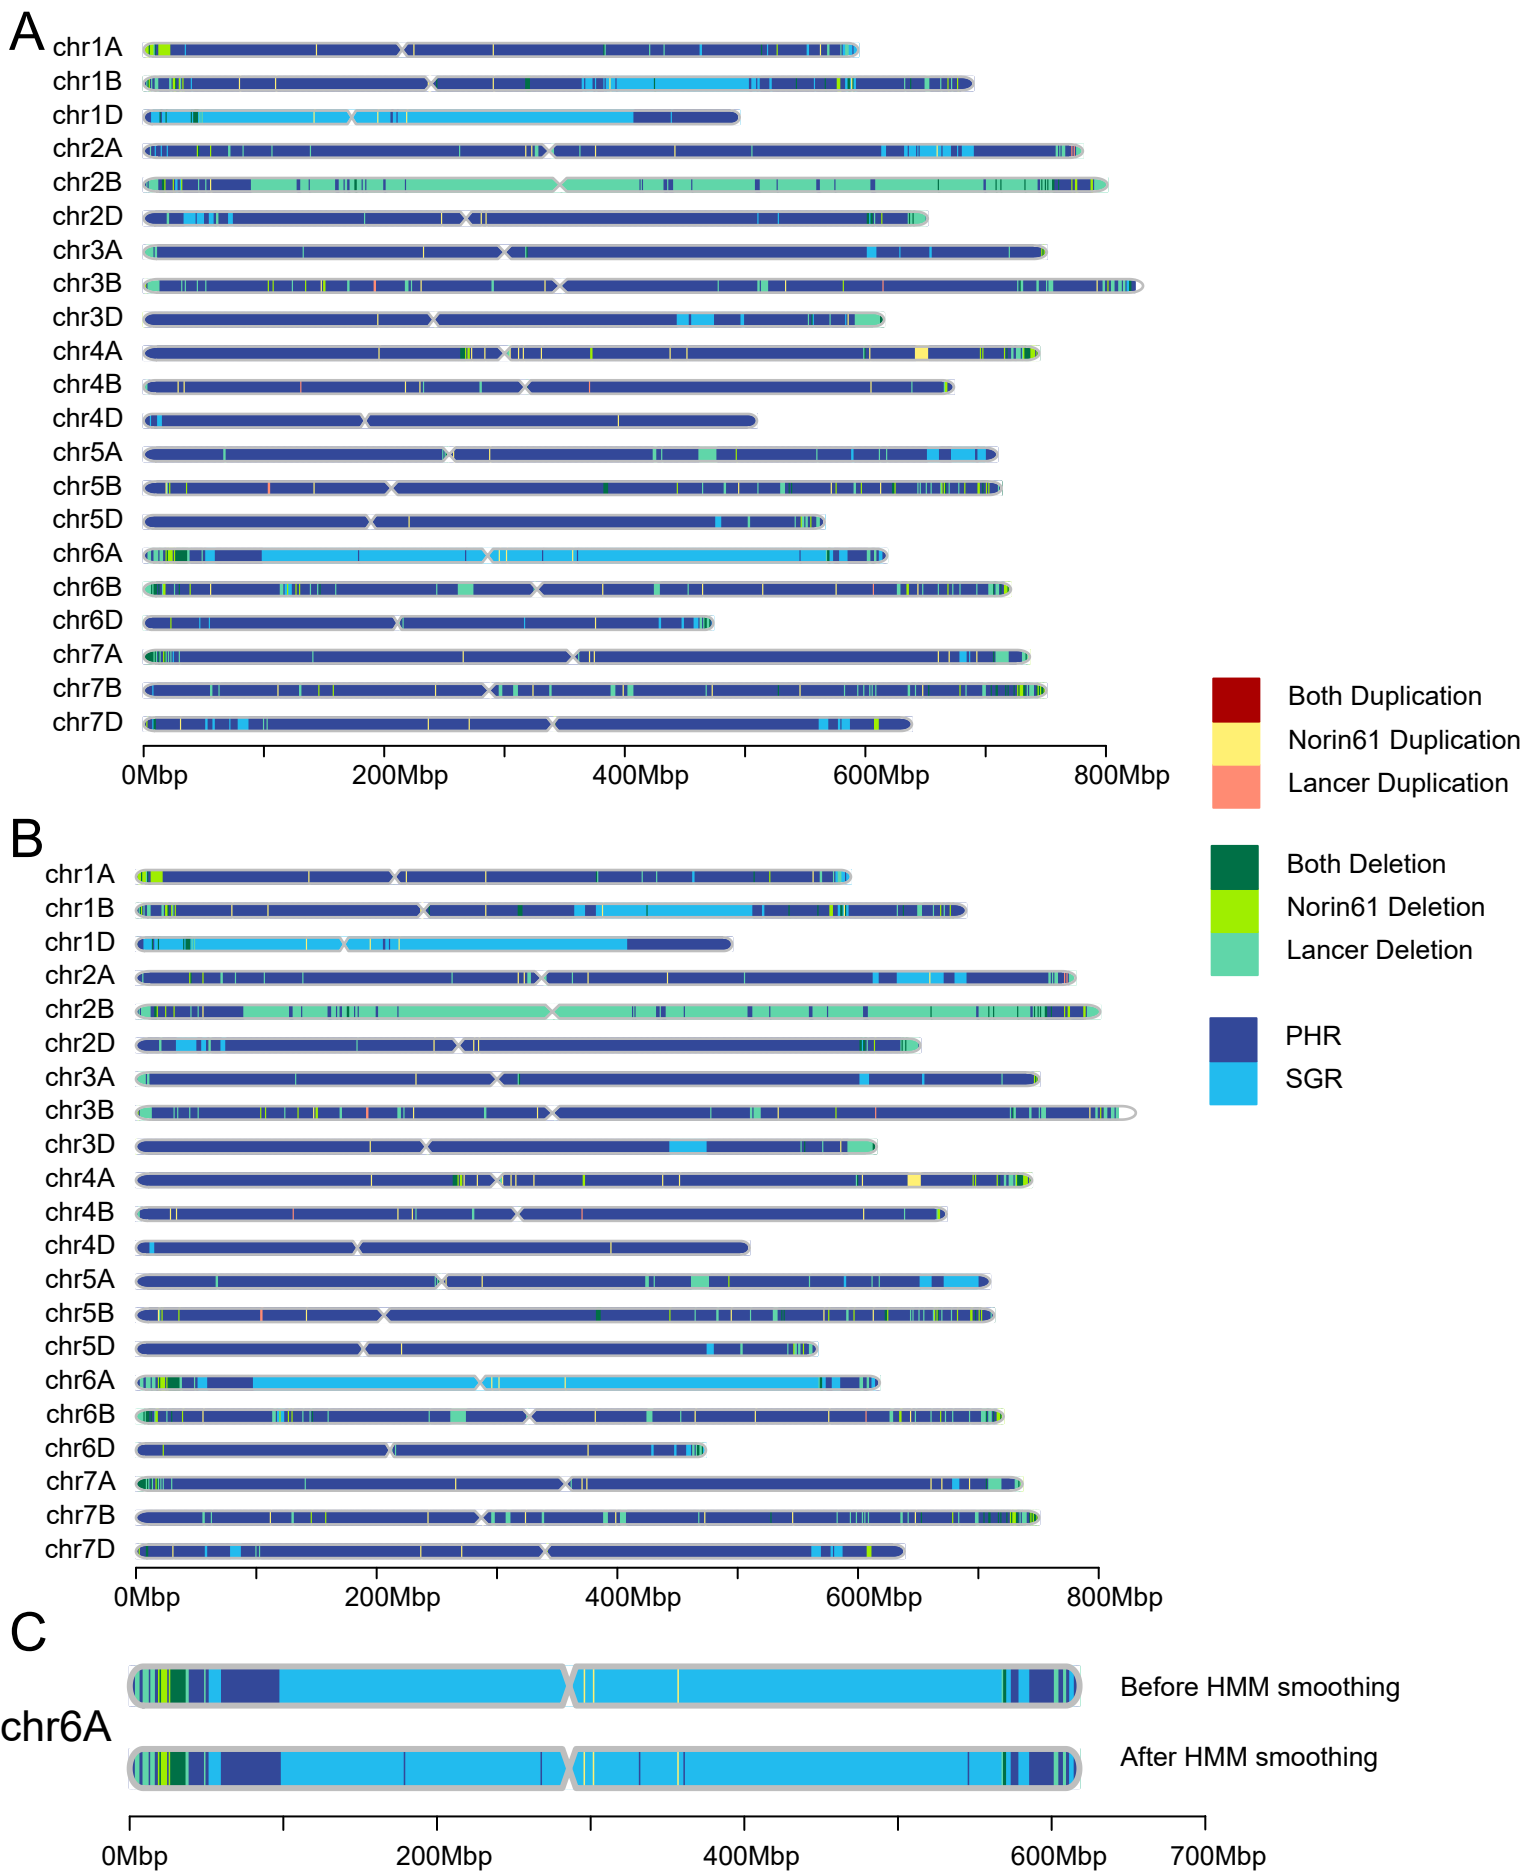

Supplemental Figure S12. Comparison of the distributions of PHR, SGR and CNV blocks between Lancer and Norin61 before and after applying HMM strategy. (A), before HMM smoothing. (B), after HMM smoothing. The chromosome 6A is highlighted in (C).

Abbreviations: PHR, polymorphism hotspot regions; SGR, Shared Genomic resource Regions; CNV, Copy number variation; HMM, Hidden Markov Model



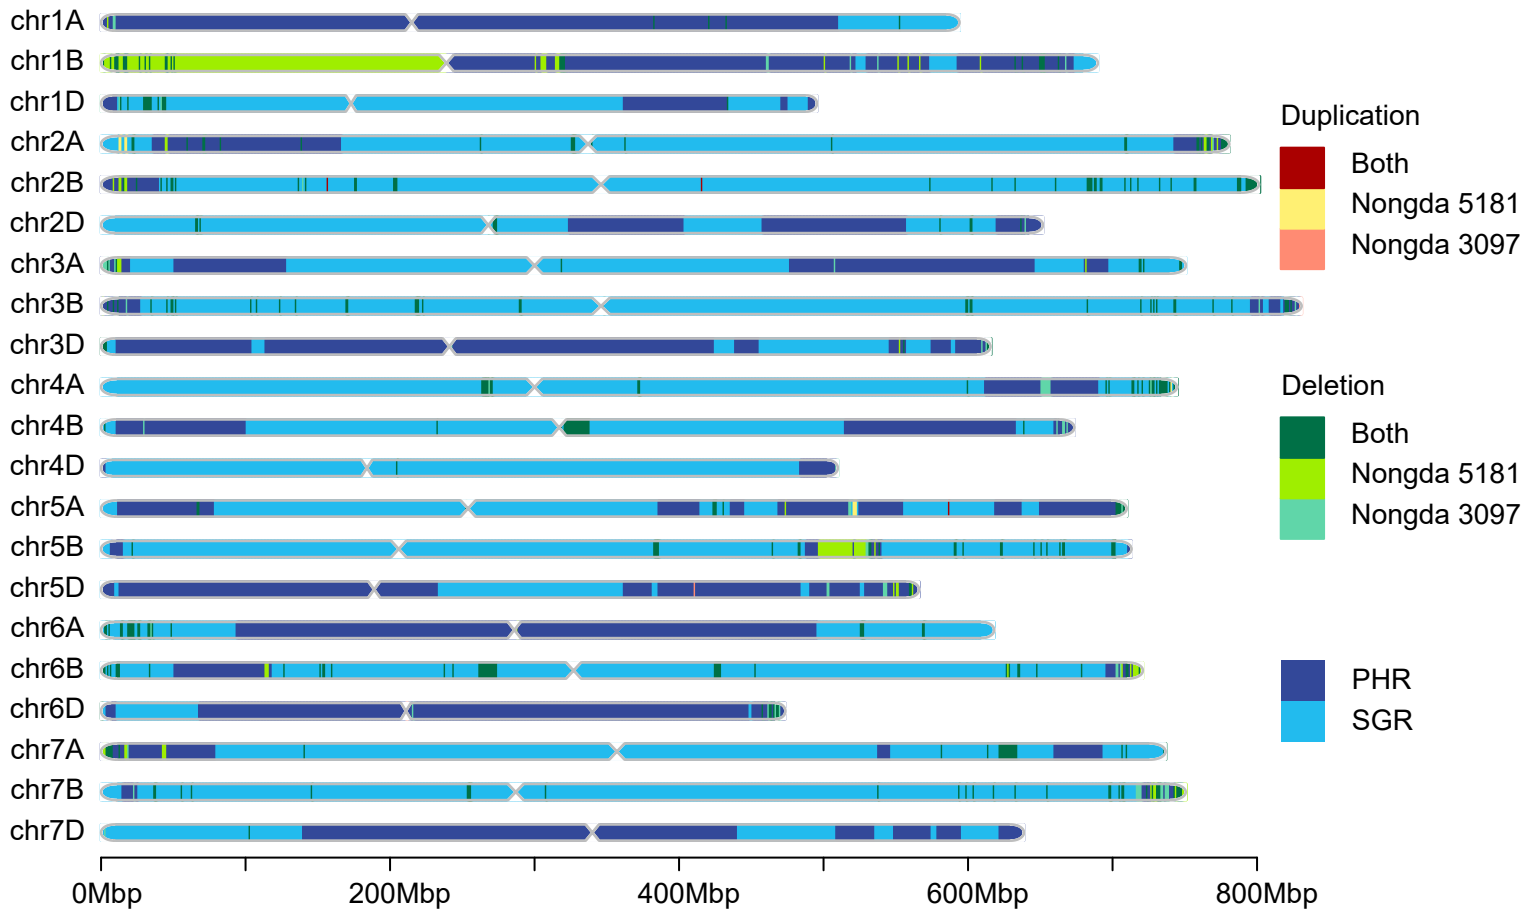

Supplemental Figure S13. Distribution of PHR, SGR and CNV blocks between Nongda5181 and Nongda3097.

Abbreviations: PHR, polymorphism hotspot regions; SGR, Shared Genomic resource Regions; CNV, Copy number variation;

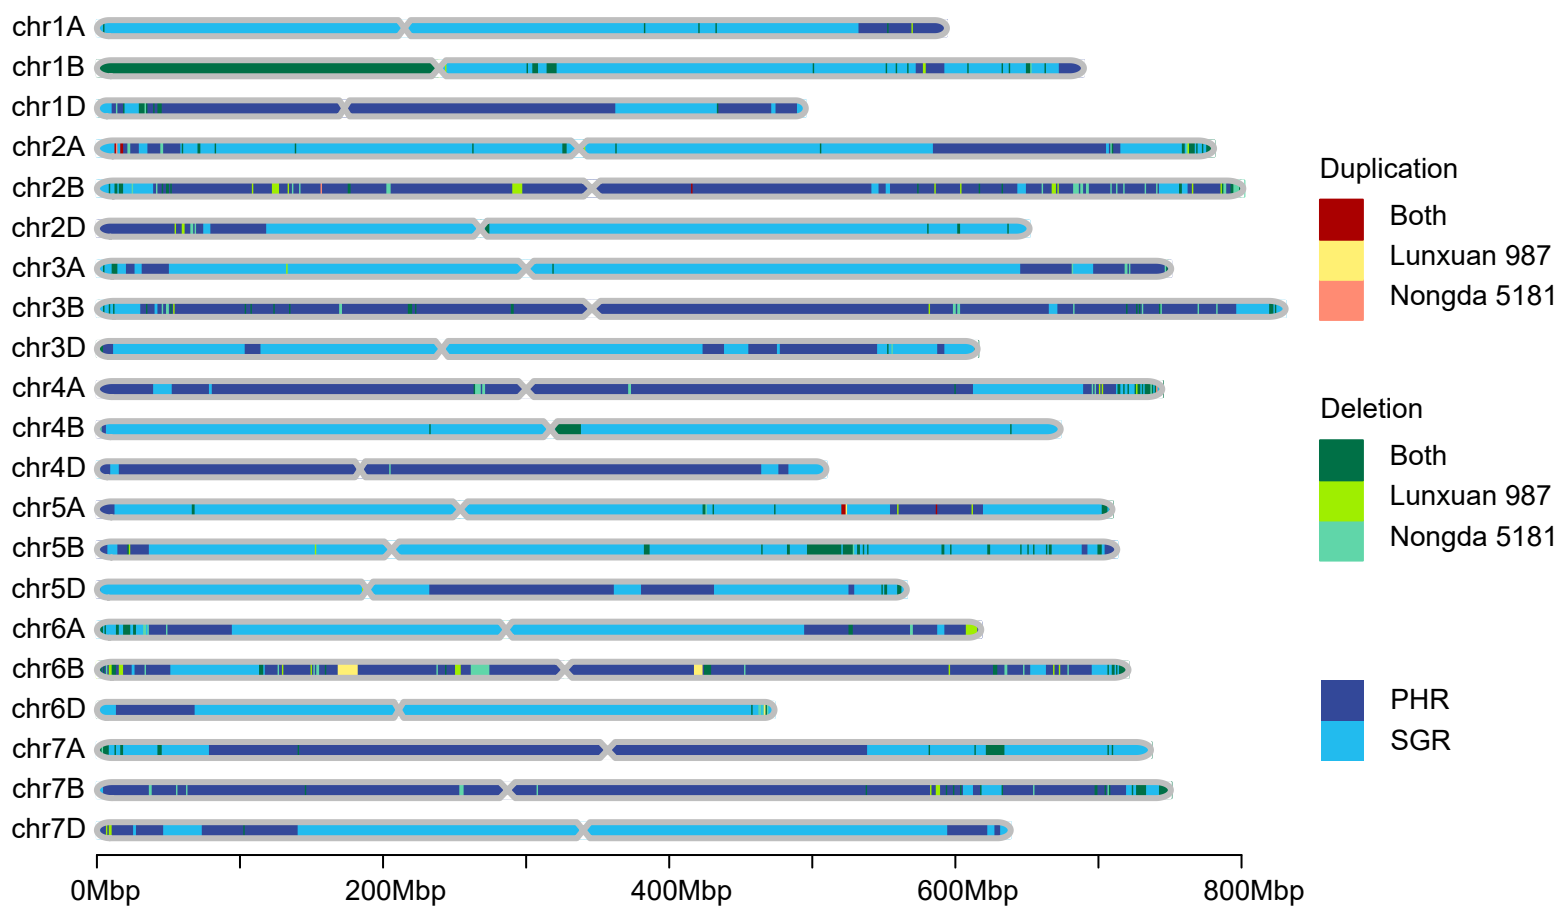

Supplemental Figure S14 Distribution of PHR, SGR and CNV blocks between Nongda5181 and Lunxuan987.

Abbreviations: PHR, polymorphism hotspot regions; SGR, Shared Genomic resource Regions; CNV, Copy number variation;

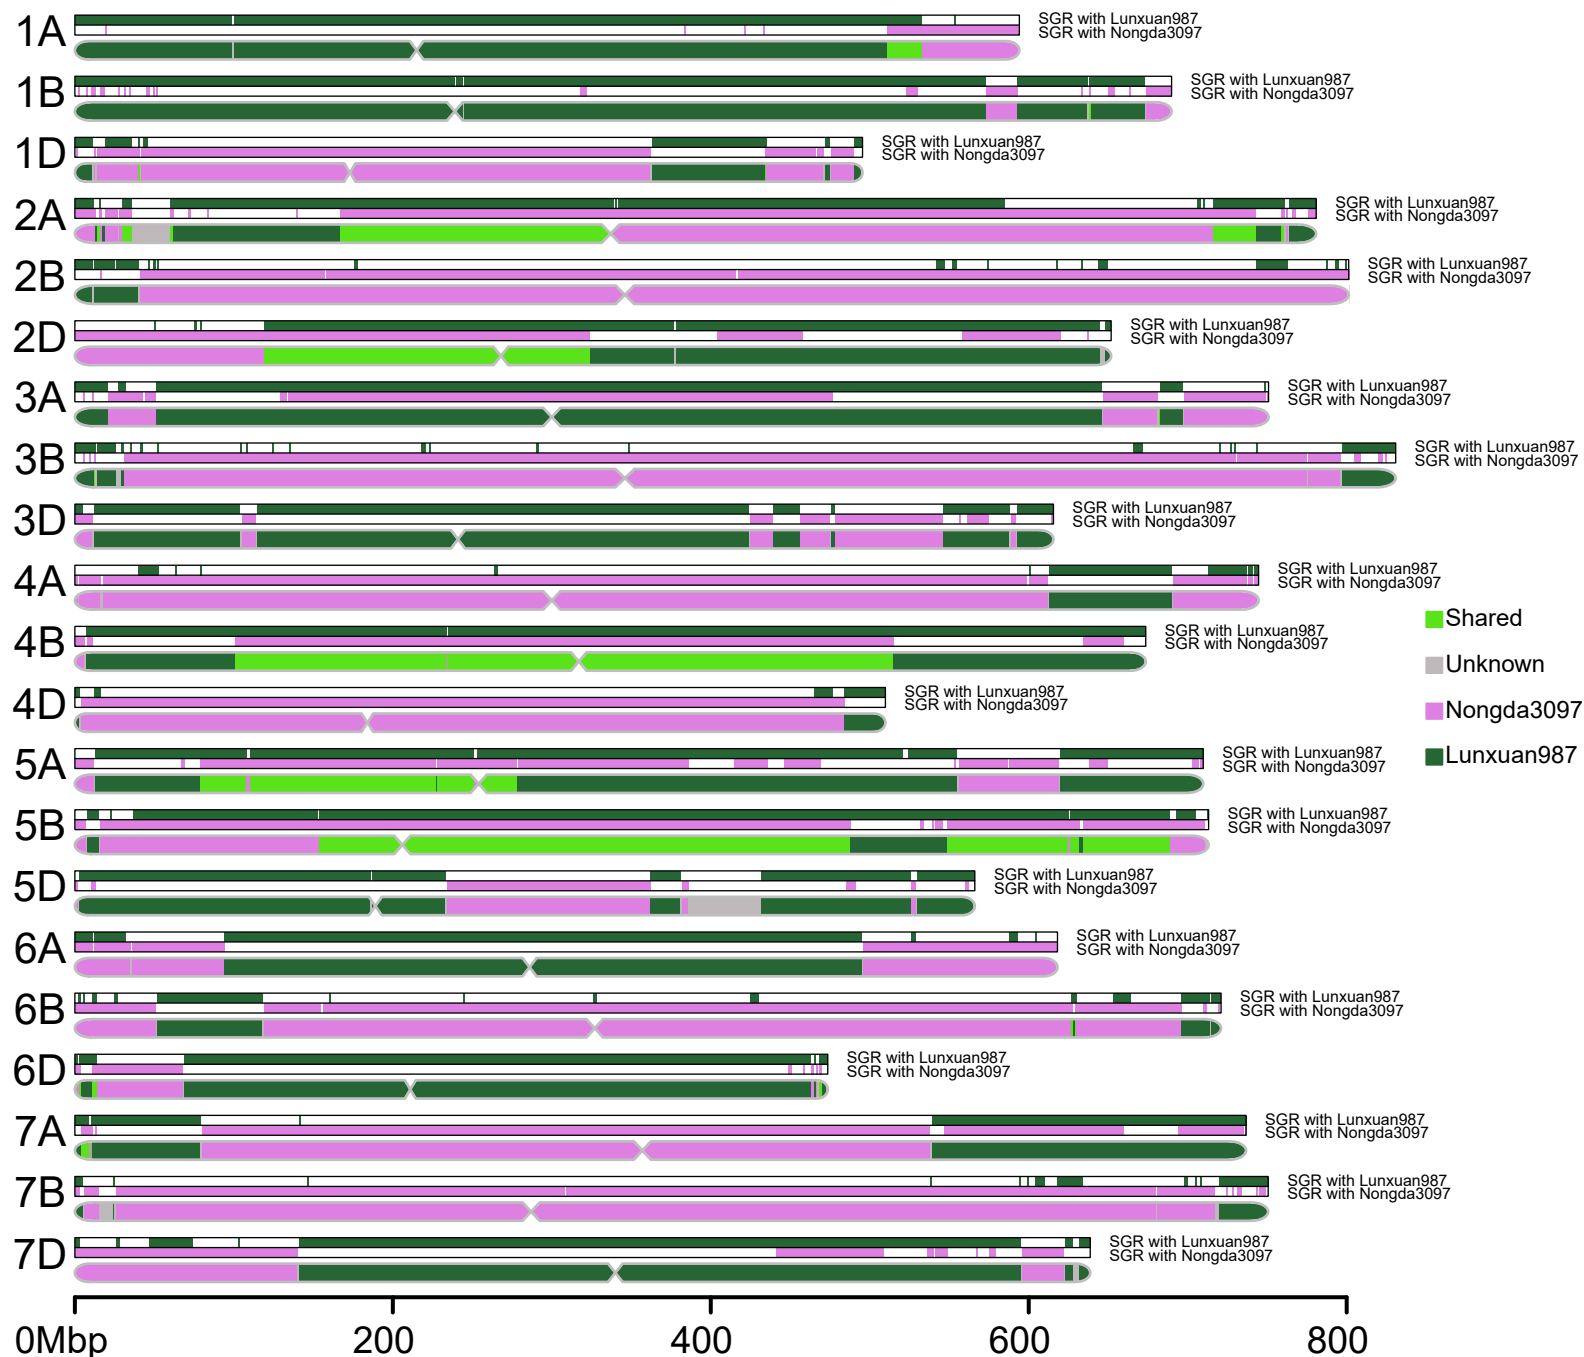

Supplemental Figure S15. Dissect the inherited genomic blocks of Nongda5181 from parents. The bottom chromosome-shape track is the recombination events of Nongda5181 from its parental lines, Nongda987 (purple) and Nongda3097 (green). The source of genomic blocks shared between Nongda3097 and Lunxuan987 in Nongda5181 is determined by the donor of adjacent regions.

Abbreviation: SGR, Shared Genomic resource Regions;

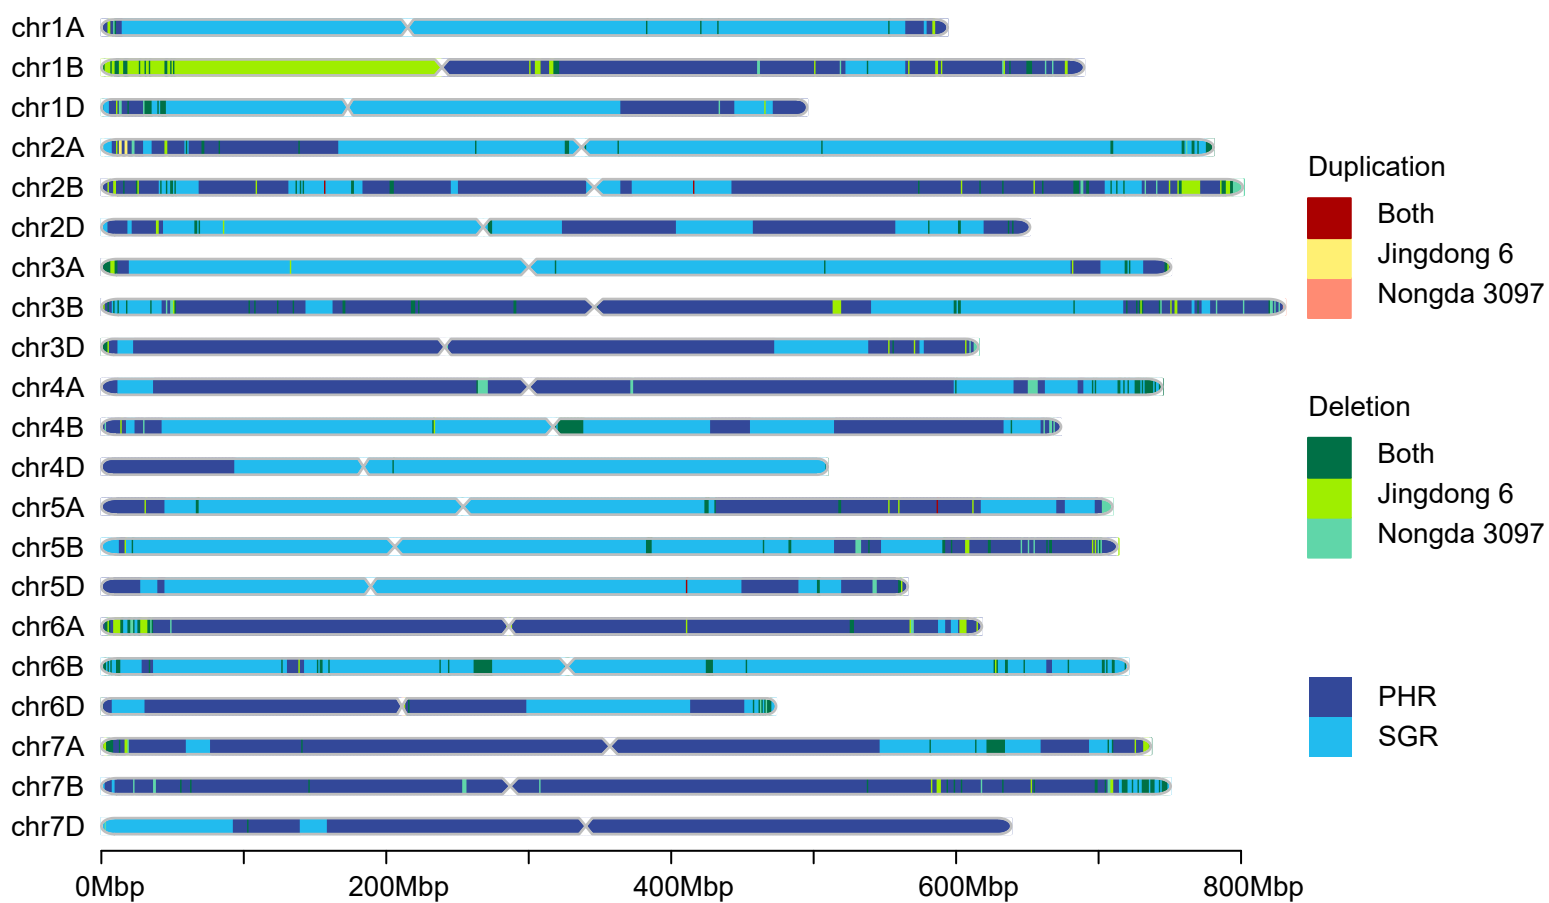

Supplemental Figure S16 Distribution of PHR, SGR and CNV blocks between Nongda3097 and Jingdong6.

Abbreviations: PHR, polymorphism hotspot regions; SGR, Shared Genomic resource Regions; CNV, Copy number variation;

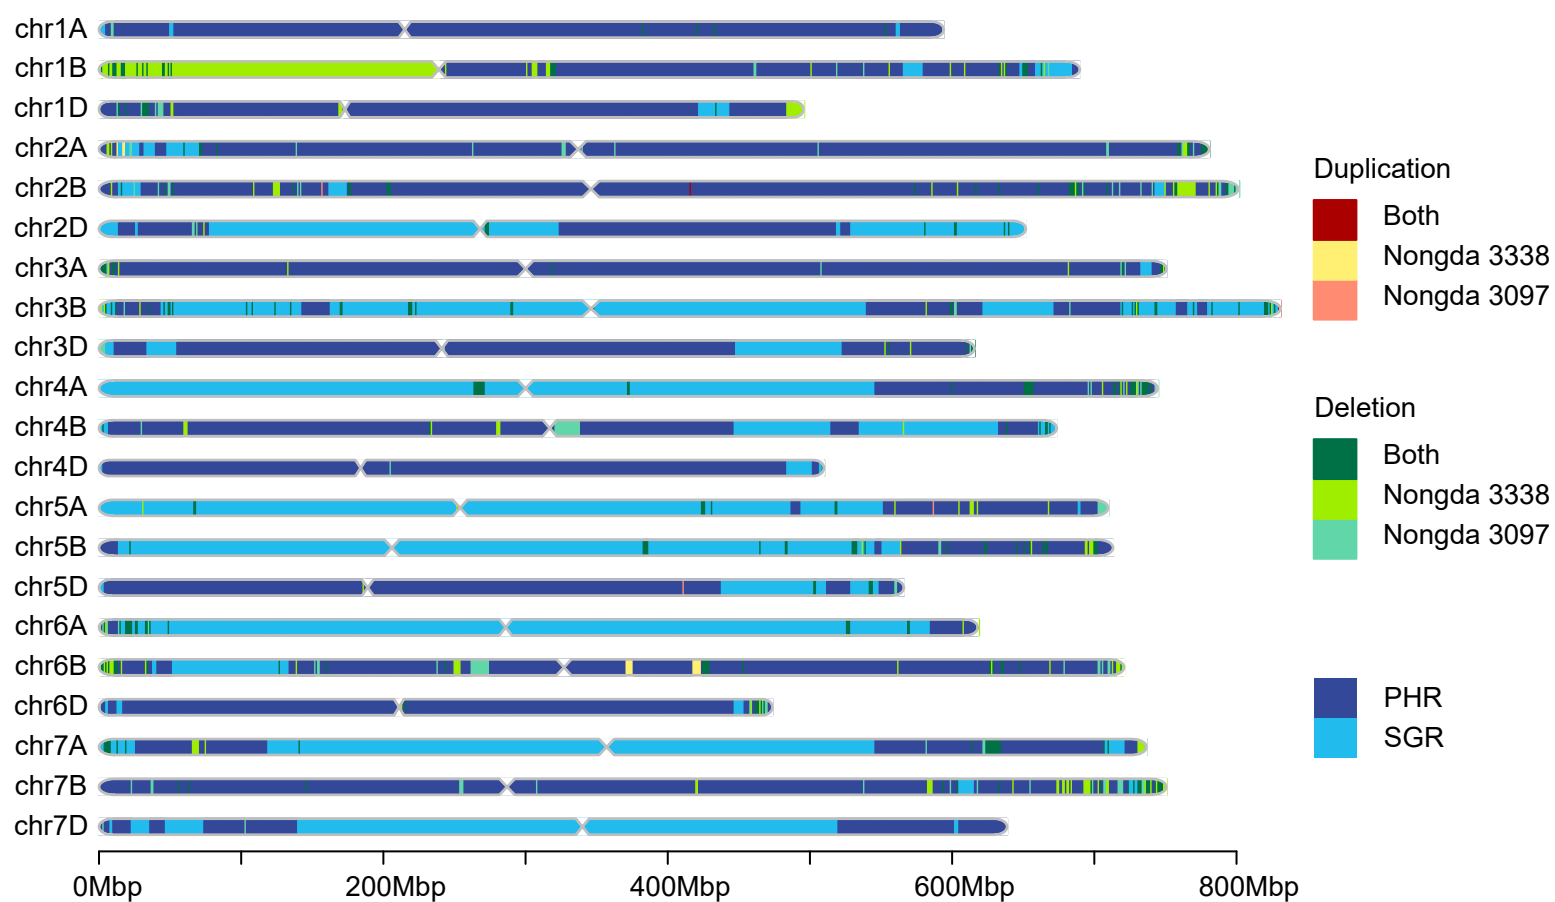

Supplemental Figure S17 Distribution of PHR, SGR and CNV blocks between Nongda3097 and Nongda3338.

Abbreviations: PHR, polymorphism hotspot regions; SGR, Shared Genomic resource Regions; CNV, Copy number variation;

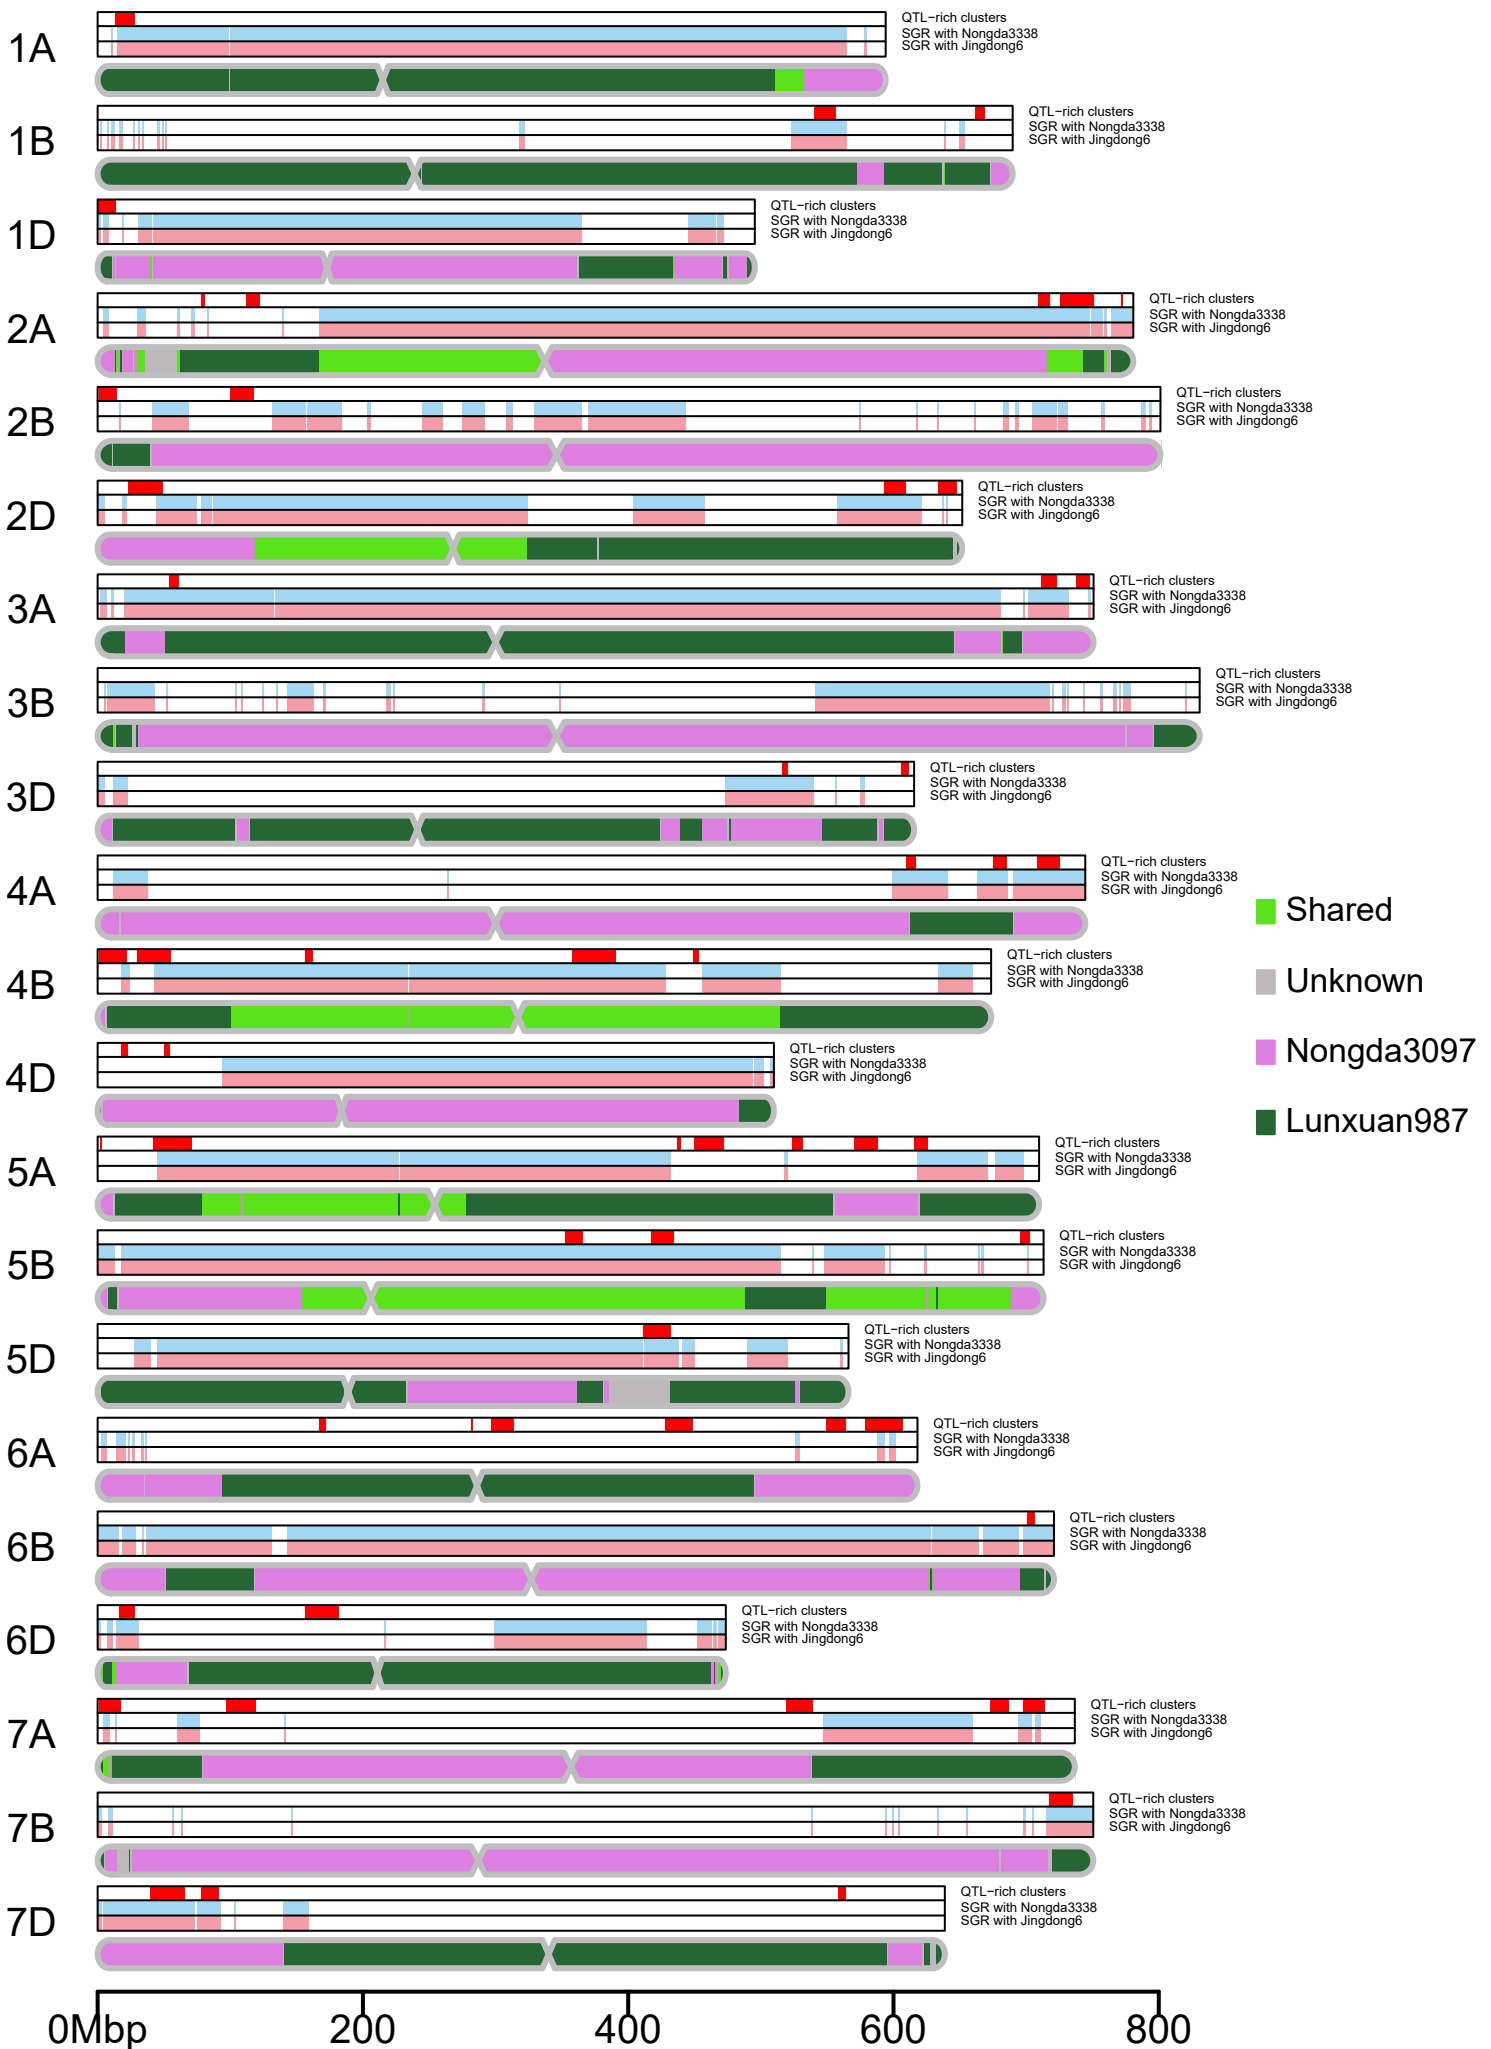

Supplemental Figure S18 Dissect the inherited genomic blocks of Nongda5181. The bottom chromosome-shape track, reconstructed recombination events of Nongda5181 from its parental lines, Nongda987 (purple) and Nongda3097 (green). Descended blocks from great-grandparental line Nongda3338 (blue) and grandparental line Jingdong6 (pink) were showed in independent tracks. QTL-rich cluster annotated by Cao et al. are marked (red track). Abbreviation: SGR, Shared Genomic resource Regions;

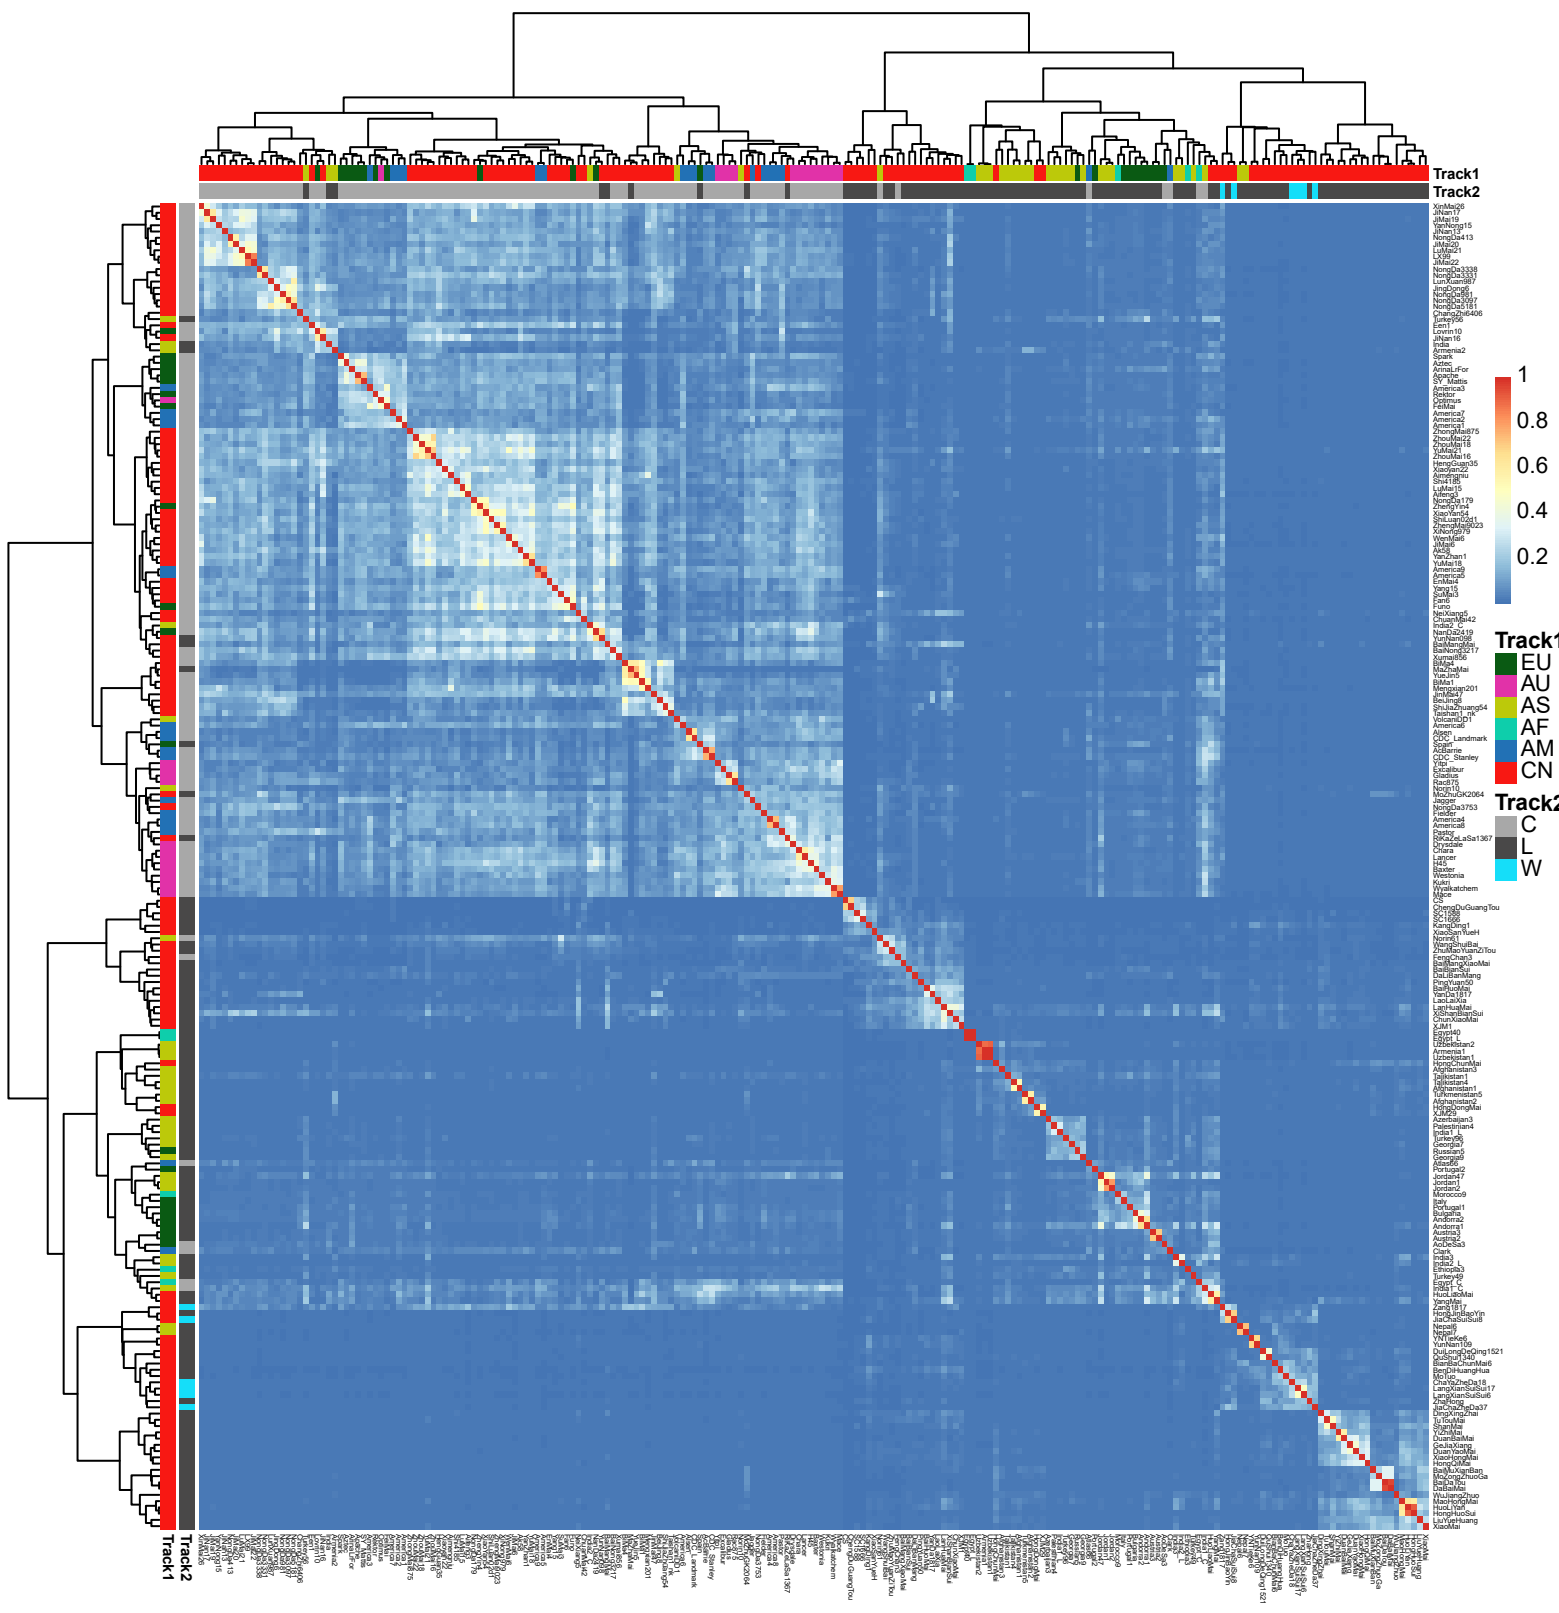

Supplemental Figure S19 Genome similarity hierarchical clustering based on ward's hierarchical clustering method on a scale of  $\log_2(\text{gIBD proportion})$ . CN, Chinese accessions; EU, European accessions; AU, Australian accessions; AF: African accessions; AM, American accessions. C, cultivar; L, landrace; W: semi-wild. Heat map shows the value of  $\log_2(1/\text{gIBD proportion})$  between each accession.

Abbreviation: gIBD, germplasm resource-based Identity-By-Descent

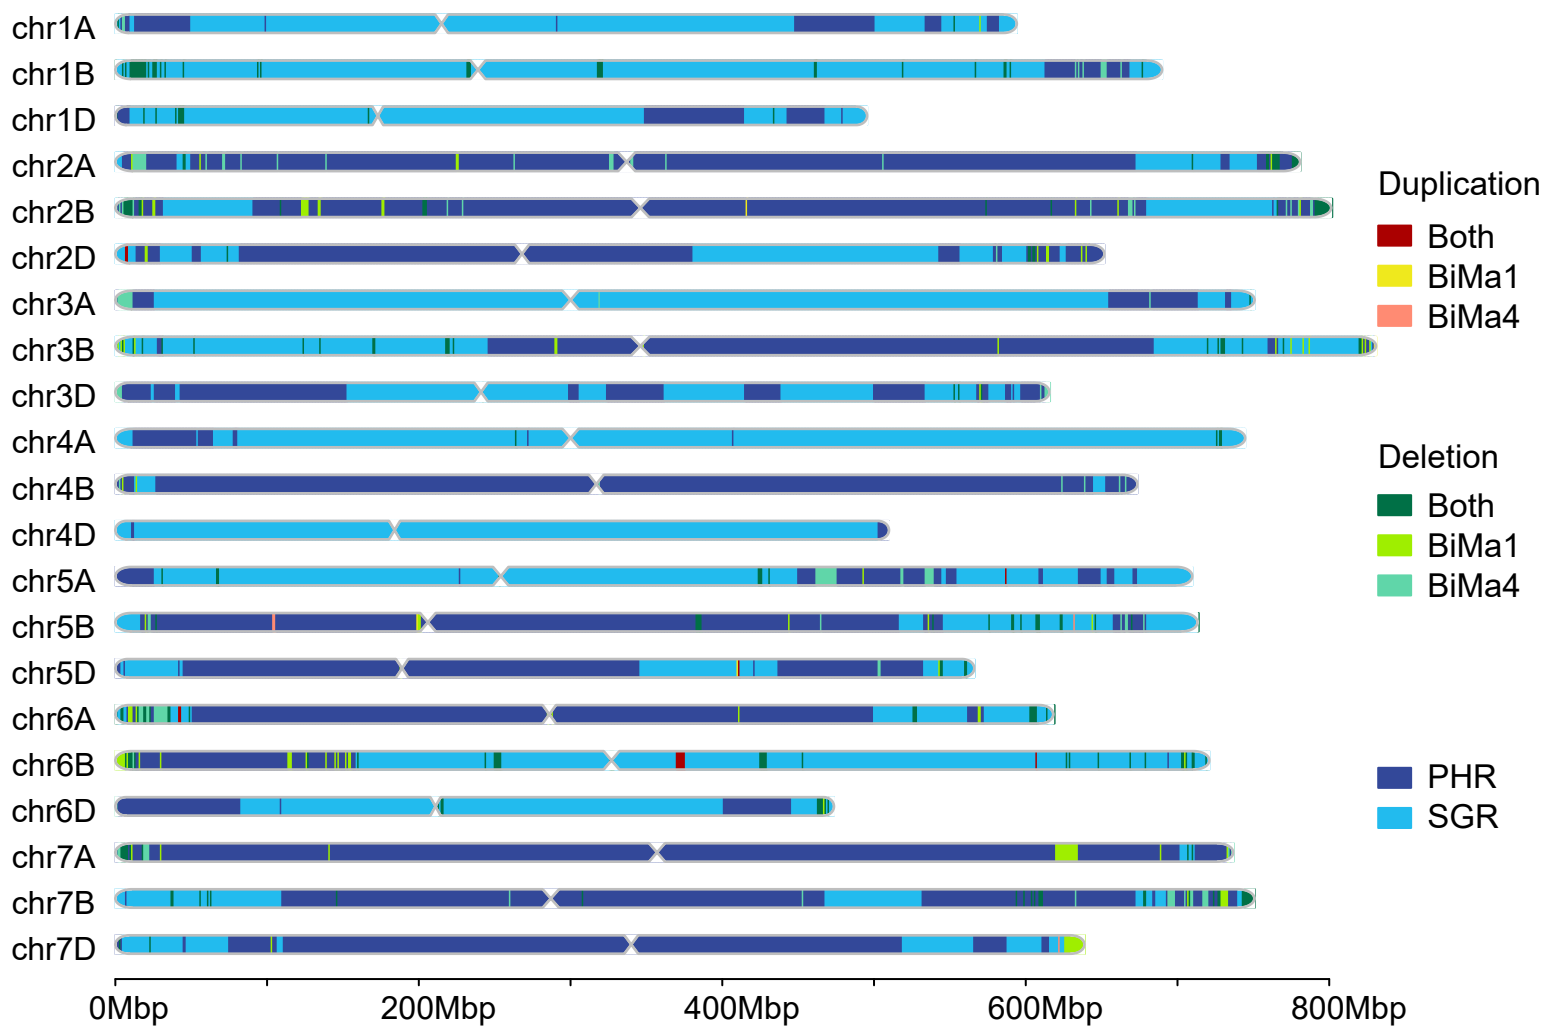

Supplemental Figure S20. Distribution of PHR, SGR and CNV blocks between Bima1 and Bima4.

Abbreviations: PHR, polymorphism hotspot regions; SGR, Shared Genomic resource Regions; CNV, Copy number variation;



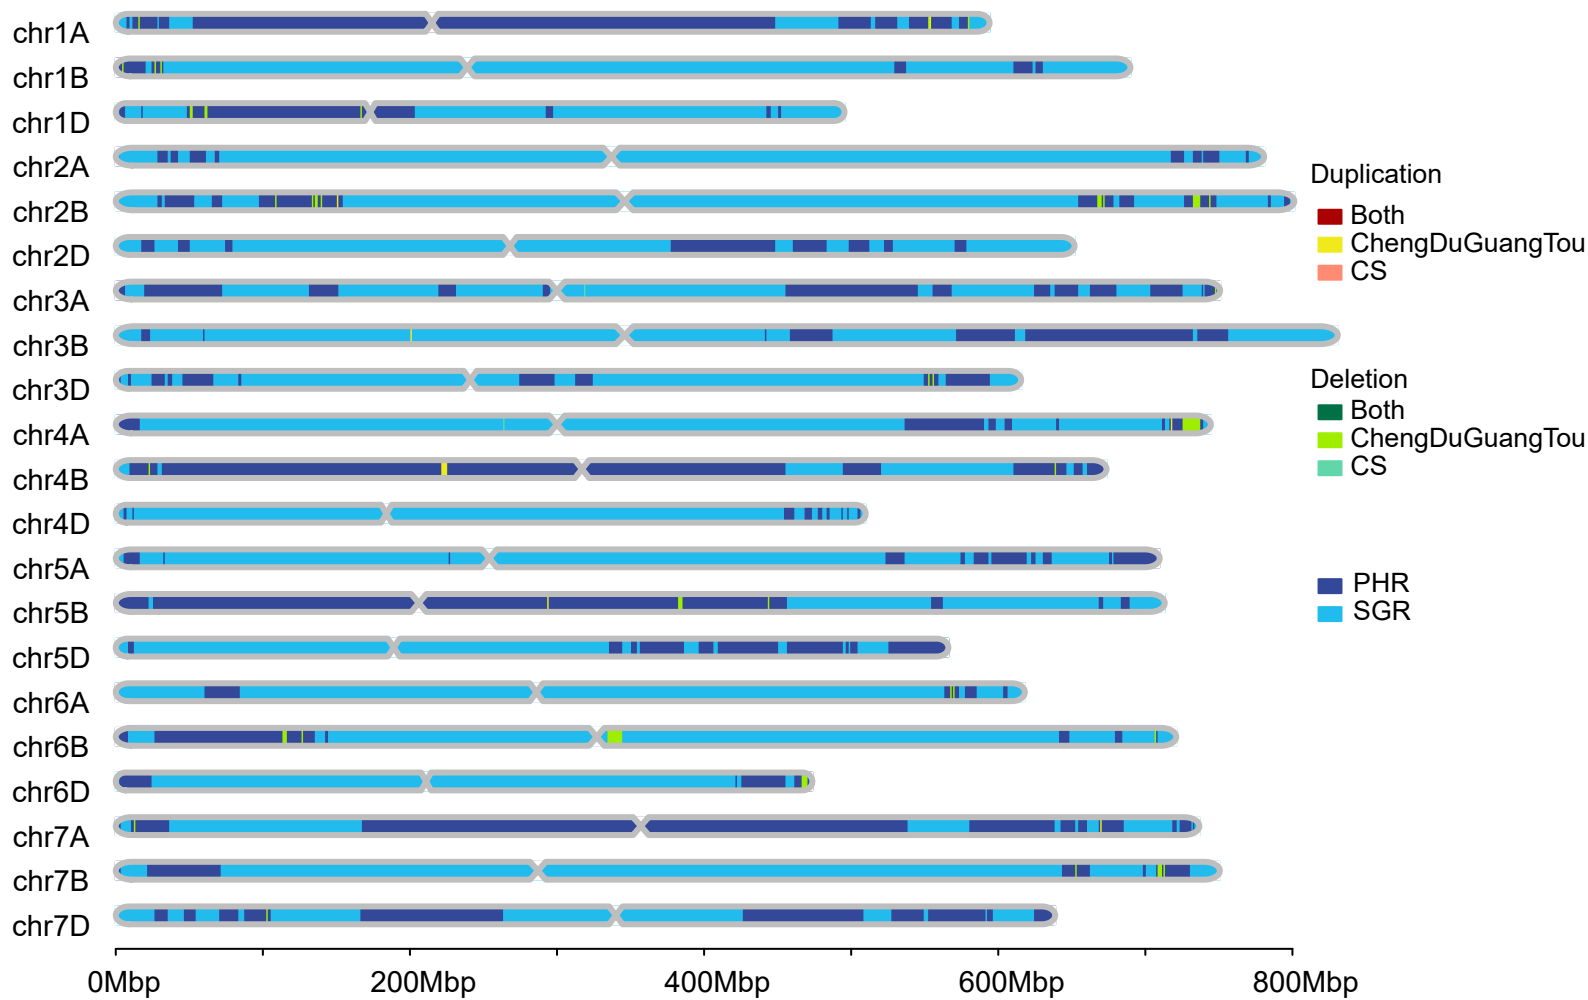

Supplemental Figure S21 Distribution of PHR, SGR and CNV blocks between Chengduguangtou and CS (Chinese Spring).

Abbreviations: PHR, polymorphism hotspot regions; SGR, Shared Genomic resource Regions; CNV, Copy number variation

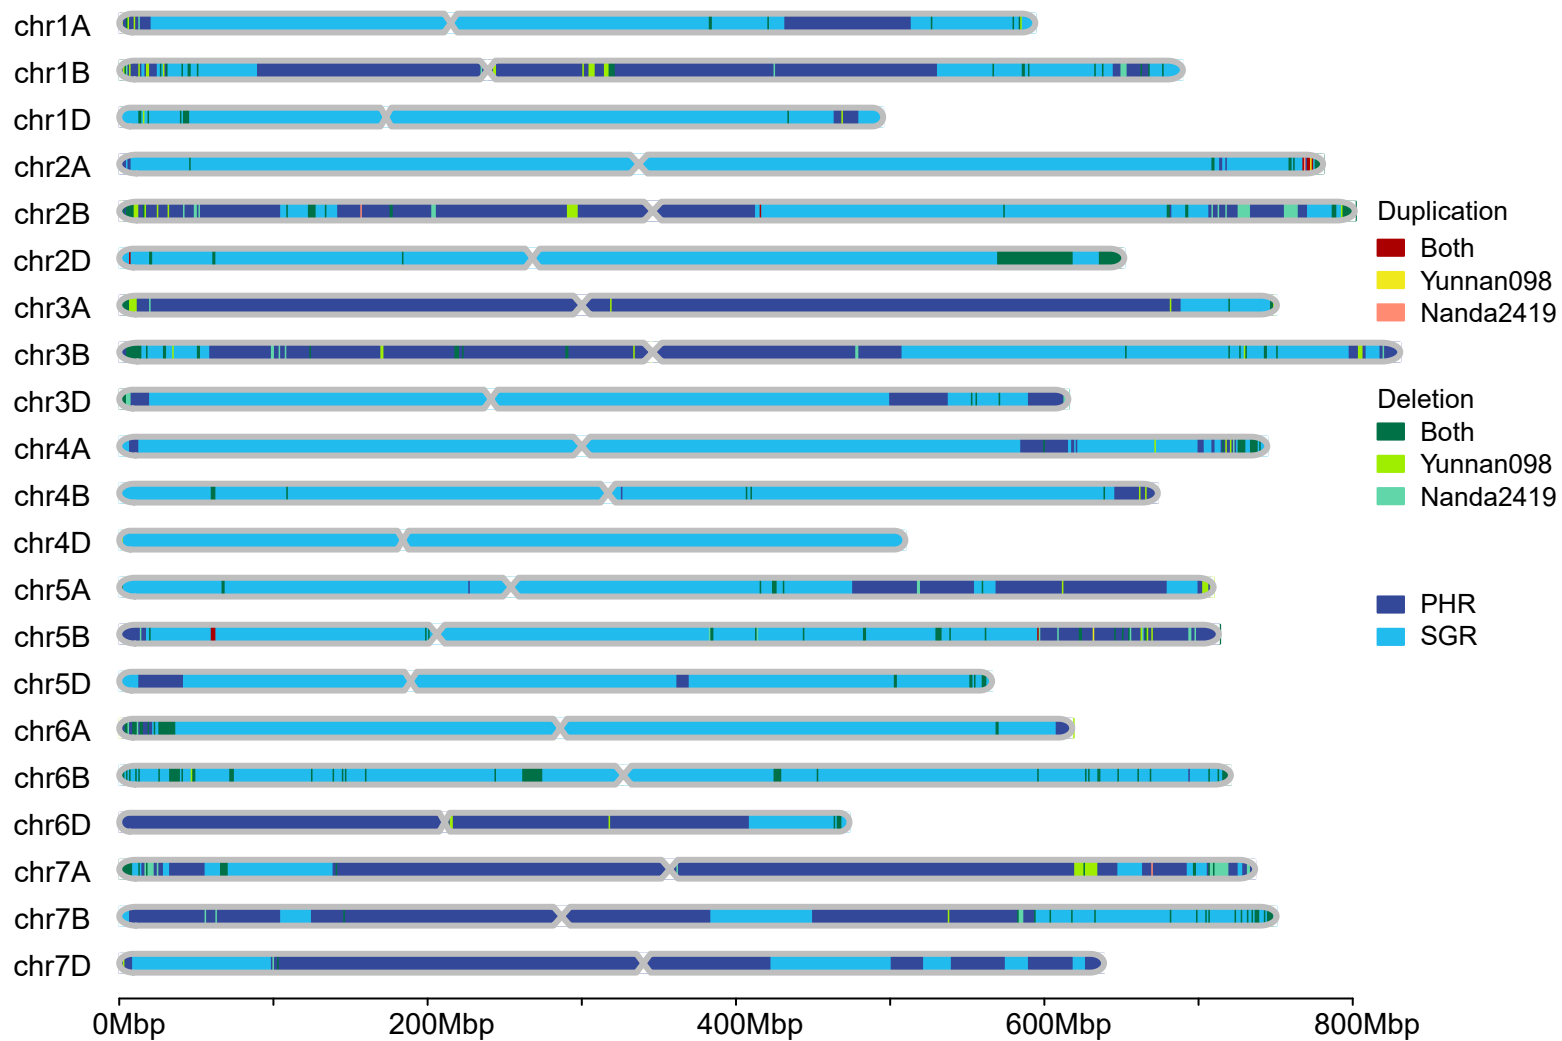

Supplemental Figure S22 Distribution of PHR, SGR and CNV blocks between Yunnan098 and Nanda2419.

Abbreviations: PHR, polymorphism hotspot regions; SGR, Shared Genomic resource Regions; CNV, Copy number variation;

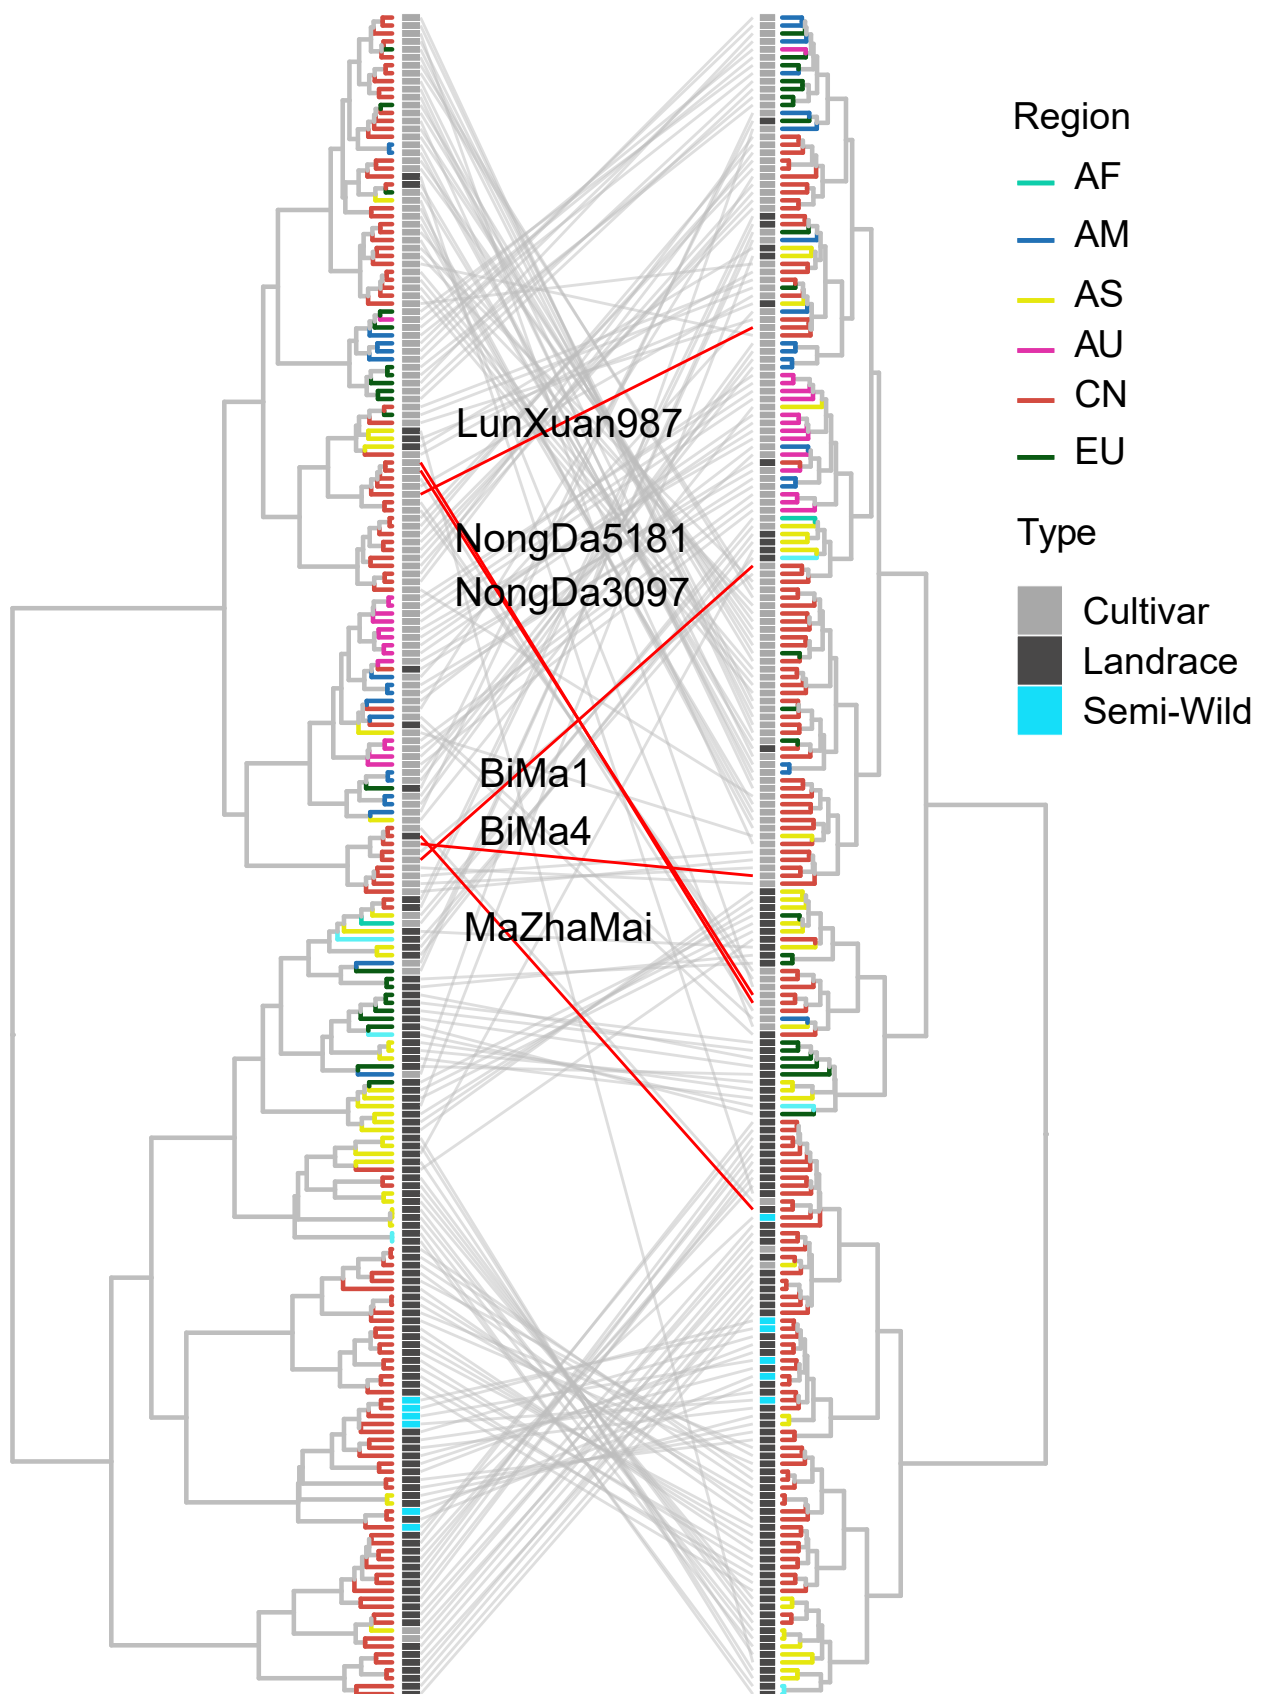

Supplemental Figure S23 Comparison between gIBD-based (left) and IBS-based (right) hierarchical clustering results. Both trees based on ward's hierarchical clustering method and gIBD-based tree on a scale of  $\log_2(1/\text{gIBD proportion})$ . Leaves are colored based on regions of accessions. CN, Chinese accessions; EU, European accessions; AU, Australian accessions; AF: African accessions; AM, American accessions.

Abbreviations: gIBD, germplasm resource-based Identity-By-Descent; IBS, identical by state

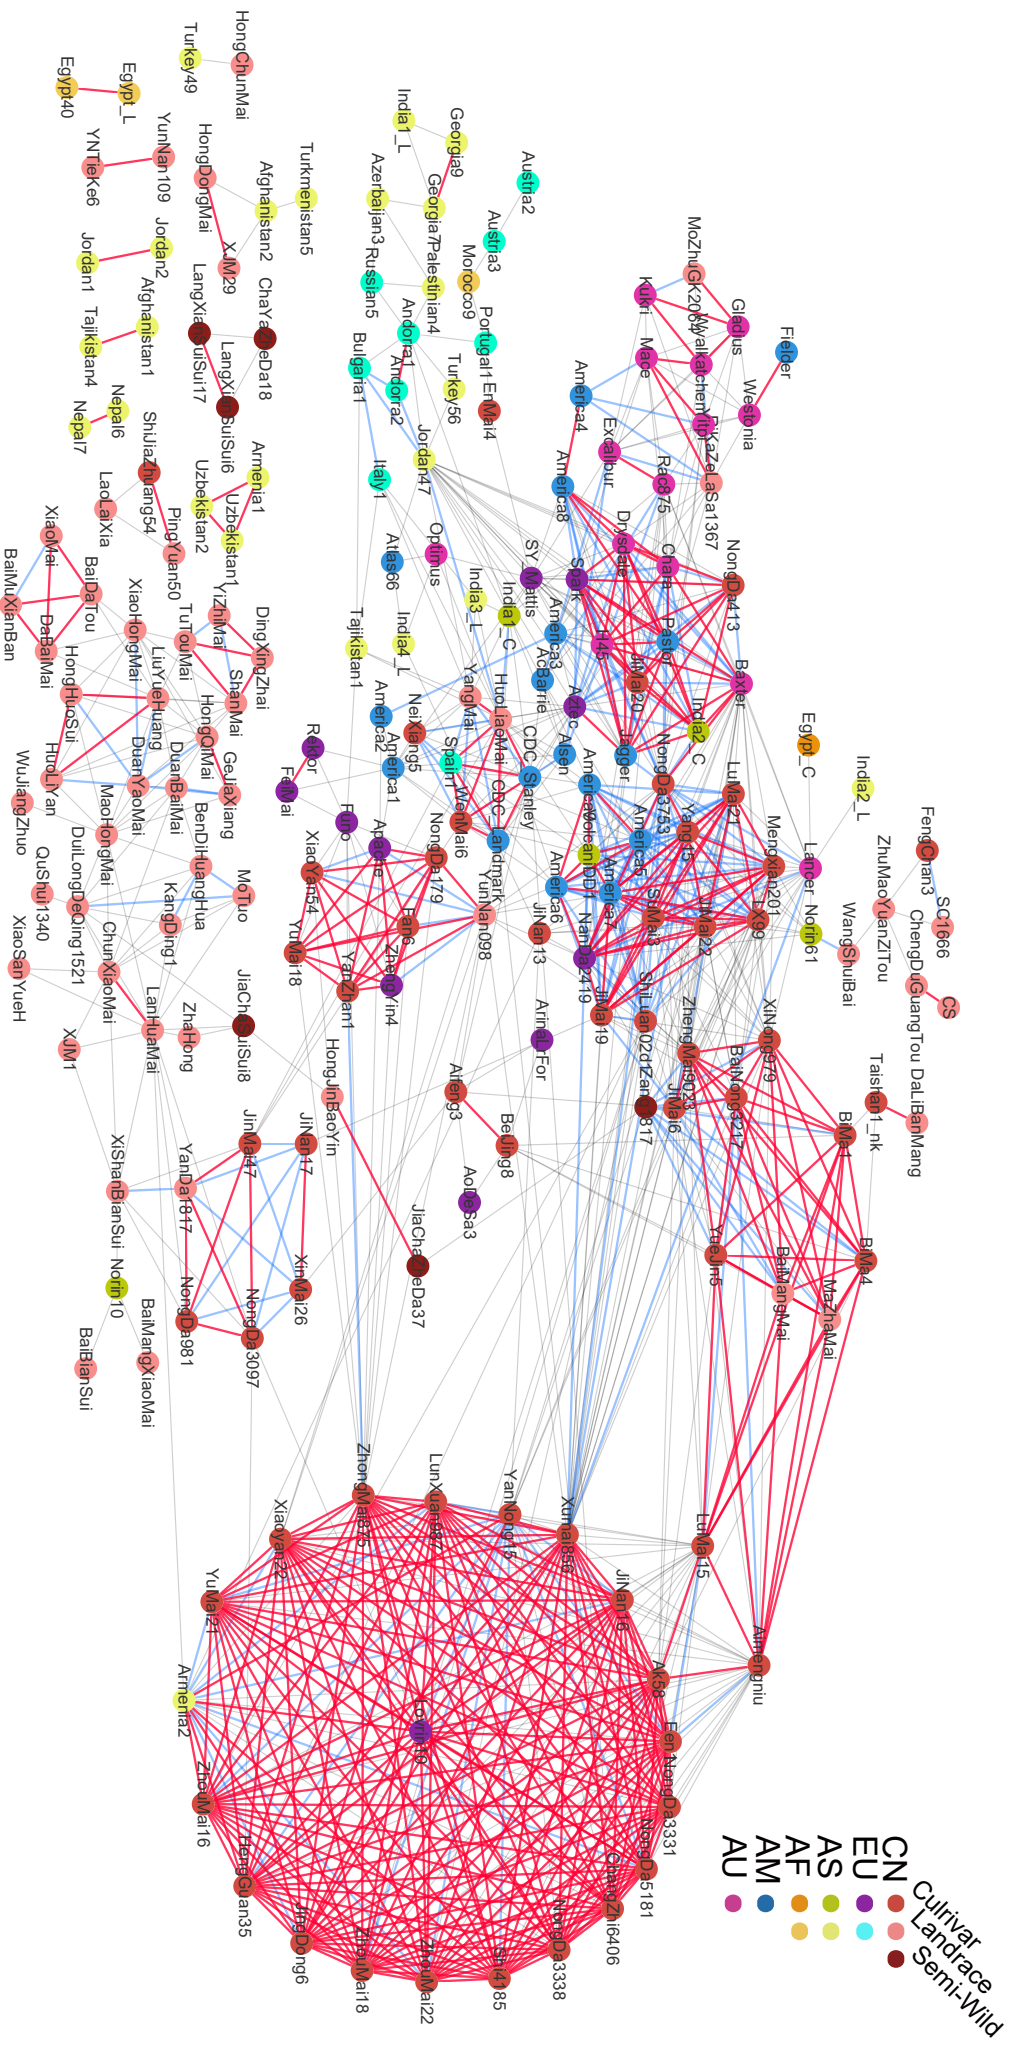

Supplemental Figure S24. The chromosome scale GNet of 1B chromosome. The edge colours indicate the ranges of the gIBD

ratio (genome similarity) for accession pairs. Blue edges:  $50\% \geq \text{gIBD-ratio} \geq 40\%$ ; Red edges:  $\text{gIBD-ratio} \geq 50\%$ . A node represents an accession  
 The right annotation bar shows the geographic origin (CN, Chinese accessions; EU, European accessions; AU, Australian accessions;  
 AF: African accessions; AM, American accessions) and historical groups (cultivar, landrace, semi-wild) of each accession.

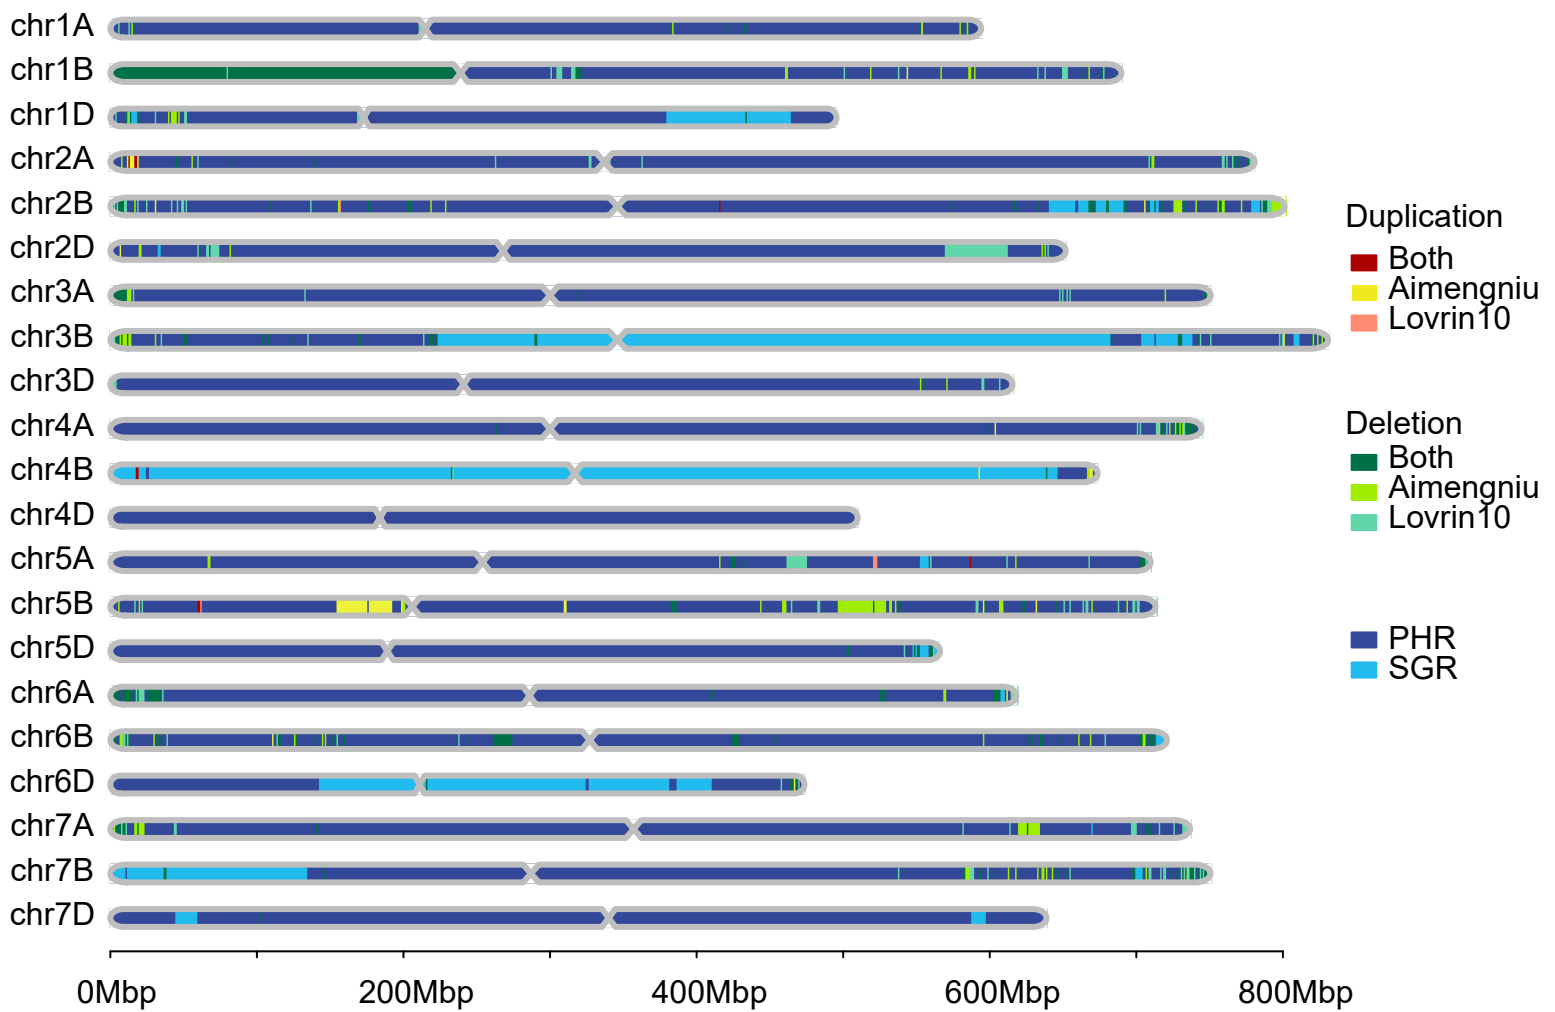

Supplemental Figure S25. Distribution of PHR, SGR and CNV blocks between Aimengniu and lovrin10.

Abbreviations: PHR, polymorphism hotspot regions; SGR, Shared Genomic resource Regions; CNV, Copy number variation;

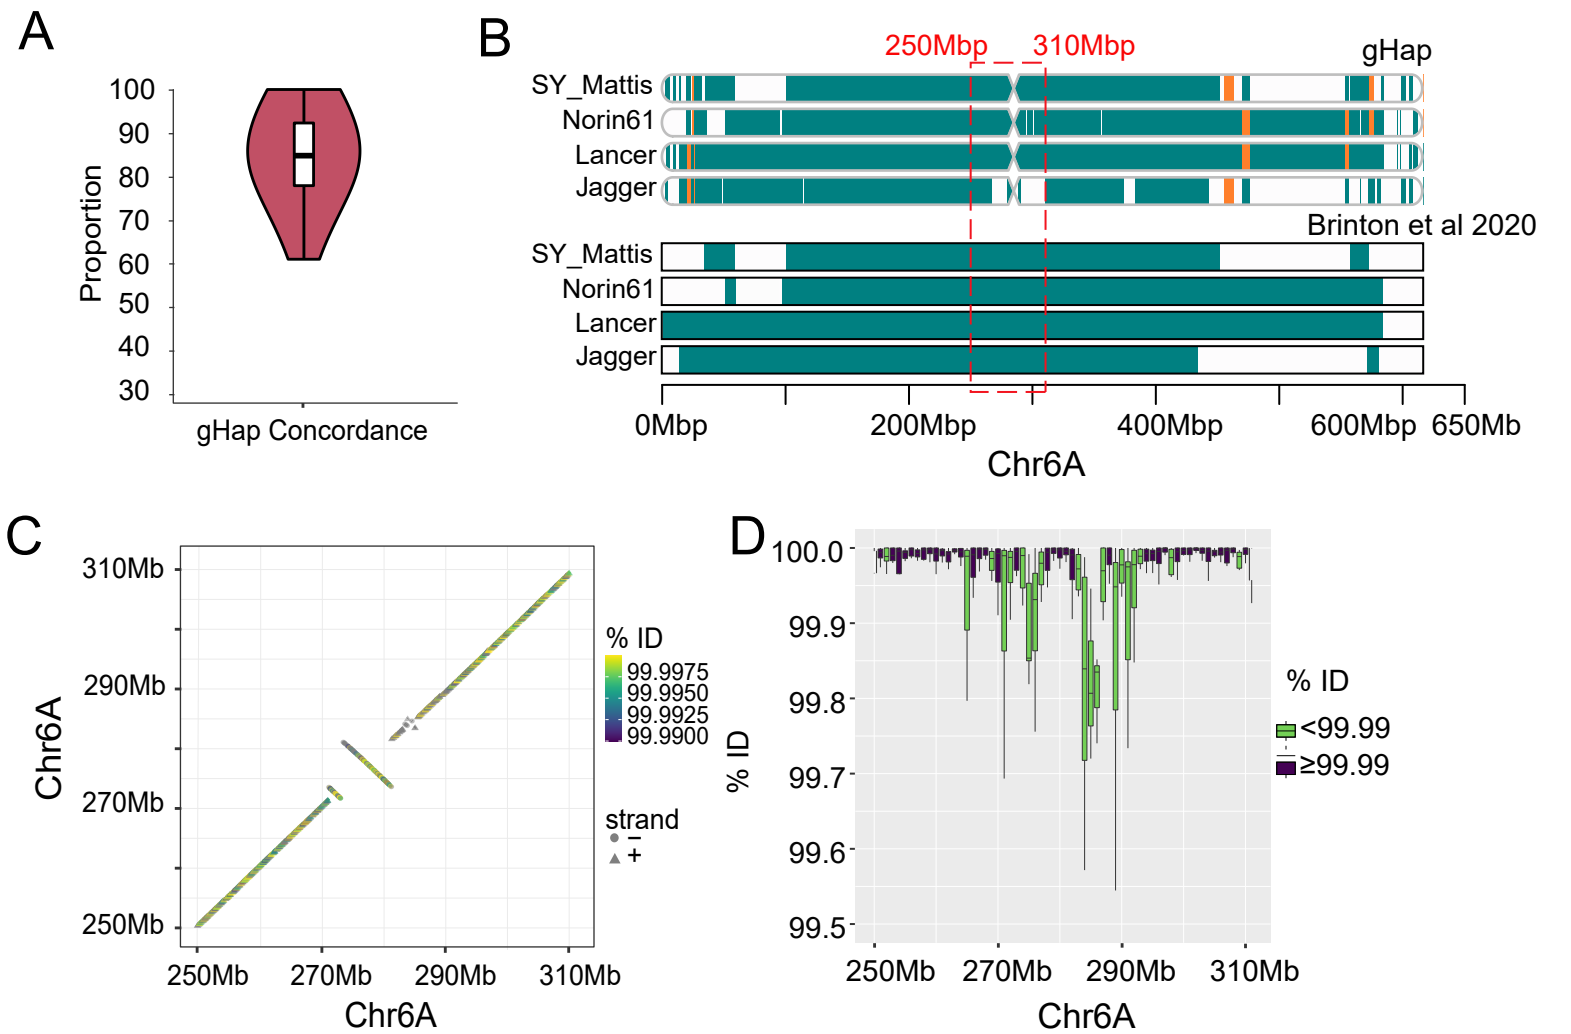

Supplemental Figure S26.

A, Distribution of concordance ratio between gHap and haplotype identified by Brinton et al. among ArinaLrFor, Jagger, Lancer, Landmark, Mace, Norin61, CDC Stanley and SY Mattis. The concordance ratio refers to the ratio between the haplotype length that both identified by gHap and Brinton et al. and the total haplotype length that identified by Brinton et al. in each sample pairs. B, Diagrammatic representation of all gHaps on chromosome 6A in the 4 accessions (upper) and haplotypes shared among 4 accessions defined in Brinton et al 2020 (lower). Regions with the same colour at the same position share common haplotypes (except for white regions which are not contained gHap blocks). C, NUCmer alignments ( $\geq 20$  Kbp length) between region highlighted by red dashed box in (B) of the Jagger and SY Mattis assemblies. Each data point represents a single pairwise alignment, with the position corresponding to the midpoint of the alignment with respect to the Jagger (x-axis) and SY Mattis (y-axis) assemblies. D, Boxplots show the pairwise NUCmer alignments between chr6A of Jagger and SY Mattis from (B) grouped into 5-Mbp bins with respect to the position in the SY Mattis assembly. Purple-filled boxplots indicate bin median  $\geq 99.99\%$  sequence identity and green-filled boxplots indicate bin median  $< 99.99\%$  sequence identity. E, Diagrammatic representation of all gHaps on chromosome 6A pythiscal position from 200Mb to 400Mb in the 8 accessions. Regions with the same colour at the same position share common haplotypes (except for white regions which are not contained gHap blocks).



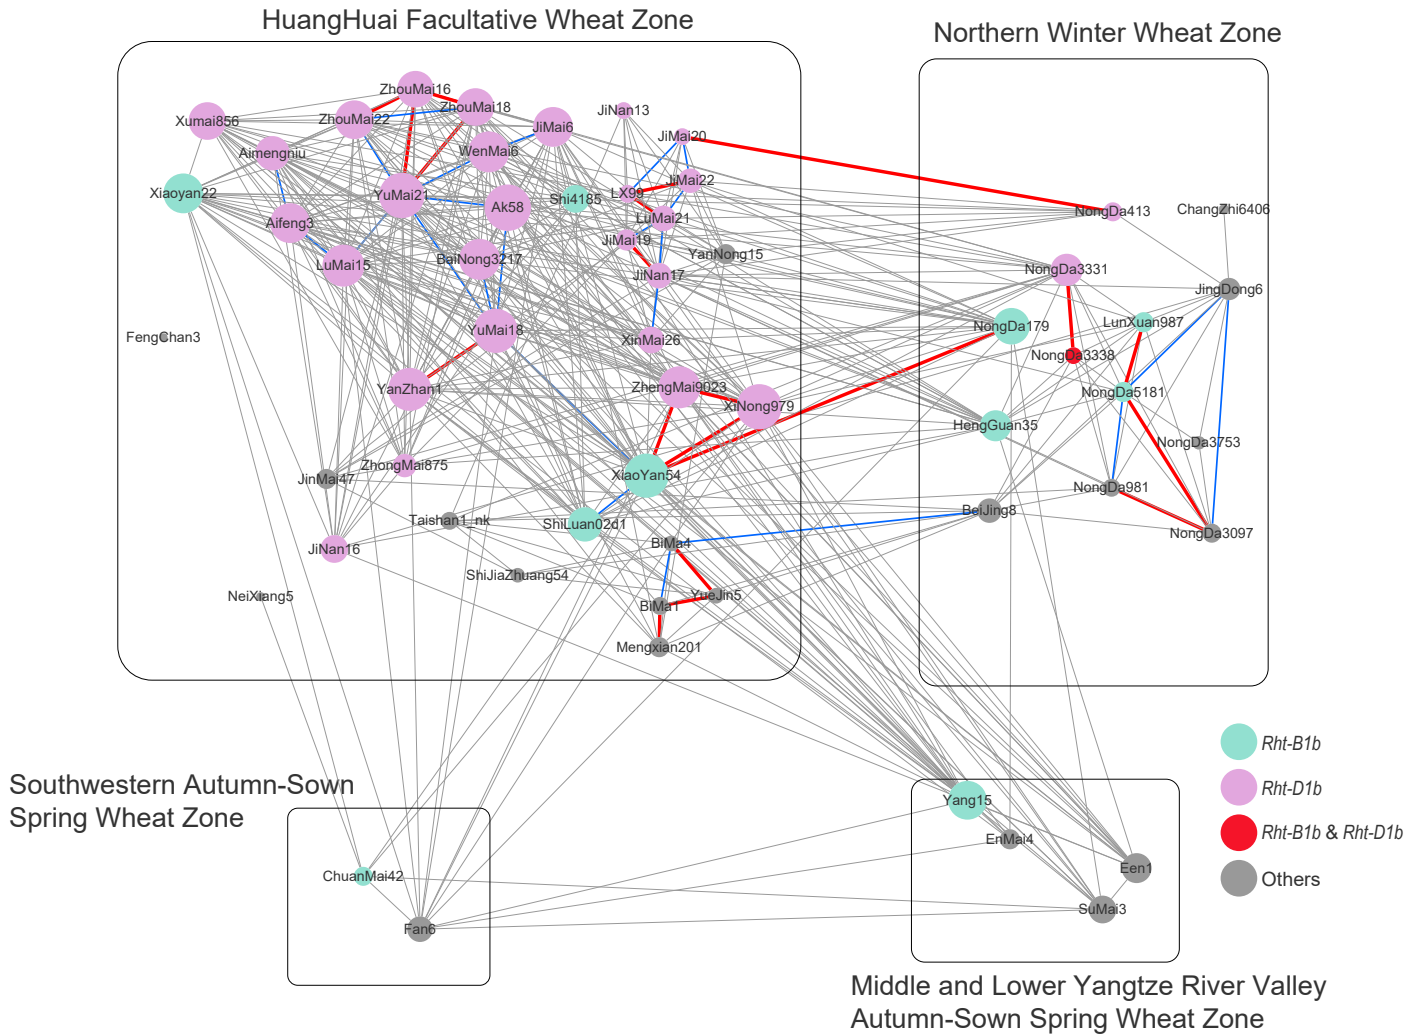

Supplemental Figure S27. The trajectories of semi-dwarf alleles *Rht-B1b* and *Rht-D1b* utilization in Chinese cultivars were presented in context of GGNet.

Abbreviation: GGNet, genomic-based germplasm network

**Supplemental Table S1:** Detailed information of the whole genome resequencing data of wheat used in this study.

| Sample ID | Vcf ID   | Accession name  | Origin          | Accession type | Source                                        |
|-----------|----------|-----------------|-----------------|----------------|-----------------------------------------------|
| C37       | S24      | Zhumaoyuanzitou | Zhejiang, China | CNL            | fastq from Cheng et al., Genome Biology, 2019 |
| C29       | 36-44210 | Uzbekistan1     | Uzbekistan      | ASL            | fastq from Cheng et al., Genome Biology, 2019 |
| C30       | 37-44211 | Uzbekistan2     | Uzbekistan      | ASL            | fastq from Cheng et al., Genome Biology, 2019 |
| C11       | 18-40978 | America1        | USA             | AMC            | fastq from Cheng et al., Genome Biology, 2019 |
| C12       | 19-40979 | America2        | USA             | AMC            | fastq from Cheng et al., Genome Biology, 2019 |
| C13       | 20-40982 | America3        | USA             | AMC            | fastq from Cheng et al., Genome Biology, 2019 |
| C14       | 21-40983 | America4        | USA             | AMC            | fastq from Cheng et al., Genome Biology, 2019 |
| C15       | 22-40984 | America5        | USA             | AMC            | fastq from Cheng et al., Genome Biology, 2019 |
| C16       | 23-40985 | America6        | USA             | AMC            | fastq from Cheng et al., Genome Biology, 2019 |
| C17       | 24-40989 | America7        | USA             | AMC            | fastq from Cheng et al., Genome Biology, 2019 |
| C18       | 25-40990 | America8        | USA             | AMC            | fastq from Cheng et al., Genome Biology, 2019 |
| C19       | 26-40991 | America9        | USA             | AMC            | fastq from Cheng et al., Genome Biology, 2019 |
| C49       | ALS      | Alsen           | USA             | AMC            | fastq from Cheng et al., Genome Biology, 2019 |
| C7        | 7-87821  | Spain1          | Spain           | EUL            | fastq from Cheng et al., Genome Biology, 2019 |
| C38       | S26      | Chengduguangtou | Sichuan, China  | CNL            | fastq from Cheng et al., Genome Biology, 2019 |
| C45       | S10      | Chuanmai42      | Sichuan, China  | CNC            | fastq from Cheng et al., Genome Biology, 2019 |
| CS        | CS       | CS              | Sichuan, China  | CNL            | fastq from Cheng et al., Genome Biology, 2019 |
| C43       | S8       | Xinong979       | Shannxi, China  | CNC            | fastq from Cheng et al., Genome Biology, 2019 |
| C47       | XIA      | Xiaoyan54       | Shannxi, China  | CNC            | fastq from Cheng et al., Genome Biology, 2019 |
| C44       | S9       | Jimai6          | Shandong, China | CNC            | fastq from Cheng et al., Genome Biology, 2019 |



|     |           |            |                         |     |                                               |
|-----|-----------|------------|-------------------------|-----|-----------------------------------------------|
| C9  | 9-76299   | Portugal1  | Portugal                | EUL | fastq from Cheng et al., Genome Biology, 2019 |
| C10 | 10-83979  | Portugal2  | Portugal                | EUL | fastq from Cheng et al., Genome Biology, 2019 |
| C58 | PAS       | Pastor     | Mexico                  | AMC | fastq from Cheng et al., Genome Biology, 2019 |
| C24 | 31-44196  | Jordan1    | Jordan                  | ASL | fastq from Cheng et al., Genome Biology, 2019 |
| C25 | 32-44203  | Jordan2    | Jordan                  | ASL | fastq from Cheng et al., Genome Biology, 2019 |
| C41 | S6        | Yang15     | Jiangsu, China          | CNC | fastq from Cheng et al., Genome Biology, 2019 |
| C8  | 8-82678   | Italy1     | Italy                   | EUL | fastq from Cheng et al., Genome Biology, 2019 |
| C60 | VOL       | Volcanidd1 | Israel                  | ASC | fastq from Cheng et al., Genome Biology, 2019 |
| C40 | S25       | Huoliaomai | InnerMongolia,<br>China | CNL | fastq from Cheng et al., Genome Biology, 2019 |
| C31 | 11-43461  | India1_C   | India                   | ASC | fastq from Cheng et al., Genome Biology, 2019 |
| C32 | 13-90293  | India2_C   | India                   | ASC | fastq from Cheng et al., Genome Biology, 2019 |
| C33 | 12-82173  | India1_L   | India                   | ASL | fastq from Cheng et al., Genome Biology, 2019 |
| C34 | 14-108679 | India2_L   | India                   | ASL | fastq from Cheng et al., Genome Biology, 2019 |
| C35 | 15-108680 | India3_L   | India                   | ASL | fastq from Cheng et al., Genome Biology, 2019 |
| C46 | S11       | Aikang58   | Henan, China            | CNC | fastq from Cheng et al., Genome Biology, 2019 |
| C36 | S23       | Baimangmai | Heilongjiang,<br>China  | CNL | fastq from Cheng et al., Genome Biology, 2019 |
| C39 | S22       | Yangmai    | Heilongjiang,<br>China  | CNL | fastq from Cheng et al., Genome Biology, 2019 |
| C22 | 28-42030  | Egypt_C    | Egypt                   | AFC | fastq from Cheng et al., Genome Biology, 2019 |
| C23 | 29-82283  | Egypt_L    | Egypt                   | AFL | fastq from Cheng et al., Genome Biology, 2019 |
| C48 | ACB       | AcBarrie   | Canada                  | AMC | fastq from Cheng et al., Genome Biology, 2019 |
| C4  | 4-87909   | Bulgaria1  | Bulgaria                | EUL | fastq from Cheng et al., Genome Biology, 2019 |
| C2  | 2-90377   | Austria2   | Austria                 | EUL | fastq from Cheng et al., Genome Biology, 2019 |

|             |             |              |                 |     |                                                       |
|-------------|-------------|--------------|-----------------|-----|-------------------------------------------------------|
| C3          | 3-90350     | Austria3     | Austria         | EUL | fastq from Cheng et al., Genome Biology, 2019         |
| C50         | YIT         | Yitpi        | Australia       | AUC | fastq from Cheng et al., Genome Biology, 2019         |
| C51         | BAX         | Baxter       | Australia       | AUC | fastq from Cheng et al., Genome Biology, 2019         |
| C52         | CH7         | Chara        | Australia       | AUC | fastq from Cheng et al., Genome Biology, 2019         |
| C53         | DRY         | Drysdale     | Australia       | AUC | fastq from Cheng et al., Genome Biology, 2019         |
| C54         | EXC         | Excalibur    | Australia       | AUC | fastq from Cheng et al., Genome Biology, 2019         |
| C55         | GLA         | Gladius      | Australia       | AUC | fastq from Cheng et al., Genome Biology, 2019         |
| C56         | H45         | H45          | Australia       | AUC | fastq from Cheng et al., Genome Biology, 2019         |
| C57         | KUK         | Kukri        | Australia       | AUC | fastq from Cheng et al., Genome Biology, 2019         |
| C59         | RAC         | Rac875       | Australia       | AUC | fastq from Cheng et al., Genome Biology, 2019         |
| C61         | WES         | Westonia     | Australia       | AUC | fastq from Cheng et al., Genome Biology, 2019         |
| C62         | WYA         | Wyalkatchem  | Australia       | AUC | fastq from Cheng et al., Genome Biology, 2019         |
| C21         | 17-44520    | Armenia2     | Armenia         | ASL | fastq from Cheng et al., Genome Biology, 2019         |
| C5          | 5-43363     | Andorra1     | Andorra         | EUL | fastq from Cheng et al., Genome Biology, 2019         |
| C6          | 6-43390     | Andorra2     | Andorra         | EUL | fastq from Cheng et al., Genome Biology, 2019         |
| C26         | 33-83965    | Afghanistan1 | Afghanistan     | ASL | fastq from Cheng et al., Genome Biology, 2019         |
| C27         | 34-99221    | Afghanistan2 | Afghanistan     | ASL | fastq from Cheng et al., Genome Biology, 2019         |
| C28         | 35-90184    | Afghanistan3 | Afghanistan     | ASL | fastq from Cheng et al., Genome Biology, 2019         |
| SRR10766588 | SRR10766588 | Aifeng3      | Shannxi, China  | CNC | fastq from Chenyang Hao, et al. Molecular Plant, 2020 |
| SRR10766624 | SRR10766624 | Xiaoyan22    | Shannxi, China  | CNC | fastq from Chenyang Hao, et al. Molecular Plant, 2020 |
| SRR10766512 | SRR10766512 | Aimengniu    | Shandong, China | CNC | fastq from Chenyang Hao, et al. Molecular Plant, 2020 |
| SRR10766631 | SRR10766631 | Taishan1     | Shandong, China | CNC | fastq from Chenyang Hao, et al. Molecular Plant, 2020 |

|             |             |                   |                |     |                                                       |
|-------------|-------------|-------------------|----------------|-----|-------------------------------------------------------|
| SRR10766628 | SRR10766628 | Xumai856          | Jiangsu, China | CNC | fastq from Chenyang Hao, et al. Molecular Plant, 2020 |
| SRR10766529 | SRR10766529 | Funo              | Italy          | EUC | fastq from Chenyang Hao, et al. Molecular Plant, 2020 |
| SRR10766564 | SRR10766564 | Een1              | Hubei, China   | CNC | fastq from Chenyang Hao, et al. Molecular Plant, 2020 |
| SRR10766583 | SRR10766583 | Mengxian201       | Henan, China   | CNC | fastq from Chenyang Hao, et al. Molecular Plant, 2020 |
| S6          | ZY-6        | Yntieke6          | Yunnan, China  | CNL | bam from Guo et al., Nature Communications, 2020      |
| S175        | S175        | Yunnan098         | Yunnan, China  | CNC | bam from Guo et al., Nature Communications, 2020      |
| S176        | S176        | Yunnan109         | Yunnan, China  | CNL | bam from Guo et al., Nature Communications, 2020      |
| S17         | ZY-17       | Jiachasuisui8     | Xizang, China  | CNW | bam from Guo et al., Nature Communications, 2020      |
| S24         | ZY-24       | Langxiansuisui17  | Xizang, China  | CNW | bam from Guo et al., Nature Communications, 2020      |
| S31         | ZY-31       | Chayazheda18      | Xizang, China  | CNW | bam from Guo et al., Nature Communications, 2020      |
| S75         | S75         | Rikazelasa1367    | Xizang, China  | CNL | bam from Guo et al., Nature Communications, 2020      |
| S78         | S78         | Qushui1340        | Xizang, China  | CNL | bam from Guo et al., Nature Communications, 2020      |
| S83         | S83         | Mozhugongka2064   | Xizang, China  | CNL | bam from Guo et al., Nature Communications, 2020      |
| S91         | S91         | Duilongdeqing1521 | Xizang, China  | CNL | bam from Guo et al., Nature Communications, 2020      |
| S143        | S143        | Langxiansuisui6   | Xizang, China  | CNW | bam from Guo et al., Nature Communications, 2020      |
| S147        | S147        | Jiachazheda37     | Xizang, China  | CNW | bam from Guo et al., Nature Communications, 2020      |
| S243        | S243        | Zhahong           | Xizang, China  | CNL | bam from Guo et al., Nature Communications, 2020      |
| S244        | S244        | Motuo             | Xizang, China  | CNL | bam from Guo et al., Nature Communications, 2020      |
| S245        | S245        | Bianbachunmai6    | Xizang, China  | CNL | bam from Guo et al., Nature Communications, 2020      |
| S247        | S247        | Wujiangzhuo       | Xizang, China  | CNL | bam from Guo et al., Nature Communications, 2020      |
| S248        | S248        | Mozongzhuoga      | Xizang, China  | CNL | bam from Guo et al., Nature Communications, 2020      |
| Zang1817    | Zang1817    | Zang1817          | Xizang, China  | CNW | bam from Guo et al., Nature Communications, 2020      |

|      |      |                |                 |     |                                                  |
|------|------|----------------|-----------------|-----|--------------------------------------------------|
| S170 | S170 | Xjm1           | Xinjiang, China | CNL | bam from Guo et al., Nature Communications, 2020 |
| S172 | S172 | Xjm29          | Xinjiang, China | CNL | bam from Guo et al., Nature Communications, 2020 |
| S252 | S252 | Hongchunmai    | Xinjiang, China | CNL | bam from Guo et al., Nature Communications, 2020 |
| S253 | S253 | Hongdongmai    | Xinjiang, China | CNL | bam from Guo et al., Nature Communications, 2020 |
| S254 | S254 | Hongjinbaoyin  | Xinjiang, China | CNL | bam from Guo et al., Nature Communications, 2020 |
| S231 | S231 | Clark          | USA             | AMC | bam from Guo et al., Nature Communications, 2020 |
| S232 | S232 | Atlas66        | USA             | AMC | bam from Guo et al., Nature Communications, 2020 |
| S234 | S234 | Spark          | UK              | EUC | bam from Guo et al., Nature Communications, 2020 |
| S133 | S133 | Turkmenistan5  | Turkmenistan    | ASL | bam from Guo et al., Nature Communications, 2020 |
| S123 | S123 | Turkey96       | Turkey          | ASL | bam from Guo et al., Nature Communications, 2020 |
| S131 | S131 | Turkey56       | Turkey          | ASL | bam from Guo et al., Nature Communications, 2020 |
| S203 | S203 | Turkey49       | Turkey          | ASL | bam from Guo et al., Nature Communications, 2020 |
| S126 | S126 | Tajikistan1    | Tajikistan      | ASL | bam from Guo et al., Nature Communications, 2020 |
| S127 | S127 | Tajikistan4    | Tajikistan      | ASL | bam from Guo et al., Nature Communications, 2020 |
| S94  | S94  | Sc1666         | Sichuan, China  | CNL | bam from Guo et al., Nature Communications, 2020 |
| S97  | S97  | Sc1588         | Sichuan, China  | CNL | bam from Guo et al., Nature Communications, 2020 |
| S216 | S216 | Fan6           | Sichuan, China  | CNC | bam from Guo et al., Nature Communications, 2020 |
| S242 | S242 | Bendihuanghua  | Sichuan, China  | CNL | bam from Guo et al., Nature Communications, 2020 |
| S246 | S246 | Baimangxiaomai | Sichuan, China  | CNL | bam from Guo et al., Nature Communications, 2020 |
| S249 | S249 | Kangding1      | Sichuan, China  | CNL | bam from Guo et al., Nature Communications, 2020 |
| S180 | S180 | Dingxingzhai   | Shanxi, China   | CNL | bam from Guo et al., Nature Communications, 2020 |
| S181 | S181 | Baihuomai      | Shanxi, China   | CNL | bam from Guo et al., Nature Communications, 2020 |

|      |      |               |                 |     |                                                  |
|------|------|---------------|-----------------|-----|--------------------------------------------------|
| S209 | S209 | Changzhi6406  | Shanxi, China   | CNC | bam from Guo et al., Nature Communications, 2020 |
| S182 | S182 | Chunxiaomai   | Shannxi, China  | CNL | bam from Guo et al., Nature Communications, 2020 |
| S183 | S183 | Mazhamai      | Shannxi, China  | CNL | bam from Guo et al., Nature Communications, 2020 |
| S184 | S184 | Xiaosanyueh   | Shannxi, China  | CNL | bam from Guo et al., Nature Communications, 2020 |
| S213 | S213 | Bima4         | Shannxi, China  | CNC | bam from Guo et al., Nature Communications, 2020 |
| S214 | S214 | Fengchan3     | Shannxi, China  | CNC | bam from Guo et al., Nature Communications, 2020 |
| S136 | S136 | Yannong15     | Shandong, China | CNC | bam from Guo et al., Nature Communications, 2020 |
| S137 | S137 | Lumai21       | Shandong, China | CNC | bam from Guo et al., Nature Communications, 2020 |
| S185 | S185 | Xishanbiansui | Shandong, China | CNL | bam from Guo et al., Nature Communications, 2020 |
| S186 | S186 | Baibiansui    | Shandong, China | CNL | bam from Guo et al., Nature Communications, 2020 |
| S187 | S187 | Dalibanmang   | Shandong, China | CNL | bam from Guo et al., Nature Communications, 2020 |
| S188 | S188 | Laolaixia     | Shandong, China | CNL | bam from Guo et al., Nature Communications, 2020 |
| S215 | S215 | Jinan17       | Shandong, China | CNC | bam from Guo et al., Nature Communications, 2020 |
| S130 | S130 | Russian5      | Russia          | EUL | bam from Guo et al., Nature Communications, 2020 |
| S237 | S237 | Aodesa3       | Russia          | EUC | bam from Guo et al., Nature Communications, 2020 |
| S212 | S212 | Lovrin10      | Romania         | EUC | bam from Guo et al., Nature Communications, 2020 |
| S110 | S110 | Xiaohongmai   | Qinghai, China  | CNL | bam from Guo et al., Nature Communications, 2020 |
| S111 | S111 | Xiaomai       | Qinghai, China  | CNL | bam from Guo et al., Nature Communications, 2020 |
| S112 | S112 | Maohongmai    | Qinghai, China  | CNL | bam from Guo et al., Nature Communications, 2020 |
| S113 | S113 | Liuyuehuang   | Qinghai, China  | CNL | bam from Guo et al., Nature Communications, 2020 |
| S114 | S114 | Duanbaimai    | Qinghai, China  | CNL | bam from Guo et al., Nature Communications, 2020 |
| S241 | S241 | Gejixiang     | Qinghai, China  | CNL | bam from Guo et al., Nature Communications, 2020 |

|      |       |              |                |     |                                                  |
|------|-------|--------------|----------------|-----|--------------------------------------------------|
| S132 | S132  | Palestinian4 | Palestine      | ASL | bam from Guo et al., Nature Communications, 2020 |
| S108 | S108  | Shanmai      | Ningxia, China | CNL | bam from Guo et al., Nature Communications, 2020 |
| S109 | S109  | Tutoumai     | Ningxia, China | CNL | bam from Guo et al., Nature Communications, 2020 |
| S206 | S206  | Nepal6       | Nepal          | ASL | bam from Guo et al., Nature Communications, 2020 |
| S207 | S207  | Nepal7       | Nepal          | ASL | bam from Guo et al., Nature Communications, 2020 |
| S124 | S124  | Morocco9     | Morocco        | AFL | bam from Guo et al., Nature Communications, 2020 |
| S204 | S204  | Jordan47     | Jordan         | ASL | bam from Guo et al., Nature Communications, 2020 |
| S210 | S210  | Sumai3       | Jiangsu, China | CNC | bam from Guo et al., Nature Communications, 2020 |
| S238 | S238  | Norin10      | Japan          | ASC | bam from Guo et al., Nature Communications, 2020 |
| S219 | S219  | Nanda2419    | Italy          | EUC | bam from Guo et al., Nature Communications, 2020 |
| S223 | S223  | Zhengyin4    | Italy          | EUC | bam from Guo et al., Nature Communications, 2020 |
| S208 | S208  | India4_L     | India          | ASL | bam from Guo et al., Nature Communications, 2020 |
| S211 | S211  | Enmai4       | Hubei, China   | CNC | bam from Guo et al., Nature Communications, 2020 |
| S10  | ZY-10 | Pingyuan50   | Henan, China   | CNL | bam from Guo et al., Nature Communications, 2020 |
| S135 | S135  | Zhoumai18    | Henan, China   | CNC | bam from Guo et al., Nature Communications, 2020 |
| S139 | S139  | Yumai18      | Henan, China   | CNC | bam from Guo et al., Nature Communications, 2020 |
| S217 | S217  | Zhengmai9023 | Henan, China   | CNC | bam from Guo et al., Nature Communications, 2020 |
| S218 | S218  | Yanzhan1     | Henan, China   | CNC | bam from Guo et al., Nature Communications, 2020 |
| S221 | S221  | Yumai21      | Henan, China   | CNC | bam from Guo et al., Nature Communications, 2020 |
| S224 | S224  | Bainong3217  | Henan, China   | CNC | bam from Guo et al., Nature Communications, 2020 |
| S64  | ZY-64 | Shi4185      | Hebei, China   | CNC | bam from Guo et al., Nature Communications, 2020 |
| S142 | S142  | Shiluan02D1  | Hebei, China   | CNC | bam from Guo et al., Nature Communications, 2020 |

|       |       |                |                |     |                                                  |
|-------|-------|----------------|----------------|-----|--------------------------------------------------|
| S227  | S227  | Shijiazhuang54 | Hebei, China   | CNC | bam from Guo et al., Nature Communications, 2020 |
| S233  | S233  | Rektor         | Germany        | EUC | bam from Guo et al., Nature Communications, 2020 |
| S128  | S128  | Georgia7       | Georgia        | ASL | bam from Guo et al., Nature Communications, 2020 |
| S129  | S129  | Georgia9       | Georgia        | ASL | bam from Guo et al., Nature Communications, 2020 |
| S101  | S101  | Hongqimai      | Gansu, China   | CNL | bam from Guo et al., Nature Communications, 2020 |
| S102  | S102  | Duanyaomai     | Gansu, China   | CNL | bam from Guo et al., Nature Communications, 2020 |
| S103  | S103  | Dabaimai       | Gansu, China   | CNL | bam from Guo et al., Nature Communications, 2020 |
| S104  | S104  | Baimuxianban   | Gansu, China   | CNL | bam from Guo et al., Nature Communications, 2020 |
| S105  | S105  | Honghuosui     | Gansu, China   | CNL | bam from Guo et al., Nature Communications, 2020 |
| S106  | S106  | Baidatou       | Gansu, China   | CNL | bam from Guo et al., Nature Communications, 2020 |
| S240  | S240  | Lanhuamai      | Gansu, China   | CNL | bam from Guo et al., Nature Communications, 2020 |
| S250  | S250  | Yizhimai       | Gansu, China   | CNL | bam from Guo et al., Nature Communications, 2020 |
| S251  | S251  | Huoliyan       | Gansu, China   | CNL | bam from Guo et al., Nature Communications, 2020 |
| S12   | ZY-12 | Apache         | France         | EUC | bam from Guo et al., Nature Communications, 2020 |
| S235  | S235  | Aztec          | France         | EUC | bam from Guo et al., Nature Communications, 2020 |
| S125  | S125  | Ethiopia3      | Ethiopia       | AFL | bam from Guo et al., Nature Communications, 2020 |
| S205  | S205  | Egypt40        | Egypt          | AFL | bam from Guo et al., Nature Communications, 2020 |
| S11   | ZY-11 | Yanda1817      | Beijing, China | CNL | bam from Guo et al., Nature Communications, 2020 |
| S67   | ZY-67 | Nongda3338     | Beijing, China | CNC | bam from Guo et al., Nature Communications, 2020 |
| S3331 | s3331 | Nongda3331     | Beijing, China | CNC | bam from Guo et al., Nature Communications, 2020 |
| S6554 | s6554 | Jingdong6      | Beijing, China | CNC | bam from Guo et al., Nature Communications, 2020 |
| S140  | S140  | Nongda5181     | Beijing, China | CNC | bam from Guo et al., Nature Communications, 2020 |

|              |              |              |                 |     |                                                  |
|--------------|--------------|--------------|-----------------|-----|--------------------------------------------------|
| S225         | S225         | Beijing8     | Beijing, China  | CNC | bam from Guo et al., Nature Communications, 2020 |
| S134         | S134         | Azerbaijan3  | Azerbaijan      | ASL | bam from Guo et al., Nature Communications, 2020 |
| S239         | S239         | Optimus      | Australia       | AUC | bam from Guo et al., Nature Communications, 2020 |
| S122         | S122         | Armenia1     | Armenia         | ASL | bam from Guo et al., Nature Communications, 2020 |
| PH46         | WXB2         | Bima1        | Shannxi, China  | CNC | this study                                       |
| PH49         | WXB10        | Jimai19      | Shandong, China | CNC | this study                                       |
| PH51         | WXB21        | Jinan13      | Shandong, China | CNC | this study                                       |
| PH52         | WXB22        | Jinan16      | Shandong, China | CNC | this study                                       |
| PH56         | WXB44        | Lumai15      | Shandong, China | CNC | this study                                       |
| PH68         | WXB89        | Yuejin5      | Shandong, China | CNC | this study                                       |
| PH148        | WXB472       | Wangshuibai  | Jiangsu, China  | CNL | this study                                       |
| PH95         | WXB206       | Xinmai26     | Henan, China    | CNC | this study                                       |
| PH105        | WXB268       | Zhoumai16    | Henan, China    | CNC | this study                                       |
| PH108        | WXB273       | Zhoumai22    | Henan, China    | CNC | this study                                       |
| PH135        | WXB409       | Zhongmai875  | Henan, China    | CNC | this study                                       |
| PH151        | WXB562       | Wenmai6      | Henan, China    | CNC | this study                                       |
| PH153        | WXB576       | Neixiang5    | Henan, China    | CNC | this study                                       |
| PH126        | WXB331       | Hengguan35   | Hebei, China    | CNC | this study                                       |
| PH132        | WXB387       | Nongda179    | Beijing, China  | CNC | this study                                       |
| PH133        | WXB394       | Nongda413    | Beijing, China  | CNC | this study                                       |
| PH09         | Fielder      | Fielder      | USA             | AMC | this study                                       |
| XM01         | S47-1        | Jinmai47     | Shanxi, China   | CNC | this study                                       |
| PH10         | JM20         | Jimai20      | Shandong, China | CNC | this study                                       |
| NZ05         | LX987        | Lunxuan987   | Beijing, China  | CNC | this study                                       |
| YM05         | LX99-1-1     | Liangxing99  | Shandong, China | CNC | this study                                       |
| YM02         | N981-1       | Nongda981    | Beijing, China  | CNC | this study                                       |
| YM07         | s3753-1      | Nongda3753   | Beijing, China  | CNC | this study                                       |
| YM03         | s3097-1      | Nongda3097   | Beijing, China  | CNC | this study                                       |
| NZ10         | C4-2         | Jimai22      | Shandong, China | CNC | this study                                       |
| S141         | S141         | Feimai       | Denmark         | EUC | this study                                       |
| Jagger       | Jagger       | Jagger       | USA             | AMC | fastq from Walkowiak, et al. Nature, 2020        |
| CDC_Landmark | CDC_Landmark | CDC_Landmark | USA             | AMC | fastq from Walkowiak, et al. Nature, 2020        |
| CDC_Stanley  | CDC_Stanley  | CDC_Stanley  | USA             | AMC | fastq from Walkowiak, et al. Nature, 2020        |
| ArinaLrFor   | ArinaLrFor   | Arinalrfor   | Switzerland     | EUC | fastq from Walkowiak, et al. Nature, 2020        |
| Norin61      | Norin61      | Norin61      | Japan           | ASC | fastq from Walkowiak, et al. Nature, 2020        |



|           |           |           |           |     |                                              |
|-----------|-----------|-----------|-----------|-----|----------------------------------------------|
| SY_Mattis | SY_Mattis | SY_Mattis | France    | EUC | fastq from Walkowiak, et al.<br>Nature, 2020 |
| Lancer    | Lancer    | Lancer    | Australia | AUC | fastq from Walkowiak, et al.<br>Nature, 2020 |
| Mace      | Mace      | Mace      | Australia | AUC | fastq from Walkowiak, et al.<br>Nature, 2020 |

Abbreviations: CNC, Chinese cultivar; CNL, Chinese landrace; CNW, Chinese semi-wild; EUC, European cultivar; EUL, European landrace; AUC, Australian cultivar; AFC, African cultivar; AFL, African landrace; AMC, American cultivar; ASC, Asian cultivar; ASL, Asian landrace.

**Supplementary Table S2.** Chromosomal crossover counts in Nongda5181 between its parents Nongda3097 and Lunxuan987

| Chromosome | Number of crossovers |
|------------|----------------------|
| chr1A      | 1                    |
| chr1B      | 3                    |
| chr1D      | 6                    |
| chr2A      | 9                    |
| chr2B      | 1                    |
| chr2D      | 1                    |
| chr3A      | 5                    |
| chr3B      | 2                    |
| chr3D      | 11                   |
| chr4A      | 2                    |
| chr4B      | 3                    |
| chr4D      | 2                    |
| chr5A      | 7                    |
| chr5B      | 7                    |
| chr5D      | 7                    |
| chr6A      | 2                    |
| chr6B      | 5                    |
| chr6D      | 7                    |
| chr7A      | 4                    |
| chr7B      | 3                    |
| chr7D      | 3                    |

**Supplementary Table S3.** Accessions that carried 1RS chromosome

| Accession name | Released year |
|----------------|---------------|
| Nongda3331     | -             |
| Nongda3338     | 1985          |
| Lumai15        | 1996          |
| Jingdong6      | 1991          |
| YuMai21        | 1982          |
| Shi4185        | 2014          |
| JiNan16        | 1998          |

|              |                                 |
|--------------|---------------------------------|
| ZhouMai16    | 2002                            |
| LunXuan987   | 2003                            |
| ZhouMai18    | 2004                            |
| HengGuan35   | 2004                            |
| Ak58         | 2005                            |
| ZhouMai22    | 2007                            |
| ZhongMai875  | 2014                            |
| NongDa5181   | 2014                            |
| Een1         | 1985                            |
| Xiaoyan22    | 1998                            |
| Xumai856     | 2004                            |
| Changzhi6406 | 1982                            |
| Lovrin10     | 1971<br>(introduced into China) |
| Aimengniu    | 1983                            |

**Supplementary Table S4.** *Rht-B1* and *Rht-D1* allele types in wheat accessions

| <b>Accession name</b> | <b><i>Rht-B1</i> type</b> | <b><i>Rht-D1</i> type</b> |
|-----------------------|---------------------------|---------------------------|
| AcBarrie              | <i>Rht-B1a</i>   others   | <i>Rht-D1a</i>   others   |
| Afghanistan1          | <i>Rht-B1a</i>   others   | <i>Rht-D1a</i>   others   |
| Afghanistan2          | <i>Rht-B1a</i>   others   | <i>Rht-D1a</i>   others   |
| Afghanistan3          | <i>Rht-B1a</i>   others   | <i>Rht-D1a</i>   others   |
| Aifeng3               | <i>Rht-B1h</i>            | <i>Rht-D1b</i>            |
| Aimengniu             | <i>Rht-B1a</i>   others   | <i>Rht-D1b</i>            |
| Aikang58              | <i>Rht-B1m</i>            | <i>Rht-D1b</i>            |
| Alsen                 | <i>Rht-B1b</i>            | <i>Rht-D1a</i>   others   |
| America1              | <i>Rht-B1i</i>            | <i>Rht-D1a</i>   others   |
| America2              | <i>Rht-B1b</i>            | <i>Rht-D1n2</i>           |
| America3              | <i>Rht-B1i</i>            | <i>Rht-D1n2</i>           |
| America4              | <i>Rht-B1i</i>            | <i>Rht-D1b</i>            |
| America5              | <i>Rht-B1a</i>   others   | <i>Rht-D1n2</i>           |
| America6              | <i>Rht-B1h</i>            | <i>Rht-D1b</i>            |
| America7              | <i>Rht-B1i</i>            | <i>Rht-D1b</i>            |
| America8              | <i>Rht-B1i</i>            | <i>Rht-D1b</i>            |
| America9              | <i>Rht-B1a</i>   others   | <i>Rht-D1b</i>            |
| Andorra1              | <i>Rht-B1a</i>   others   | <i>Rht-D1a</i>   others   |
| Andorra2              | <i>Rht-B1a</i>   others   | <i>Rht-D1a</i>   others   |
| Aodesa3               | <i>Rht-B1a</i>   others   | <i>Rht-D1a</i>   others   |
| Apache                | <i>Rht-B1a</i>   others   | <i>Rht-D1a</i>   others   |
| Arinalrfor            | <i>Rht-B1i</i>            | <i>Rht-D1a</i>   others   |
| Armenia1              | <i>Rht-B1a</i>   others   | <i>Rht-D1a</i>   others   |
| Armenia2              | <i>Rht-B1a</i>   others   | <i>Rht-D1a</i>   others   |
| Atlas66               | <i>Rht-B1a</i>   others   | <i>Rht-D1a</i>   others   |

|                   |                         |                         |
|-------------------|-------------------------|-------------------------|
| Austria2          | <i>Rht-B1a   others</i> | <i>Rht-D1a   others</i> |
| Austria3          | <i>Rht-B1a   others</i> | <i>Rht-D1a   others</i> |
| Azerbaijan3       | <i>Rht-B1a   others</i> | <i>Rht-D1a   others</i> |
| Aztec             | <i>Rht-B1h</i>          | <i>Rht-D1b</i>          |
| Baibiansui        | <i>Rht-B1a   others</i> | <i>Rht-D1n1</i>         |
| Baidatou          | <i>Rht-B1a   others</i> | <i>Rht-D1a   others</i> |
| Baihuomai         | <i>Rht-B1a   others</i> | <i>Rht-D1a   others</i> |
| Baimangmai        | <i>Rht-B1h</i>          | <i>Rht-D1n1</i>         |
| Baimangxiaomai    | <i>Rht-B1a   others</i> | <i>Rht-D1a   others</i> |
| Baimuxianban      | <i>Rht-B1a   others</i> | <i>Rht-D1a   others</i> |
| Bainong3217       | <i>Rht-B1h</i>          | <i>Rht-D1b</i>          |
| Baxter            | <i>Rht-B1b</i>          | <i>Rht-D1n1</i>         |
| Beijing8          | <i>Rht-B1a   others</i> | <i>Rht-D1a   others</i> |
| Bendihuanghua     | <i>Rht-B1a   others</i> | <i>Rht-D1a   others</i> |
| Bianbachunmai6    | <i>Rht-B1a   others</i> | <i>Rht-D1a   others</i> |
| Bima1             | <i>Rht-B1a   others</i> | <i>Rht-D1a   others</i> |
| Bima4             | <i>Rht-B1m</i>          | <i>Rht-D1a   others</i> |
| Bulgaria          | <i>Rht-B1a   others</i> | <i>Rht-D1a   others</i> |
| CDC_Landmark      | <i>Rht-B1b</i>          | <i>Rht-D1a   others</i> |
| CDC_Stanley       | <i>Rht-B1a   others</i> | <i>Rht-D1a   others</i> |
| Changzhi6406      | <i>Rht-B1a   others</i> | <i>Rht-D1a   others</i> |
| Chara             | <i>Rht-B1b</i>          | <i>Rht-D1a   others</i> |
| Chayazheda18      | <i>Rht-B1a   others</i> | <i>Rht-D1a   others</i> |
| Chengduguangtou   | <i>Rht-B1a   others</i> | <i>Rht-D1a   others</i> |
| Chuanmai42        | <i>Rht-B1b</i>          | <i>Rht-D1a   others</i> |
| Chunxiaomai       | <i>Rht-B1a   others</i> | <i>Rht-D1n1</i>         |
| Clark             | <i>Rht-B1b</i>          | <i>Rht-D1a   others</i> |
| CS                | <i>Rht-B1a   others</i> | <i>Rht-D1a   others</i> |
| Dabaimai          | <i>Rht-B1a   others</i> | <i>Rht-D1a   others</i> |
| Dalibanmang       | <i>Rht-B1i</i>          | <i>Rht-D1a   others</i> |
| Dingxingzhai      | <i>Rht-B1a   others</i> | <i>Rht-D1a   others</i> |
| Drysdale          | <i>Rht-B1a   others</i> | <i>Rht-D1b</i>          |
| Duanbaimai        | <i>Rht-B1a   others</i> | <i>Rht-D1a   others</i> |
| Duanyaomai        | <i>Rht-B1a   others</i> | <i>Rht-D1a   others</i> |
| Duilongdeqing1521 | <i>Rht-B1a   others</i> | <i>Rht-D1a   others</i> |
| Een1              | <i>Rht-B1a   others</i> | <i>Rht-D1n2</i>         |
| Egypt             | <i>Rht-B1a   others</i> | <i>Rht-D1a   others</i> |
| Egypt             | <i>Rht-B1a   others</i> | <i>Rht-D1a   others</i> |
| Egypt40           | <i>Rht-B1a   others</i> | <i>Rht-D1a   others</i> |
| Enmai4            | <i>Rht-B1a   others</i> | <i>Rht-D1n2</i>         |
| Ethiopia3         | <i>Rht-B1a   others</i> | <i>Rht-D1a   others</i> |
| Excalibur         | <i>Rht-B1a   others</i> | <i>Rht-D1b</i>          |
| Fan6              | <i>Rht-B1m</i>          | <i>Rht-D1n2</i>         |
| Feimai            | <i>Rht-B1h</i>          | <i>Rht-D1a   others</i> |

|                  |                         |                         |
|------------------|-------------------------|-------------------------|
| Fengchan3        | <i>Rht-B1a   others</i> | <i>Rht-D1a   others</i> |
| Fielder          | <i>Rht-B1b</i>          | <i>Rht-D1a   others</i> |
| Funo             | <i>Rht-B1a   others</i> | <i>Rht-D1n2</i>         |
| Gejiaxiang       | <i>Rht-B1a   others</i> | <i>Rht-D1a   others</i> |
| Georgia7         | <i>Rht-B1a   others</i> | <i>Rht-D1a   others</i> |
| Georgia9         | <i>Rht-B1a   others</i> | <i>Rht-D1a   others</i> |
| Gladius          | <i>Rht-B1m</i>          | <i>Rht-D1b</i>          |
| H45              | <i>Rht-B1b</i>          | <i>Rht-D1n1</i>         |
| Hengguan35       | <i>Rht-B1b</i>          | <i>Rht-D1n1</i>         |
| Hongchunmai      | <i>Rht-B1a   others</i> | <i>Rht-D1a   others</i> |
| Hongdongmai      | <i>Rht-B1a   others</i> | <i>Rht-D1a   others</i> |
| Honghuosui       | <i>Rht-B1a   others</i> | <i>Rht-D1a   others</i> |
| Hongjinbaoyin    | <i>Rht-B1a   others</i> | <i>Rht-D1a   others</i> |
| Hongqimai        | <i>Rht-B1a   others</i> | <i>Rht-D1a   others</i> |
| Huoliaomai       | <i>Rht-B1a   others</i> | <i>Rht-D1a   others</i> |
| Huoliyan         | <i>Rht-B1a   others</i> | <i>Rht-D1a   others</i> |
| India4_L         | <i>Rht-B1a   others</i> | <i>Rht-D1a   others</i> |
| India1_L         | <i>Rht-B1a   others</i> | <i>Rht-D1a   others</i> |
| India1_C         | <i>Rht-B1a   others</i> | <i>Rht-D1b</i>          |
| India2_L         | <i>Rht-B1a   others</i> | <i>Rht-D1a   others</i> |
| India2_C         | <i>Rht-B1b</i>          | <i>Rht-D1n1</i>         |
| India3_L         | <i>Rht-B1i</i>          | <i>Rht-D1a   others</i> |
| Italy            | <i>Rht-B1a   others</i> | <i>Rht-D1a   others</i> |
| Jagger           | <i>Rht-B1b</i>          | <i>Rht-D1n2</i>         |
| Jiachasuisui8    | <i>Rht-B1a   others</i> | <i>Rht-D1a   others</i> |
| Jiachazheda37    | <i>Rht-B1a   others</i> | <i>Rht-D1a   others</i> |
| Jimai19          | <i>Rht-B1a   others</i> | <i>Rht-D1b</i>          |
| Jimai20          | <i>Rht-B1a   others</i> | <i>Rht-D1b</i>          |
| Jimai22          | <i>Rht-B1i</i>          | <i>Rht-D1b</i>          |
| Jimai6           | <i>Rht-B1m</i>          | <i>Rht-D1b</i>          |
| Jinan13          | <i>Rht-B1m</i>          | <i>Rht-D1b</i>          |
| Jinan16          | <i>Rht-B1a   others</i> | <i>Rht-D1b</i>          |
| Jinan17          | <i>Rht-B1a   others</i> | <i>Rht-D1b</i>          |
| Jingdong6        | <i>Rht-B1a   others</i> | <i>Rht-D1a   others</i> |
| Jinmai47         | <i>Rht-B1a   others</i> | <i>Rht-D1a   others</i> |
| Jordan1          | <i>Rht-B1a   others</i> | <i>Rht-D1a   others</i> |
| Jordan2          | <i>Rht-B1a   others</i> | <i>Rht-D1a   others</i> |
| Jordan47         | <i>Rht-B1a   others</i> | <i>Rht-D1a   others</i> |
| Kangding1        | <i>Rht-B1a   others</i> | <i>Rht-D1a   others</i> |
| Kukri            | <i>Rht-B1a   others</i> | <i>Rht-D1b</i>          |
| Lancer           | <i>Rht-B1b</i>          | <i>Rht-D1a   others</i> |
| Langxiansuisui17 | <i>Rht-B1a   others</i> | <i>Rht-D1a   others</i> |
| Langxiansuisui6  | <i>Rht-B1a   others</i> | <i>Rht-D1a   others</i> |
| Lanhuamai        | <i>Rht-B1a   others</i> | <i>Rht-D1a   others</i> |

|                |                         |                         |
|----------------|-------------------------|-------------------------|
| Laolaixia      | <i>Rht-B1a   others</i> | <i>Rht-D1n1</i>         |
| Liuyuehuang    | <i>Rht-B1a   others</i> | <i>Rht-D1a   others</i> |
| Lovrin10       | <i>Rht-B1a   others</i> | <i>Rht-D1n1</i>         |
| Lumai15        | <i>Rht-B1h</i>          | <i>Rht-D1b</i>          |
| Lumai21        | <i>Rht-B1a   others</i> | <i>Rht-D1b</i>          |
| Lunxuan987     | <i>Rht-B1b</i>          | <i>Rht-D1n2</i>         |
| Lx99           | <i>Rht-B1a   others</i> | <i>Rht-D1b</i>          |
| Mace           | <i>Rht-B1m</i>          | <i>Rht-D1b</i>          |
| Maohongmai     | <i>Rht-B1a   others</i> | <i>Rht-D1a   others</i> |
| Mazhamai       | <i>Rht-B1a   others</i> | <i>Rht-D1a   others</i> |
| Mengxian201    | <i>Rht-B1a   others</i> | <i>Rht-D1n2</i>         |
| Morocco9       | <i>Rht-B1a   others</i> | <i>Rht-D1a   others</i> |
| Motuo          | <i>Rht-B1a   others</i> | <i>Rht-D1a   others</i> |
| Mozhugk2064    | <i>Rht-B1a   others</i> | <i>Rht-D1b</i>          |
| Mozongzhuoga   | <i>Rht-B1a   others</i> | <i>Rht-D1a   others</i> |
| Nanda2419      | <i>Rht-B1a   others</i> | <i>Rht-D1n1</i>         |
| Neixiang5      | <i>Rht-B1a   others</i> | <i>Rht-D1n1</i>         |
| Nepal6         | <i>Rht-B1a   others</i> | <i>Rht-D1a   others</i> |
| Nepal7         | <i>Rht-B1a   others</i> | <i>Rht-D1a   others</i> |
| Nongda179      | <i>Rht-B1b</i>          | <i>Rht-D1n1</i>         |
| Nongda3097     | <i>Rht-B1a   others</i> | <i>Rht-D1n1</i>         |
| Nongda3331     | <i>Rht-B1a   others</i> | <i>Rht-D1b</i>          |
| Nongda3338     | <i>Rht-B1b</i>          | <i>Rht-D1b</i>          |
| Nongda3753     | <i>Rht-B1a   others</i> | <i>Rht-D1a   others</i> |
| Nongda413      | <i>Rht-B1a   others</i> | <i>Rht-D1b</i>          |
| Nongda5181     | <i>Rht-B1b</i>          | <i>Rht-D1n1</i>         |
| Nongda981      | <i>Rht-B1h</i>          | <i>Rht-D1n1</i>         |
| Norin10        | <i>Rht-B1b</i>          | <i>Rht-D1b</i>          |
| Norin61        | <i>Rht-B1a   others</i> | <i>Rht-D1b</i>          |
| Optimus        | <i>Rht-B1i</i>          | <i>Rht-D1a   others</i> |
| Palestinian4   | <i>Rht-B1a   others</i> | <i>Rht-D1a   others</i> |
| Pastor         | <i>Rht-B1b</i>          | <i>Rht-D1n2</i>         |
| Pingyuan50     | <i>Rht-B1a   others</i> | <i>Rht-D1n1</i>         |
| Portugal1      | <i>Rht-B1a   others</i> | <i>Rht-D1a   others</i> |
| Portugal2      | <i>Rht-B1a   others</i> | <i>Rht-D1a   others</i> |
| Qushui1340     | <i>Rht-B1a   others</i> | <i>Rht-D1a   others</i> |
| Rac875         | <i>Rht-B1m</i>          | <i>Rht-D1b</i>          |
| Rektor         | <i>Rht-B1h</i>          | <i>Rht-D1a   others</i> |
| Rikazelasa1367 | <i>Rht-B1b</i>          | <i>Rht-D1a   others</i> |
| Russian5       | <i>Rht-B1a   others</i> | <i>Rht-D1a   others</i> |
| Sc1588         | <i>Rht-B1a   others</i> | <i>Rht-D1a   others</i> |
| Sc1666         | <i>Rht-B1a   others</i> | <i>Rht-D1a   others</i> |
| Shanmai        | <i>Rht-B1a   others</i> | <i>Rht-D1a   others</i> |
| Shi4185        | <i>Rht-B1b</i>          | <i>Rht-D1a   others</i> |

|                |                         |                         |
|----------------|-------------------------|-------------------------|
| Shijiazhuang54 | <i>Rht-B1a   others</i> | <i>Rht-D1a   others</i> |
| Shiluan02D1    | <i>Rht-B1b</i>          | <i>Rht-D1n1</i>         |
| Spain          | <i>Rht-B1a   others</i> | <i>Rht-D1a   others</i> |
| Spark          | <i>Rht-B1m</i>          | <i>Rht-D1a   others</i> |
| Sumai3         | <i>Rht-B1a   others</i> | <i>Rht-D1n2</i>         |
| Sy_Mattis      | <i>Rht-B1b</i>          | <i>Rht-D1a   others</i> |
| Taishan1_Nk    | <i>Rht-B1m</i>          | <i>Rht-D1n1</i>         |
| Tajikistan1    | <i>Rht-B1a   others</i> | <i>Rht-D1a   others</i> |
| Tajikistan4    | <i>Rht-B1a   others</i> | <i>Rht-D1a   others</i> |
| Turkey49       | <i>Rht-B1a   others</i> | <i>Rht-D1a   others</i> |
| Turkey56       | <i>Rht-B1a   others</i> | <i>Rht-D1a   others</i> |
| Turkey96       | <i>Rht-B1a   others</i> | <i>Rht-D1a   others</i> |
| Turkmenistan5  | <i>Rht-B1a   others</i> | <i>Rht-D1a   others</i> |
| Tutoumai       | <i>Rht-B1a   others</i> | <i>Rht-D1a   others</i> |
| Uzbekistan1    | <i>Rht-B1a   others</i> | <i>Rht-D1a   others</i> |
| Uzbekistan2    | <i>Rht-B1a   others</i> | <i>Rht-D1a   others</i> |
| Volcanidd1     | <i>Rht-B1a   others</i> | <i>Rht-D1b</i>          |
| Wangshuibai    | <i>Rht-B1a   others</i> | <i>Rht-D1n1</i>         |
| Wenmai6        | <i>Rht-B1m</i>          | <i>Rht-D1b</i>          |
| Westonia       | <i>Rht-B1a   others</i> | <i>Rht-D1b</i>          |
| Wujiangzhuo    | <i>Rht-B1a   others</i> | <i>Rht-D1a   others</i> |
| Wyalkatchem    | <i>Rht-B1a   others</i> | <i>Rht-D1b</i>          |
| Xiaohongmai    | <i>Rht-B1a   others</i> | <i>Rht-D1a   others</i> |
| Xiaomai        | <i>Rht-B1a   others</i> | <i>Rht-D1a   others</i> |
| Xiaosanyueh    | <i>Rht-B1a   others</i> | <i>Rht-D1a   others</i> |
| Xiaoyan22      | <i>Rht-B1b</i>          | <i>Rht-D1n2</i>         |
| Xiaoyan54      | <i>Rht-B1b</i>          | <i>Rht-D1n1</i>         |
| Xinmai26       | <i>Rht-B1a   others</i> | <i>Rht-D1b</i>          |
| Xinong979      | <i>Rht-B1h</i>          | <i>Rht-D1b</i>          |
| Xishanbiansui  | <i>Rht-B1a   others</i> | <i>Rht-D1a   others</i> |
| Xjm1           | <i>Rht-B1a   others</i> | <i>Rht-D1a   others</i> |
| Xjm29          | <i>Rht-B1a   others</i> | <i>Rht-D1a   others</i> |
| Xumai856       | <i>Rht-B1h</i>          | <i>Rht-D1b</i>          |
| Yanda1817      | <i>Rht-B1a   others</i> | <i>Rht-D1a   others</i> |
| Yang15         | <i>Rht-B1b</i>          | <i>Rht-D1n2</i>         |
| Yangmai        | <i>Rht-B1a   others</i> | <i>Rht-D1a   others</i> |
| Yannong15      | <i>Rht-B1a   others</i> | <i>Rht-D1n2</i>         |
| Yanzhan1       | <i>Rht-B1a   others</i> | <i>Rht-D1b</i>          |
| Yitpi          | <i>Rht-B1m</i>          | <i>Rht-D1b</i>          |
| Yizhimai       | <i>Rht-B1a   others</i> | <i>Rht-D1a   others</i> |
| Yntieke6       | <i>Rht-B1a   others</i> | <i>Rht-D1a   others</i> |
| Yuejin5        | <i>Rht-B1a   others</i> | <i>Rht-D1a   others</i> |
| Yumai18        | <i>Rht-B1a   others</i> | <i>Rht-D1b</i>          |
| Yumai21        | <i>Rht-B1a   others</i> | <i>Rht-D1b</i>          |

|                 |                         |                         |
|-----------------|-------------------------|-------------------------|
| Yunnan098       | <i>Rht-B1a   others</i> | <i>Rht-D1n1</i>         |
| Yunnan109       | <i>Rht-B1a   others</i> | <i>Rht-D1a   others</i> |
| Zang1817        | <i>Rht-B1a   others</i> | <i>Rht-D1a   others</i> |
| Zhahong         | <i>Rht-B1a   others</i> | <i>Rht-D1a   others</i> |
| Zhengmai9023    | <i>Rht-B1h</i>          | <i>Rht-D1b</i>          |
| Zhengyin4       | <i>Rht-B1b</i>          | <i>Rht-D1n2</i>         |
| Zhongmai875     | <i>Rht-B1a   others</i> | <i>Rht-D1b</i>          |
| Zhoumai16       | <i>Rht-B1a   others</i> | <i>Rht-D1b</i>          |
| Zhoumai18       | <i>Rht-B1a   others</i> | <i>Rht-D1b</i>          |
| Zhoumai22       | <i>Rht-B1a   others</i> | <i>Rht-D1b</i>          |
| Zhumaoyuanzitou | <i>Rht-B1a   others</i> | <i>Rht-D1a   others</i> |

**Supplementary Table S5.** Initial transition frequency matrix between observations

|     | SGR    | PHR    | CNV    |
|-----|--------|--------|--------|
| SGR | 0.8082 | 0.1415 | 0.0503 |
| PHR | 0.0442 | 0.9409 | 0.0149 |
| CNV | 0.208  | 0.1889 | 0.6031 |

Abbreviations: PHR, polymorphism hotspot regions; SGR, Shared Genomic resource Regions; CNV, Copy number variation

**Supplementary Table S6.** Trained state transition probability matrix and emission probability matrix

|     | state transition probabilities |        |        | emission probabilities |        |     |
|-----|--------------------------------|--------|--------|------------------------|--------|-----|
|     | SGR                            | PHR    | CNV    | SGR                    | PHR    | CNV |
| sgr | 0.9564                         | 0.0377 | 0.0035 | 0.9621                 | 0.0379 | 0   |
| phr | 0.0016                         | 0.9980 | 0.0104 | 0.0016                 | 0.9984 | 0   |
| cnv | 0.0035                         | 0.1576 | 0.8388 | 0                      | 0      | 1   |

Abbreviations: PHR, polymorphism hotspot regions; SGR, Shared Genomic resource Regions; CNV, Copy number variation

**References**

1. Guo W, Xin M, Wang Z, Yao Y, Hu Z, Song W, Yu K, Chen Y, Wang X, Guan P, et al: Origin and adaptation to high altitude of Tibetan semi-wild wheat. *Nat Commun* 2020, 11:5085.
2. Walkowiak S, Gao L, Monat C, Haberer G, Kassa MT, Brinton J, Ramirez-Gonzalez RH, Kolodziej MC, Delorean E, Thambugala D, et al: Multiple wheat genomes reveal global variation in modern breeding. *Nature* 2020, 588:277-283.
3. Cheng H, Liu J, Wen J, Nie X, Xu L, Chen N, Li Z, Wang Q, Zheng Z, Li M, et al: Frequent intra- and inter-species introgression shapes the landscape of genetic variation in bread wheat. *Genome Biol* 2019, 20:136.
4. Hao C, Jiao C, Hou J, Li T, Liu H, Wang Y, Zheng J, Liu H, Bi Z, Xu F, et al: Resequencing of 145 Landmark Cultivars Reveals Asymmetric Sub-genome Selection and Strong Founder Genotype Effects on Wheat Breeding in China. *Mol Plant* 2020, 13:1733-1751.
